# Supplementary material for: Fauna Europaea – all European animal species on the web
Source: PubMed Central journal article supplement (PMC4206781; doi:10.3897/bdj.2.e4034), 2014-09-17
Supplement: biodiversity_data_journal-2-e4034-s010.pdf [file biodiversity_data_journal-2-e4034-s010.pdf]

# Fauna Europaea

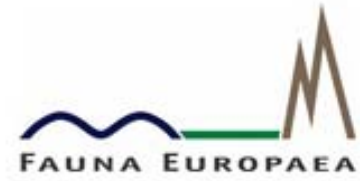

## *Cross-linking*

---

## Guidelines for Cross-linking

---

Yde de Jong & Günther Korb

---

Version – 23 July 2014

## Cross-linking:

The European Commission encourage the use of Fauna Europaea as a standard list for Europe. This was also one of the rationales behind the project. Therefore we support the cross-linking of relevant taxonomic or related information systems to Fauna Europaea.

Two ways of cross-linking to Fauna Europaea have been established: (1) a method of direct linking via the respective FaEu taxon ID's and (2) an indirect method using parameterised URLs including the relevant text elements to be searched.

### (1) Direct linking

A direct link to a taxon name in Fauna Europaea can be established by adding the appropriate taxon ID behind the following URL:

[http://www.faunaeur.org/full\\_results.php?id={LSID}](http://www.faunaeur.org/full_results.php?id={LSID})

For instance *Parus caeruleus* Linnaeus 1758 has the FaEu taxon ID '97274'. The relevant URL should be: [http://www.faunaeur.org/full\\_results.php?id=97274](http://www.faunaeur.org/full_results.php?id=97274)

Recently for direct linking more condensed URIs has been created for species IDs following the below scheme:

<http://www.faunaeur.org/t/{LSID}>

For instance: <http://www.faunaeur.org/t/337992>

The proper Taxon IDs can be found at the website or within the data file.

---

### (2) Indirect linking

A parameterised URL allows linking to the search function of Fauna Europaea. You can link to a genus name, a species name, a specific epithet or a higher taxon:

- To a genus name (for instance 'Parus'):

[http://www.faunaeur.org/index.php?show\\_what=search%20results&genus=Parus](http://www.faunaeur.org/index.php?show_what=search%20results&genus=Parus)

- To a species name (for instance 'Parus cristatus'):

[http://www.faunaeur.org/index.php?show\\_what=search%20results&genus=Parus&species=cristatus](http://www.faunaeur.org/index.php?show_what=search%20results&genus=Parus&species=cristatus)

- To a specific epithet (for instance 'cristatus'):

[http://www.faunaeur.org/index.php?show\\_what=search%20results&species=cristatus](http://www.faunaeur.org/index.php?show_what=search%20results&species=cristatus)

- To a higher taxon (for instance 'animalia'):

[http://www.faunaeur.org/index.php?show\\_what=search%20results&higher\\_taxon=Animalia](http://www.faunaeur.org/index.php?show_what=search%20results&higher_taxon=Animalia)

- It is also possible to include the 'search mode' (is, contains, starts with, ends with), for instance:

[http://www.faunaeur.org/index.php?show\\_what=search%20results&genus=Par&species=crista&genus\\_search\\_mode=starts%20with&species\\_search\\_mode=contains](http://www.faunaeur.org/index.php?show_what=search%20results&genus=Par&species=crista&genus_search_mode=starts%20with&species_search_mode=contains)

[http://www.faunaeur.org/index.php?show\\_what=search%20results&higher\\_taxon=mali&higher\\_taxon\\_search\\_mode=ends%20with](http://www.faunaeur.org/index.php?show_what=search%20results&higher_taxon=mali&higher_taxon_search_mode=ends%20with)

Default search mode is always 'is'.

A similar method can be used for linking to advanced search input (for instance 'Parus' and '1783'):

[http://www.faunaeur.org/advanced\\_search.php?show\\_what=search%20results&genus=Parus&year=1783](http://www.faunaeur.org/advanced_search.php?show_what=search%20results&genus=Parus&year=1783)

Evidently the second method contains a certain degree of fuzziness (meaning: is less exact) compared to the first method, however, the second method is far more easy to implement.

A shortened name URI is in preparation.

---

### **(3) Linking to PESI**

To enable cross-referencing with the PESI portal<sup>1</sup>, the following string can be used:

URL: <http://www.eu-nomen.eu/portal/taxon.php?guid=urn:lsid:faunaeur.org:taxname:441679>

Fauna Europaea LSID = 441679

---

### **(4) Linking to GBIF**

To optimise cross-linking to the GBIF portal, Fauna Europaea is included into the GBIF Checklist Bank<sup>2</sup>.

URL: <http://data.gbif.org/species/305289/resource/13560>

Fauna Europaea LSID = 305289

GBIF source = 13560

---

<sup>1</sup> <http://www.eu-nomen.eu/portal>

<sup>2</sup> Accessed via <http://www.gbif.org/dataset/90d9e8a6-0ce1-472d-b682-3451095dbc5a>
