# Supplementary material for: Fauna Europaea – all European animal species on the web
Source: Biodivers Data J. 2014 Sep 17;(2):e4034. doi: 10.3897/BDJ.2.e4034 (PMC4206781; doi:10.3897/BDJ.2.e4034)
Supplement: Supplementary material 2 — Fauna Europaea geographic codes and mappings to other standards (TDWG, ISO) and projects (Euro+Med PlantBase). [file biodiversity_data_journal-2-e4034-s002.xls]

## Sheet: FaEuGeoUnits_Europe
	Fauna Europaea
FaEUCode	FaEuName	Remarks
For recognised geopolitical entities in FaEu
AD	Andorra
AL	Albania
AT	Austria
BA	Bosnia and Herzegovina
BE	Belgium
BG	Bulgaria
BY	Belarus
CH	Switzerland
CY	Cyprus
CZ	Czech Republic
DE	Germany
DK-DEN	Danish mainland	Incl. Borholm I. Excl. Faroe Is. and Greenland
DK-FOR	Faroe Is.
EE	Estonia
ES-BAL	Balearic Is.	Incl. Mallorca I., Menorca I., and Pityuses Is. (= Ibiza I. + Formentera I.)
ES-CNY	Canary Is.	Fuerteventura (incl. Lobos), Gomera, Gran Canaria, Hierro, Lanzarote (incl. Graciosa and smaller islands), La Palma, Tenerife
ES-SPA	Spanish mainland	Incl. Alboran I.
FI	Finland	Incl. Aaland Islands (Ahvenanmaa)
FR-COR	Corsica
FR-FRA	French mainland
GB-CI	Channel Is.	Incl. Jersey, Guernsey, Alderney
GB-GI	Gibraltar
GB-GRB	Britain I.	Incl. Shetlands, Orkneys, Hebrides and Man Is. Excl. Channel Is. and Northern Ireland
GB-NI	Northern Ireland
GR-AEG	North Aegean Is.	Incl. Andípsara, Áyios Evstrátios, Foúrnoi, Ikaría, Khíos, Lésvos, Límnos, Oinoúsa, Psará, Sámos, Skópelos Kaloyeroi and other smaller islands. . Excl. Turkish East Aegean Islands, i.e. Bozcaada and Gökçeada
GR-CYC	Cyclades Is.	Incl. Amorgós, Anáfi, Ánidros, Ándros, Andíparos, Denoúsa, Folégandros, Íos, Iráklia, Káros, Kímolos, Kéa, Kythnos, Mílos, Mykonos, Náxos, Páros, Políaigos, Sérifos, Sífnos, Síkinos, Syros, Thíra, Tínos, Yiarós and other smaller islands
GR-DOD	Dodecanese Is.	Incl. Alimniá, Árkoi, Astipálaia, Avgonísi, Ankathonísi, Farmakonísi, Ioinianísia, Kálimnos, Kalolímnos, Kandelioúsa, Kárpathos, Kásos, Khálki, Khamilí, Kínaros, Kos, Léros, Levítha, Lipsói, Meyísti, Nísiros, Ofidoúsa, Pátmos, Ródhos, Saría, Sími, Sírina, Tílos, Tría Nisiá, Yialí and other smaller islands
GR-GRC	Greek mainland	Incl. Andikíthira I., Evvia I., Ionian Is., Samothráki I., Northern Sporades Is., Thásos I. Excl. All other islands and Crete
GR-KRI	Crete	Incl. small adjacent islands like Gávdhos. Note that Andikíthira I. although being closer to Kriti than to mainland, belongs to a mainland province
HR	Croatia
HU	Hungary
IE	Ireland	Not incl. Northern Ireland (GB-NI)
IS	Iceland
IT-ITA	Italian mainland	Incl. Toscano Is.
IT-SAR	Sardinia
IT-SI	Sicily	Incl. adjacent Italian islands (Lipari Is., Ustica I., Egadi Is., Pantelleria I., Pelagie Is.)
LI	Liechtenstein
LT	Lithuania
LU	Luxembourg
LV	Latvia
MC	Monaco
MD	Moldova, Republic of
MK	Macedonia
MT	Malta
NL	The Netherlands
NO-NOR	Norwegian mainland	Excl. Svalbard, Jan Mayen and Bear Is.
NO-SVA	Svalbard & Jan Mayen	Incl. Bear I.
PL	Poland
PT-AZO	Azores	Incl. Corvo, Faial, Flores, Graciosa, Pico, Santa Maria, São Jorge, São Miguel, Terceira
PT-MDR	Madeira	Incl. Desertas, Madeira, Porto Santo
PT-POR	Portuguese mainland
PT-SEL	Selvagens Is.
RO	Romania
RU-FJL	Franz Josef Land	Not incl. Ushakova I. and Vize I.
RU-KGD	Kaliningrad Region
RU-NOZ	Novaya Zemlya
RU-RUC	Russia Central
RU-RUE	Russia East
RU-RUN	Russia North
RU-RUS	Russia South
RU-RUW	Russia Northwest
SE	Sweden	Incl. Öland and Gotland Is.
SI	Slovenia
SK	Slovakia
SM	San Marino
TR-TUE	European Turkey	Incl. Imroz I. - Gökçeada. Excl. Islands in the Sea of Marmara and Bozcaada
UA	Ukraine	Incl. Krym
VA	Vatican City
YU	Serbia and Montenegro	Incl. Kosovo, Montenegro, Serbia, Voivodina

## Sheet: FaEu_comparison
					TDWG								ISO					Fauna Europaea				Euro+Med PlantBase
TDWG	TDWG	TDWG	TDWG	TDWG	TDWG	TDWG	TDWG	TDWG	ISO from TDWG	ISO from TDWG	ISO	ISO	ISO	ISO	ISO	ISO	FaEu	FaEu	FaEu	EMP	EMP	EMP	EMP
L1 code	L2 code	L3 code	L4 code final part	L4 code	L1 continent	L2 region	L3 area	L4 country	L3 ISO code	L4 ISO code	ISO_TWO_LET	ISO_THREE_LET	ISO_NAME	ISO_NUM	ISO3166-2 Code	ISO3166-2Name	FaEu Code	FaEu Name	Remarks	E+M code	Unit	L4 TDWG EMP	ISO EMP
In blue, old names or codes not in use anymore											In blue, old names or codes not in use anymore						For recognised geopolitical entities in FaEu			In blue, not used by FaEu, but corresponds to TDWG
1					Europe
1	10				Europe	Northern Europe
1	10	DEN			Europe	Northern Europe	Denmark		DK
1	10	DEN	OO	DEN-OO	Europe	Northern Europe	Denmark	Denmark	DK	DK	DK	DNK	Denmark	208			DK-DEN	Danish mainland	Incl. Borholm I.	Da	Denmark (Dania), including Bornholm, excluding Faeroe Islands and Greenland	DEN-OO	DK
											DK	DNK	Denmark	208	DK-040	Bornholm
1	10	FIN			Europe	Northern Europe	Finland		FI
1	10	FIN	OO	FIN-OO	Europe	Northern Europe	Finland	Finland	FI	FI	FI	FIN	Finland	246			FI	Finland		Fe	Finland (Fennia), including Ahvenanmaa (Aaland Islands)	FIN-OO	FI
1	10	FOR			Europe	Northern Europe	Føroyar		FO
1	10	FOR	OO	FOR-OO	Europe	Northern Europe	Føroyar	Føroyar	FO	FO	FO	FRO	Faroe Islands	234			DK-FOR	Faroe Is.		Fa	Faeroe Islands	FOR-OO	FO
1	10	GRB			Europe	Northern Europe	Great Britain		UK
1	10	GRB	OO	GRB-OO	Europe	Northern Europe	Great Britain	Great Britain	UK	UK	GB	GBR	United Kingdom	826			GB-GRB	Britain Is.	Incl. Shetlands, Orkneys, Hebrides and Man Is.	Br	Great Britain, including Orkneys, Shetland, Isle of Man; excluding Channel Is., Northern Ireland.	GRB-OO	UK
											GB	GBR	United Kingdom	826	GB-ENG	England
											GB	GBR	United Kingdom	826	GB-SCT	Scotland
											GB	GBR	United Kingdom	826	GB-WLS	Wales
											GB	GBR	United Kingdom	826	GB-EAW	England and Wales
											GB	GBR	United Kingdom	826	GB-GBN	Great Britain
											GB	GBR	United Kingdom	826	GB-UKM	United kingdom
											GB	GBR	United Kingdom	826	GB-IOM	Isle of Man
											GB	GBR	United Kingdom	826	GB-ORK	Orkneys Is.
											GB	GBR	United Kingdom	826	GB-ZET	Shetlands Is.
											GB	GBR	United Kingdom	826	?	Western Isles			= Outer Hebrides Is.?
1	10	ICE			Europe	Northern Europe	Iceland		IS
1	10	ICE	OO	ICE-OO	Europe	Northern Europe	Iceland	Iceland	IS	IS	IS	ISL	Iceland	352			IS	Iceland		Is	Iceland (Islandia)	ICE-OO	IS
1	10	IRE			Europe	Northern Europe	Ireland													Hb	Ireland (Hibernia). This comprises the following:		-
1	10	IRE	IR	IRE-IR	Europe	Northern Europe	Ireland	Ireland		IE	IE	IRL	Ireland	372			IE	Ireland		Hb(e)	Ireland	IRE-IR	IE
1	10	IRE	NI	IRE-NI	Europe	Northern Europe	Ireland	Northern Ireland		UK	GB	GBR	United Kingdom	826			GB-NI	Northern Ireland		Hb(N)	Northern Ireland	IRE-NI	UK
1	10	NOR			Europe	Northern Europe	Norway		NO
1	10	NOR	OO	NOR-OO	Europe	Northern Europe	Norway	Norway	NO	NO	NO	NOR	Norway	578			NO-NOR	Norwegian mainland		No	Norway excluding Svalbard (Sb)	NOR-OO	NO
1	10	SVA			Europe	Northern Europe	Svalbard		SJ
1	10	SVA	OO	SVA-OO	Europe	Northern Europe	Svalbard	Svalbard	SJ	SJ	SJ	SJM	Svalbard and Jan Mayen Islands	744			NO-SVA	Svalbard & Jan Mayen	Incl. Bear I.	Sb	Svalbard, comprising Spitsbergen, Björnöya (Bear Island) and Jan Mayen.	SVA-OO	SJ
											SJ	SJM	Svalbard and Jan Mayen Islands	744	NO-21	Svalbard
											SJ	SJM	Svalbard and Jan Mayen Islands	744	NO-22	Jan Mayen
1	10	SWE			Europe	Northern Europe	Sweden		SE
1	10	SWE	OO	SWE-OO	Europe	Northern Europe	Sweden	Sweden	SE	SE	SE	SWE	Sweden	752			SE	Sweden	Incl. Gotland I.	Su	Sweden (Suecia), including Öland and Gotland.	SWE-OO	SE
											SE	SWE	Sweden	752	SE-I or SE-09	Gotlands Län
1	11				Europe	Middle Europe
1	11	AUT			Europe	Middle Europe	Austria													Au	Austria with Liechtenstein. This has been subdivided as follows:		-
1	11	AUT	AU	AUT-AU	Europe	Middle Europe	Austria	Austria		AT	AT	AUT	Austria	040			AT	Austria		Au(A)	Austria	AUT-AU	AT
1	11	AUT	LI	AUT-LI	Europe	Middle Europe	Austria	Liechtenstein		LI	LI	LIE	Liechtenstein	438			LI	Liechtenstein		Au(L)	Liechtenstein	AUT-LI	LI
1	11	BGM			Europe	Middle Europe	Belgium													Be	Belgium, with Luxembourg. This comprises:		-
1	11	BGM	BE	BGM-BE	Europe	Middle Europe	Belgium	Belgium		BE	BE	BEL	Belgium	056			BE	Belgium		Be(B)	Belgium	BGM-BE	BE
1	11	BGM	LU	BGM-LU	Europe	Middle Europe	Belgium	Luxembourg		LU	LU	LUX	Luxembourg	442			LU	Luxembourg		Be(L)	Luxembourg	BGM-LU	LU
1	11	CZE			Europe	Middle Europe	Czechoslovakia		CS		CSHH	CSHH	Czechoslovakia	200
1	11	CZE	CZ	CZE-CZ	Europe	Middle Europe	Czechoslovakia	Czech Republic	SK	SK	CZ	CZE	Czech Republic	203			CZ	Czech Republic		Cs	Czech Republic	CZE-CZ	CZ
1	11	CZE	SK	CZE-SK	Europe	Middle Europe	Czechoslovakia	Slovakia	CZ	CZ	SK	SVK	Slovakia	703			SK	Slovakia		Sk	Slovakia	CZE-SK	SK
1	11	GER			Europe	Middle Europe	Germany		DE
1	11	GER	OO	GER-OO	Europe	Middle Europe	Germany	Germany	DE	DE	DE	DEU	Germany, Federal Republic of	276			DE	Germany		Ge	Germany	GER-OO	DE
1	11	HUN			Europe	Middle Europe	Hungary		HU
1	11	HUN	OO	HUN-OO	Europe	Middle Europe	Hungary	Hungary	HU	HU	HU	HUN	Hungary	348			HU	Hungary		Hu	Hungary	HUN-OO	HU
1	11	NET			Europe	Middle Europe	Netherlands		NL
1	11	NET	OO	NET-OO	Europe	Middle Europe	Netherlands	Netherlands	NL	NL	NL	NLD	Netherlands	528			NL	The Netherlands		Ho	Netherlands (Hollandia)	NET-OO	NL
1	11	POL			Europe	Middle Europe	Poland		PL
1	11	POL	OO	POL-OO	Europe	Middle Europe	Poland	Poland	PL	PL	PL	POL	Poland	616			PL	Poland		Po	Poland	POL-OO	PL
1	11	SWI			Europe	Middle Europe	Switzerland		CH
1	11	SWI	OO	SWI-OO	Europe	Middle Europe	Switzerland	Switzerland	CH	CH	CH	CHE	Switzerland	756			CH	Switzerland		He	Switzerland (Helvetia)	SWI-OO	CH
1	12				Europe	Southwestern Europe
1	12	BAL			Europe	Southwestern Europe	Baleares		ES
1	12	BAL	OO	BAL-OO	Europe	Southwestern Europe	Baleares	Baleares	ES	ES	ES	ESP	Spain	724	ES-PM	Islas Baleares	ES-BAL	Balearic Is.	Incl. Mallorca I., Menorca I., and Pityuses Is. (=Ibiza I. + Formentera I.)	Bl	Baleares. This has been subdivided as follows:	BAL-OO	ES
																				Bl(I)	Ibiza including Formentera	BAL-OO	ES
																				Bl(M)	Mallorca	BAL-OO	ES
																				Bl(N)	Menorca	BAL-OO	ES
1	12	COR			Europe	Southwestern Europe	Corse		FR
1	12	COR	OO	COR-OO	Europe	Southwestern Europe	Corse	Corse	FR	FR	FR	FRA	France	250	FR-H	Corse	FR-COR	Corsica		Co	Corse	COR-OO	FR
1	12	FRA			Europe	Southwestern Europe	France
1	12	FRA	CI	FRA-CI	Europe	Southwestern Europe	France	Channel Is		UK	GB	GBR	United Kingdom	826	GB-CHA	Channel Islands	GB-CI	Channel Is.	Incl. Jersey, Guernsey, Alderney	Ga(C)	Channel Is.	FRA-CI	UK
											GB	GBR	United Kingdom	826	GB-GSY	Guernsey
											GB	GBR	United Kingdom	826	GB-JSY	Jersey
1	12	FRA	FR	FRA-FR	Europe	Southwestern Europe	France	France		FR	FR	FRA	France	250			FR-FRA	French mainland		Ga(F)	France	FRA-FR	FR
1	12	FRA	MO	FRA-MO	Europe	Southwestern Europe	France	Monaco		MC	MC	MCO	Monaco	492			MC	Monaco		Ga(M)	Monaco	FRA-MO	MC
1	12	POR			Europe	Southwestern Europe	Portugal		PT
1	12	POR	OO	POR-OO	Europe	Southwestern Europe	Portugal	Portugal	PT	PT	PT	PRT	Portugal	620			PT-POR	Portuguese mainland		Lu	Portugal (Lusitania)	POR-OO	PT
1	12	SAR			Europe	Southwestern Europe	Sardegna		IT
1	12	SAR	OO	SAR-OO	Europe	Southwestern Europe	Sardegna	Sardegna	IT	IT	IT	ITA	Italy	380	IT-88	Sardegna	IT-SAR	Sardinia		Sa	Sardegna	SAR-OO	IT
1	12	SPA			Europe	Southwestern Europe	Spain													Hs	Spain (Hispania), with Gibraltar and Andorra; excluding Baleares. This comprises the following:
1	12	SPA	AN	SPA-AN	Europe	Southwestern Europe	Spain	Andorra		AD	AD	AND	Andorra	020			AD	Andorra		Ha(A)	Andorra	SPA-AN	AD
1	12	SPA	GI	SPA-GI	Europe	Southwestern Europe	Spain	Gibraltar		GI	GI	GIB	Gibraltar	292			GB-GI	Gibraltar		Hs(G)	Gibraltar	SPA-GI	GI
1	12	SPA	SP	SPA-SP	Europe	Southwestern Europe	Spain	Spain		ES	ES	ESP	Spain	724			ES-SPA	Spanish mainland	Incl. Alboran I.	Hs(S)	Spain	SPA-SP	ES
1	13				Europe	Southeastern Europe
1	13	ALB			Europe	Southeastern Europe	Albania		AL
1	13	ALB	OO	ALB-OO	Europe	Southeastern Europe	Albania	Albania	AL	AL	AL	ALB	Albania	008			AL	Albania		Al	Albania	ALB-OO	AL
1	13	BUL			Europe	Southeastern Europe	Bulgaria		BG
1	13	BUL	OO	BUL-OO	Europe	Southeastern Europe	Bulgaria	Bulgaria	BG	BG	BG	BGR	Bulgaria	100			BG	Bulgaria		Bu	Bulgaria	BUL-OO	BG
1	13	GRC			Europe	Southeastern Europe	Greece		GR											Gr	Greece, excluding the islands included under Kriti and the Greek East Aegean Islands, AE (G)	GRC-OO	GR
1	13	GRC	OO	GRC-OO	Europe	Southeastern Europe	Greece	Greece	GR	GR	GR	GRC	Greece	300			GR-GRC	Greek mainland	Incl. GreekIonian Is, Evia I., Sporades Is., North Aegean Is. even if closer to Asian Turkey
											GR	GRC	Greece	300	GR-82	Kyklades	GR-CYC	Cyclades Is.	Incl. Amorgos, Anáfi, Andros, Antiparos, Denoúsa, Folegandros, Ios, Káros, Kímolos, Krea, Kythnos, Milos, Mykonos, Naxos, Paros, Poliáigos, Santorini, Serifos, Sifnos, Sikinos, Syros, Thíra, Tinos, Yiarós
											GR	GRC	Greece	300	GR-VI	Ionioi Nisoi (Ionian Is.)
											GR	GRC	Greece	300	GR-04	Evvoia (Evia I.)
											GR	GRC	Greece	300	GR-81	Dodekanisos	GR-DOD	Dodecanese Is.	Incl. Kalimnos, Karpathos, Kassos, Kos, Leros, Patmos, Rodos, Symi
1	13	ITA			Europe	Southeastern Europe	Italy													It	Italy, including the archipelago Toscano, San Marino, Vatican City; excluding Sardegna and Sicilia. This comprises the following:
1	13	ITA	IT	ITA-IT	Europe	Southeastern Europe	Italy	Italy		IT	IT	ITA	Italy	380			IT-ITA	Italian mainland		It(I)	Italy	ITA-IT	IT
1	13	ITA	SM	ITA-SM	Europe	Southeastern Europe	Italy	San Marino		SM	SM	SMR	San Marino	674			SM	San Marino		It(S)	San Marino	ITA-SM	SM
1	13	ITA	VC	ITA-VC	Europe	Southeastern Europe	Italy	Vatican City		VA	VA	VAT	Vatican City State (Holy See)	336			VA	Vatican City		It(V)	Vatican City	ITA-VC	VA
1	13	KRI			Europe	Southeastern Europe	Kriti		GR
1	13	KRI	OO	KRI-OO	Europe	Southeastern Europe	Kriti	Kriti	GR	GR	GR	GRC	Greece	300	GR-XIII	Kriti	GR-KRI	Crete	Incl. small adjacent islands like Gávdhos	Cr	Kriti (Creta), with Karpathos, Kasos and Gavdhos	KRI-OO	GR
1	13	ROM			Europe	Southeastern Europe	Romania		RO
1	13	ROM	OO	ROM-OO	Europe	Southeastern Europe	Romania	Romania	RO	RO	RO	ROM	Romania	642			RO	Romania		Rm	Romania	ROM-OO	RO
1	13	SIC			Europe	Southeastern Europe	Sicilia
1	13	SIC	MA	SIC-MA	Europe	Southeastern Europe	Sicilia	Malta		MT	MT	MLT	Malta	470			MT	Malta		Si(M)	Malta	SIC-MA	MT
1	13	SIC	SI	SIC-SI	Europe	Southeastern Europe	Sicilia	Sicilia		IT	IT	ITA	Italy	380	IT-82	Sicilia	IT-SI	Sicily	Incl. adjacent Italian islands (Lipari Is., Ustica I., Egadi Is., Pantelleria I., Pelagie Is.)	Si(S)	Sicilia, Ustica, Egadi Islands, Pantelleria, Pelagie islands and Eolie Islands	SIC-SI	IT
1	13	TUE			Europe	Southeastern Europe	Turkey-in-Europe		TR
1	13	TUE	OO	TUE-OO	Europe	Southeastern Europe	Turkey-in-Europe	Turkey-in-Europe	TR	TR	TR	TUR	Turkey	792			TR-TUE	European Turkey	Incl. Imroz I.-Gökçeada, but not those in the Sea of Marmara, nor Turkish East Aegean Islands, i.e. Bozcaada	Tu(E)	Turkey-in-Europe, includes Gökçeada	TUE-OO	TR
1	13	YUG			Europe	Southeastern Europe	Yugoslavia		YU
1	13	YUG			Europe	Southeastern Europe	Yugoslavia	Yugoslavia	YU	YU	YU	YUG	Yugoslavia	890
1	13	YUG	BH	YUG-BH	Europe	Southeastern Europe	Yugoslavia	Bosnia-Herzegovina	YU	BA	BA	BIH	Bosnia and Herzegovina	70						BH	Bosnia-Herzegovina	YUG-BH	BA
1	13	YUG	CR	YUG-CR	Europe	Southeastern Europe	Yugoslavia	Croatia	YU	HR	HR	HRV	Croatia	191						Ct	Croatia	YUG-CR	HR
1	13	YUG	MA	YUG-MA	Europe	Southeastern Europe	Yugoslavia	Macedonia	YU	MK	MK	MKD	Macedonia	807						Mk	The former Jugoslav Republic of Makedonija	YUG-MA	MK
1	13	YUG	SL	YUG-SL	Europe	Southeastern Europe	Yugoslavia	Slovenia	YU	SL	SI	SVN	Slovenia	705						Sl	Slovenia	YUG-SL	SI
1	13	YUG	OO	YUG-OO	Europe	Southeastern Europe	Yugoslavia		YU		SC	SCG	Serbia and Montenegro	891			YU	Serbia and Montenegro	Incl. Serbia, Kosovo, Voivodina, Montenegro	SM	Serbia & Montenegro. This comprises the following areas:		YU
1	13	YUG	KO	YUG-KO	Europe	Southeastern Europe	Yugoslavia	Kosovo	YU	YU	SC	SCG	Serbia and Montenegro	891	SC-KM	Kosovo-Metchija	YU	Serbia and Montenegro		SM(S)	Serbia including Kosovo and Vojvodina	YUG-SEYUG-KO	YU
1	13	YUG	MN	YUG-MN	Europe	Southeastern Europe	Yugoslavia	Montenegro	YU	YU	SC	SCG	Serbia and Montenegro	891	SC-CG	Crna Gora	YU	Serbia and Montenegro		SM(M)	Montenegro	YUG-MN	YU
1	13	YUG	SE	YUG-SE	Europe	Southeastern Europe	Yugoslavia	Serbia	YU	YU	SC	SCG	Serbia and Montenegro	891	SC-SR	Srbija	YU	Serbia and Montenegro	Incl. Voivodina	SM(S)	Serbia including Kosovo and Vojvodina	YUG-SEYUG-KO	YU
											SC	SCG	Serbia and Montenegro	891	SC-VO	Vojvodina				SM(S)	Serbia including Kosovo and Vojvodina	YUG-SEYUG-KO	YU
1	14	BLR			Europe	Eastern Europe	Belarus		BY
1	14	BLR	OO	BLR-OO	Europe	Eastern Europe	Belarus	Belarus	BY	BY	BY	BLS	Belarus	112			BY	Belarus		By	Belarus	BLR-OO	BY
1	14	BLT			Europe	Eastern Europe	Baltic States
1	14	BLT	ES	BLT-ES	Europe	Eastern Europe	Baltic States	Estonia		EE	EE	EST	Estonia	233			EE	Estonia		Es	Estonia	BLT-ES	EE
1	14	BLT	KA	BLT-KA	Europe	Eastern Europe	Baltic States	Kaliningrad		RU	RU	RUS	Russian Federation	643	RU-KGD	Kaliningradskaya Oblast'	RU-KGD	Kaliningrad Region		Rf(K)	Kaliningrad Region	BLT-KA	RU
1	14	BLT	LA	BLT-LA	Europe	Eastern Europe	Baltic States	Latvia		LV	LV	LVA	Latvia	428			LV	Latvia		La	Latvia	BLT-LA	LV
1	14	BLT	LI	BLT-LI	Europe	Eastern Europe	Baltic States	Lithuania		LT	LT	LTU	Lithuania	440			LT	Lithuania		Lt	Lithuania	BLT-LI	LT
1	14	KRY			Europe	Eastern Europe	Krym		UA
1	14	KRY	OO	KRY-OO	Europe	Eastern Europe	Krym	Krym	UA	UA	UA	UKR	Ukraine	804			UA	Ukraine		Uk(K)	Krym	KRY-OO	UA
1	14	RUC			Europe	Eastern Europe	Central European Russia		RU
1	14	RUC	OO	RUC-OO	Europe	Eastern Europe	Central European Russia	Central European Russia	RU	RU	RU	RUS	Russian Federation	643			RU-RUC	Central European Russia		Rf(C)	Central European Russia (comprising the following oblasts and republics: Kostroma, Tver, Yaroslavl, Vladimir, Nizhniy Novgorod, Smolensk, Moscow, Ryazan, Mordovia, Chuvashia, Ulyanovsk, Kaluga, Tula, Lipetsk, Tambov, Penza, Bryansk, Orel or Orlov, Kursk, Voronezh, Belgorod)	RUC-OO	RU
1	14	RUE			Europe	Eastern Europe	East European Russia		RU
1	14	RUE	OO	RUE-OO	Europe	Eastern Europe	East European Russia	East European Russia	RU	RU	RU	RUS	Russian Federation	643			RU-RUE	East European Russia		Rf(E)	Eastern European Russia (comprising the following oblasts and republics: Vyatka, Perm, Udmurtia, Bashkortostan, Tatarstan, Samara, Orenburg)	RUE-OO	RU
1	14	RUN			Europe	Eastern Europe	North European Russia		RU
1	14	RUN	OO	RUN-OO	Europe	Eastern Europe	North European Russia	North European Russia	RU	RU	RU	RUS	Russian Federation	643			RU-RUN	North European Russia		Rf(N)	Northern European Russia (comprising the following oblasts and republics: Arkhangelskaya, Karelia, Komi, Murmansk, Vologda)	RUN-OO	RU
																	RU-FJL	Franz Josef Land	Not incl. Ushakova and Vize Is.	Rf(A)	Novaya Zemlya and Franz-Joseph Land	WSB-OO (partim)	RU
																	RU-NOZ	Novaya Zemlya		Rf(A)	Novaya Zemlya and Franz-Joseph Land	WSB-OO (partim)	RU
1	14	RUS			Europe	Eastern Europe	South European Russia		RU
1	14	RUS	OO	RUS-OO	Europe	Eastern Europe	South European Russia	South European Russia	RU	RU	RU	RUS	Russian Federation	643			RU-RUS	South European Russia		Rf(S)	South European Russia (comprising Saratov, Volgograd, Astrakhan, Rostov, Kalmykiya)	RUS-OO	RU
1	14	RUW			Europe	Eastern Europe	Northwest European Russia		RU
1	14	RUW	OO	RUW-OO	Europe	Eastern Europe	Northwest European Russia	Northwest European Russia	RU	RU	RU	RUS	Russian Federation	643			RU-RUW	Northwest European Russia		Rf(NW)	Northwest European Russia (comprising the following oblasts and republics: Novgorod, Pskov, Leningrad (incl. City of St Petersburg)	RUW-OO	RU
1	14	UKR			Europe	Eastern Europe	Ukraine
1	14	UKR	MO	UKR-MO	Europe	Eastern Europe	Ukraine	Moldova		MD	MD	MDA	Moldova	498			MD	Moldova		Mo	Moldova	UKR-MO	MD
1	14	UKR	UK	UKR-UK	Europe	Eastern Europe	Ukraine	Ukraine		UA	UA	UKR	Ukraine	804			UA	Ukraine		Uk	Ukraine. This has been subdivided as follows:		UA
2	21				Africa	Macaronesia
2	21	AZO		AZO-	Africa	Macaronesia	Azores		PT
2	21	AZO	OO	AZO-OO	Africa	Macaronesia	Azores	Azores	PT	PT	PT	PRT	Portugal	620	PT-20	Região Autónoma da Madeira	PT-AZO	Azores Is.		Az	Azores. This has been subdivided as follows:	AZO-OO	PT
																				Az(C)	Corvo	AZO-OO	PT
																				Az(F)	Faial	AZO-OO	PT
																				Az(L)	Flores	AZO-OO	PT
																				Az(G)	Graciosa	AZO-OO	PT
																				Az(P)	Pico	AZO-OO	PT
																				Az(S)	Santa Maria	AZO-OO	PT
																				Az(J)	São Jorge	AZO-OO	PT
																				Az(M)	São Miguel	AZO-OO	PT
																				Az(T)	Terceira	AZO-OO	PT
2	21	CNY			Africa	Macaronesia	Canary Is		ES
2	21	CNY	OO	CNY-OO	Africa	Macaronesia	Canary Is	Canary Is	ES	ES	ES	ESP	Spain	724	ES-CN	Canarias	ES-CNY	Canary Is.		Ca	Canary Is. This has been subdivided as follows:	CNY-OO	ES
																				Ca(F)	Fuerteventura(including Lobos)	CNY-OO	ES
																				Ca(G)	Gomera	CNY-OO	ES
																				Ca(C)	Gran Canaria	CNY-OO	ES
																				Ca(H)	Hierro	CNY-OO	ES
																				Ca(L)	Lanzarote, including Graciosa and smaller islands	CNY-OO	ES
																				Ca(P)	La Palma	CNY-OO	ES
																				Ca(T)	Tenerife	CNY-OO	ES
2	21	MDR			Africa	Macaronesia	Madeira		PT
2	21	MDR	OO	MDR-OO	Africa	Macaronesia	Madeira	Madeira	PT	PT	PT	PRT	Portugal	620	PT-30	Região Autónoma da Madeira	PT-MDR	Madeira Is.		Md	Madeira. This has been subdivided as follows:	MDR-OO	PT
																				Md(D)	Desertas	MDR-OO	PT
																				Md(M)	Madeira	MDR-OO	PT
																				Md(P)	Porto Santo	MDR-OO	PT
2	21	SEL			Africa	Macaronesia	Selvagens		PT
2	21	SEL	OO	SEL-OO	Africa	Macaronesia	Selvagens	Selvagens	PT	PT	PT	PRT	Portugal	620			PT-SEL	Selvagens Is.		Sg	Selvagens	SEL-OO	PT
3	34				Asia-Temperate	Western Asia
3	34	CYP			Asia-Temperate	Western Asia	Cyprus		CY
3	34	CYP	OO	CYP-OO	Asia-Temperate	Western Asia	Cyprus	Cyprus	CY	CY	CY	CYP	Cyprus	196			CY	Cyprus		Cy	Cyprus	CYP-OO	CY
3	34	EAI			Asia-Temperate	East Aegean Is.	East Aegean Is.		GR
3	34	EAI	OO	EAI-OO	Asia-Temperate	East Aegean Is.	East Aegean Is.	East Aegean Is.	GR	GR	GR	GRC	Greece	300	GR-XI	Voreio Aegaio (North Aegean Is.)	GR-AEG	Aegean Is.	Incl. Andipsará, Áyios, Evstratios, Foúrnoi, Ikaría, Khíos, Lésvos, Límnos, Oinousa, Psará, Sámos, Skópelos Kaloyeroi. Excl. Turkish East Aegean Islands, i.e. Bozcaada and Gökçeada	Ae(G)	Greek East Aegean Islands (excluding Gökçeada)

## Sheet: FaEuGeoUnits_outer_Europe
		TDWG			Fauna Europaea
L1 code	L1 continent	L2 code	L2 region	FaEUCode	FaEuName	Remarks
				For recognised regions in FaEu
1		Europe
1	10	Europe	Northern Europe
1	11	Europe	Middle Europe
1	12	Europe	Southwestern Europe
1	13	Europe	Southeastern Europe
1	14	Europe	Eastern Europe
2		Africa
2	20	Africa	Northern Africa	NAF	North Africa	Not including Sinai Peninsula
2	21	Africa	Macaronesia
2	22	Africa	West Tropical Africa	AFR	Afro-tropical region
2	23	Africa	West-Central Tropical Africa	AFR	Afro-tropical region
2	24	Africa	Northeast Tropical Africa	AFR	Afro-tropical region
2	25	Africa	East Tropical Africa	AFR	Afro-tropical region
2	26	Africa	South Tropical Africa	AFR	Afro-tropical region
2	27	Africa	Southern Africa	AFR	Afro-tropical region
2	28	Africa	Middle Atlantic Ocean	AFR	Afro-tropical region
2	29	Africa	Western Indian Ocean	AFR	Afro-tropical region
3		Asia-Temperate
3	30	Asia-Temperate	Siberia	EPA	East Palaearctic	East of the border line here defined
3	31	Asia-Temperate	Russian Far East	EPA	East Palaearctic	East of the border line here defined
3	32	Asia-Temperate	Middle Asia	EPA	East Palaearctic	East of the border line here defined
3	33	Asia-Temperate	Caucasus	NRE	Near East	Asian Turkey, Caucasian Russian republics, Georgia, Armenia, Azerbaidjan, Lebanon, Syria, Israel, Jordan, Sinai Peninsula (Egypt), Arabian peninsula, Iran, Iraq
3	34	Asia-Temperate	Western Asia	NRE	Near East	Asian Turkey, Caucasian Russian republics, Georgia, Armenia, Azerbaidjan, Lebanon, Syria, Israel, Jordan, Sinai Peninsula (Egypt), Arabian peninsula, Iran, Iraq	-Afganistan, Cyprus
3	35	Asia-Temperate	Arabian Peninsula	NRE	Near East	Asian Turkey, Caucasian Russian republics, Georgia, Armenia, Azerbaidjan, Lebanon, Syria, Israel, Jordan, Sinai Peninsula (Egypt), Arabian peninsula, Iran, Iraq
3	36	Asia-Temperate	China	EPA	East Palaearctic	East of the border line here defined
3	37	Asia-Temperate	Mongolia	EPA	East Palaearctic	East of the border line here defined
3	38	Asia-Temperate	Eastern Asia	EPA	East Palaearctic	East of the border line here defined
4		Asia-Tropical
4	40	Asia-Tropical	Indian Subcontinent	ORR	Oriental region
4	41	Asia-Tropical	Indo-China	ORR	Oriental region
4	42	Asia-Tropical	Malesia	ORR	Oriental region
4	43	Asia-Tropical	Papuasia	ORR	Oriental region
5		Australasia		AUS	Australian region
5	50	Australasia	Australia
5	51	Australasia	New Zealand
6		Pacific		?
6	60	Pacific	Southwestern Pacific
6	61	Pacific	South-Central Pacific
6	62	Pacific	Northwestern Pacific
6	63	Pacific	North-Central Pacific
7		Northern America		NEA	Nearctic region
7	70	Northern America	Subarctic America
7	71	Northern America	Western Canada
7	72	Northern America	Eastern Canada
7	73	Northern America	Northwestern U.S.A.
7	74	Northern America	North-Central U.S.A.
7	75	Northern America	Northeastern U.S.A.
7	76	Northern America	Southwestern U.S.A.
7	77	Northern America	South-Central U.S.A.
7	78	Northern America	Southeastern U.S.A.
7	79	Northern America	Mexico
8		Southern America		NEO	Neotropical region
8	80	Southern America	Central America
8	81	Southern America	Caribbean
8	82	Southern America	Northern South America
8	83	Southern America	Western South America
8	84	Southern America	Brazil
8	85	Southern America	Southern South America
9		Antarctic
9	90	Antarctic	Subantarctic Islands
9	91	Antarctic	Antarctic Continent
