# Supplementary material for: Fauna Europaea – all European animal species on the web
Source: Biodivers Data J. 2014 Sep 17;(2):e4034. doi: 10.3897/BDJ.2.e4034 (PMC4206781; doi:10.3897/BDJ.2.e4034)
Supplement: Supplementary material 5 — Fauna Europaea database statistics (source file) [file biodiversity_data_journal-2-e4034-s005.xlsx]

## Sheet: Taxon numbers
Taxa (level)	Accepted (No.)	Synonyms (No.)
All taxon names	221701	52882
Higher taxon names	5838	233
(Sub)genus names	28589	6950
Species names	132100	40354
Subspecies names	14188	5564

## Sheet: Species numbers per family
Family	Group Coordinator (GC_Id)	Species	Species synonyms	Subspecies	Subspecies synonym
Aegialiidae	13	4	12
Agyrtidae	13	6	5
Anthribidae	13	63	45	4	4
Aphodiidae	13	269	309	40	41
Apionidae	13	308	378	46	62
Artematopodidae	13	1
Attelabidae	13	6	1
Brachyceridae	13	19	59	1
Brentidae	13	2
Buprestidae	13	436	560	227	416
Byrrhidae	13	114	116	26	46
Cantharidae	13	500	606	30	29
Cerophytidae	13	1	1
Cetoniidae	13	49	6	39	6
Curculionidae	13	4449	2882	595	320
Drilidae	13	19	8	2
Dryophthoridae	13	12	28
Dryopidae	13	21	2
Dynastidae	13	13	3	20	6
Elateridae	13	672	105	21	1
Elmidae	13	43	2	11
Erirhinidae	13	48	3	3
Euchiridae	13	2
Eucnemidae	13	36	9
Geotrupidae	13	59	90	18	27
Glaphyridae	13	23	4	8	1
Glaresidae	13	5	1
Heteroceridae	13	22	58	3	3
Histeridae	13	276	263	40	39
Hybosoridae	13	1	8
Hydraenidae	13	396	48	22
Hydrophilidae	13	263	550	22	28
Lampyridae	13	49	44	17	9
Leiodidae	13	1153	328	566	171
Limnichidae	13	12	7
Lucanidae	13	14	3	6	3
Lycidae	13	12	13
Melolonthidae	13	303	309	43	21
Nanophyidae	13	33	105	5	39
Nemonychidae	13	3	10
Ochodaeidae	13	11	8
Omalisidae	13	12	4	2
Orphnidae	13	9	3	3
Oxycorynidae	13	1
Pachypodidae	13	2	3
Psephenidae	13	1
Ptiliidae	13	131	193
Raymondionymidae	13	51	3	20	4
Rhynchitidae	13	52	11	2
Rutelidae	13	102	7	28	10
Scarabaeidae	13	93	328	9	32
Scydmaenidae	13	529	155	81	44
Silphidae	13	43	207	4	31
Sphaeritidae	13	1
Staphylinidae	13	4750	1876	662	374
Throscidae	13	24	15	2	2
Trogidae	13	23	32	5	3
Acanthocnemidae	18	1	2
Aderidae	18	27	11	4	1
Alexiidae	18	32	10	2
Anobiidae	18	419	535	43
Anthicidae	18	314	43	75	14
Biphyllidae	18	5	1
Boridae	18	1
Bostrichidae	18	42	1	5
Bothrideridae	18	106		5
Byturidae	18	3	3
Carabidae	18	3738	1436	2236	1051
Cerambycidae	18	677	91	182	31
Cerylonidae	18	14
Chrysomelidae	18	1758	319	534	106
Ciidae	18	76	22
Clambidae	18	22		9
Cleridae	18	68	180
Coccinellidae	18	215	459	41	35
Corylophidae	18	37	62
Crowsoniellidae	18	1
Cryptophagidae	18	257	359	8
Cucujidae	18	6
Cybocephalidae	18	26	20	4
Dascillidae	18	3
Dasytidae	18	381	175	34	22
Dermestidae	18	197	46
Derodontidae	18	5
Dytiscidae	18	375	30
Endecatomidae	18	1
Endomychidae	18	79	26
Erotylidae	18	29	48
Eucinetidae	18	8	5
Gietellidae	18	2
Gyrinidae	18	17		2
Haliplidae	18	34	22
Hydroscaphidae	18	2
Hygrobiidae	18	1	1
Jacobsoniidae	18	2
Kateretidae	18	29	50
Laemophloeidae	18	29
Languriidae	18	14	18
Latridiidae	18	192	289	2
Lyctidae	18	13	1	1	1
Lymexylidae	18	3
Malachiidae	18	327	24	15	3
Melandryidae	18	53	103
Meloidae	18	181	215	30	70
Melyridae	18	18	1
Micromalthidae	18	1
Monotomidae	18	34	51	3
Mordellidae	18	256	81	8
Mycetophagidae	18	31	51	2	2
Mycteridae	18	3	1
Nitidulidae	18	248	299
Nosodendridae	18	1
Noteridae	18	4	8
Oedemeridae	18	93	20	29	8
Passandridae	18	1
Phalacridae	18	56	35	1
Phloeostichidae	18	1
Phloiophilidae	18	1
Prionoceridae	18	1	1
Prostomidae	18	1
Pyrochroidae	18	8		2
Pythidae	18	5	1
Rhipiceridae	18	2
Ripiphoridae	18	17	75
Salpingidae	18	19	3
Scirtidae	18	94	10
Scraptiidae	18	102	46	2
Silvanidae	18	40		2
Sphaeriusidae	18	3
Sphindidae	18	4	2
Stenotrachelidae	18	2
Tenebrionidae	18	1392		382
Tetratomidae	18	10	19
Thanerocleridae	18	1	4
Trachypachidae	18	1
Trogositidae	18	25	1
Zopheridae	18	128
Acanthosomatidae	19	8		3
Aepophilidae	19	1
Alydidae	19	12	1
Anthocoridae	19	89		9
Aphelocheiridae	19	3
Aradidae	19	54		4
Belostomatidae	19	1
Berytidae	19	30		10
Ceratocombidae	19	3
Cimicidae	19	8
Coreidae	19	55		3
Corixidae	19	70		13
Cydnidae	19	63		2
Dipsocoridae	19	8
Enicocephalidae	19	1
Gerridae	19	16		4
Hebridae	19	8		1	1
Hydrometridae	19	2
Leptopodidae	19	4
Lygaeidae	19	389	2	40
Mesoveliidae	19	3
Microphysidae	19	18
Miridae	19	1131	17	70
Nabidae	19	42		10
Naucoridae	19	2		4
Nepidae	19	5
Notonectidae	19	13	1	6
Ochteridae	19	1		1
Pentatomidae	19	188	12	14
Piesmatidae	19	11
Plataspididae	19	4
Pleidae	19	1		1
Pyrrhocoridae	19	5		2
Reduviidae	19	115	5
Rhopalidae	19	33		5
Saldidae	19	47		6
Scutelleridae	19	46	1	6
Stenocephalidae	19	7
Thyreocoridae	19	4
Tingidae	19	186	3	13
Veliidae	19	22		9
Chaetonotidae	21	186	170	6	3
Dasydytidae	21	21	19
Dichaeturidae	21	3	2
Neogosseidae	21	3	4	1	1
Turbanellidae	21	1
Ameletidae	26	2	5
Ametropodidae	26	4	2
Arthropleidae	26	1
Baetidae	26	82	42
Behningiidae	26	1
Caenidae	26	18	12
Ephemerellidae	26	13	12
Ephemeridae	26	7	2
Heptageniidae	26	142	33
Isonychiidae	26	1
Leptophlebiidae	26	38	7
Neoephemeridae	26	1	1
Oligoneuriidae	26	8	4
Palingeniidae	26	3
Polymitarcyidae	26	2	1
Potamanthidae	26	1
Prosopistomatidae	26	1	1
Siphlonuridae	26	14	4
Acartiidae	30	10		2
Ameiridae	30	68		14
Argulidae	30	3	5
Armadillidae	30	4
Armadillidiidae	30	244	4
Artemiidae	30	3
Asellidae	30	144
Astacidae	30	6
Atyidae	30	9
Bathynellidae	30	37
Bathytropidae	30	7
Bogidiellidae	30	35
Bosminidae	30	6
Branchinectidae	30	5
Branchipodidae	30	8
Buddelundiellidae	30	15
Caligidae	30	2
Cambaridae	30	3
Candonidae	30	166	34	8	1
Canthocamptidae	30	207		40
Canuellidae	30	3
Centropagidae	30	3
Cercopagidae	30	3
Chappuisiidae	30	2
Chirocephalidae	30	28
Cirolanidae	30	8
Cletodidae	30	4
Corophiidae	30	7
Crangonyctidae	30	3
Cushmanideidae	30	1
Cyclopidae	30	195		107
Cyclopinidae	30	1
Cylisticidae	30	40	1
Cyprididae	30	124	58	5	1
Cytherideidae	30	4	1
Cytheruridae	30	2
Cyzicidae	30	7
Daphniidae	30	45
Darcythompsoniidae	30	2
Darwinulidae	30	4	1
Diaptomidae	30	79		20
Dichelesthiidae	30	1
Ectinosomatidae	30	14
Entocytheridae	30	5		2
Ergasilidae	30	10
Eurycercidae	30	81
Gammaridae	30	183	59	11	4
Gelyellidae	30	2
Grapsidae	30	1
Hadziidae	30	7		2
Halophilosciidae	30	9
Halosbaenidae	30	2
Harpacticidae	30	13
Hemicytheridae	30	2
Holopediidae	30	1
Ilyocyprididae	30	14	5	1
Ingolfiellidae	30	9
Janiridae	30	7
Kliellidae	30	2
Laophontidae	30	20
Lepidomysidae	30	1
Leptestheriidae	30	3
Leptocytheridae	30	14	2
Leptodoridae	30	1
Lernaeidae	30	3
Lernaeopodidae	30	17
Ligiidae	30	19	1
Limnadiidae	30	2
Limnocytheridae	30	21	3
Linderiellidae	30	1
Linguatulidae	30	1
Loxoconchidae	30	8	1
Lynceidae	30	2
Macrothricidae	30	21
Melitidae	30	3
Mesoniscidae	30	5
Metacrangonyctidae	30	1
Metaingolfiellidae	30	1
Metidae	30	2
Microcerberidae	30	4
Microparasellidae	30	43
Miraciidae	30	28		2
Moinidae	30	11
Monodellidae	30	7
Mysidae	30	20
Niphargidae	30	210		99
Notodromadidae	30	3	1	2
Oniscidae	30	20
Palaemonidae	30	2
Parabathynellidae	30	30
Paradoxostomatidae	30	2
Parastacidae	30	1
Parastenocarididae	30	94		9
Philosciidae	30	39	2
Phyllognathopodidae	30	3
Platyarthridae	30	30	2
Podonidae	30	3
Polyartemiidae	30	1
Polyphemidae	30	1
Pontocyprididae	30	1
Porcellionidae	30	229	3
Potamonidae	30	3
Pseudodiaptomidae	30	1
Reighardiidae	30	2
Salentinellidae	30	12		2
Scleropactidae	30	3	1
Scyphacidae	30	7	1
Sididae	30	9	1
Spelaeoniscidae	30	8
Sphaeromatidae	30	20
Stenasellidae	30	18
Stenoniscidae	30	2
Streptocephalidae	30	1
Stygiomysidae	30	1
Styloniscidae	30	13
Tachidiidae	30	7
Temoridae	30	10
Tendosphaeridae	30	6
Thamnocephalidae	30	1
Tisbidae	30	9
Trachelipodidae	30	80	4
Trichoniscidae	30	430	1
Triopsidae	30	5
Tylidae	30	5
Typhlocarididae	30	1
Xestoleberididae	30	1
Aclerdidae	32	3
Aleyrodidae	32	57
Asterolecaniidae	32	17
Beesoniidae	32	1
Calophyidae	32	1
Cerococcidae	32	8
Coccidae	32	142	8	4
Dactylopiidae	32	1
Diaspididae	32	213	1
Eriococcidae	32	88		4
Homotomidae	32	1
Kermesidae	32	12
Lecanodiaspididae	32	1
Margarodidae	32	24	4
Micrococcidae	32	3
Ortheziidae	32	11
Phoenicococcidae	32	1
Pseudococcidae	32	325	49	14	2
Psyllidae	32	275	1
Triozidae	32	105
Amblyommidae	33	31	95	8
Argasidae	33	15	21
Ixodidae	33	31	85
Buthidae	36	6	23	2
Euscorpiidae	36	14	47	12	2
Iuridae	36	2	2	2	1
Troglotayosicidae	36	1
Actaletidae	41	1
Arrhopalitidae	41	41	1
Bourletiellidae	41	55	13
Brachystomellidae	41	6	1
Cyphoderidae	41	11	1
Dicyrtomidae	41	15	3	11	3
Entomobryidae	41	360	109	20	13
Hypogastruridae	41	199	98	4	1
Isotogastruridae	41	1
Isotomidae	41	378	167	2
Katiannidae	41	21	6	3	1
Mackenziellidae	41	1
Neanuridae	41	300	64	20	1
Neelidae	41	8	4
Odontellidae	41	38	3	2
Oncopoduridae	41	15
Onychiuridae	41	314	31
Paronellidae	41	9
Poduridae	41	1
Sminthuridae	41	29	5
Sminthurididae	41	21	10
Tomoceridae	41	29	2
Tullbergiidae	41	88	12	4	1
Andrognathidae	42	6	3
Anthogonidae	42	28	10
Anthroleucosomatidae	42	44	11
Attemsiidae	42	25	23
Biokoviellidae	42	1
Blaniulidae	42	46	24
Brachychaeteumatidae	42	8	5
Brachypauropodidae	42	6
Callipodidae	42	5	19
Chamaesomatidae	42	26	2
Charinidae	42	1
Chelodesmidae	42	2
Chordeumatidae	42	24	6
Craspedosomatidae	42	188	110
Cryptopidae	42	25	19
Dignathodontidae	42	14	29
Diplomaragnidae	42	1
Dorypetalidae	42	9
Entomobielziidae	42	4
Eurypauropodidae	42	18
Faginidae	42	1
Galliobatidae	42	1	1
Geophilidae	42	86	84
Glomeridae	42	124	56
Glomeridellidae	42	11	4
Haaseidae	42	23	9
Haplobainosomatidae	42	8
Haplodesmidae	42	2	1
Henicopidae	42	5	6
Heterolatzeliidae	42	2	3
Himantariidae	42	16	30	2	3
Hirudisomatidae	42	9	1
Hubbardiidae	42	1
Julidae	42	522	264
Linotaeniidae	42	9	28
Lithobiidae	42	271	430	55	114
Lophoproctidae	42	5	2
Lusitaniosomatidae	42	1
Macrosternodesmidae	42	4	3
Mastigophorophyllidae	42	38	13
Mecistocephalidae	42	1
Nemasomatidae	42	2	3
Neoatractosomatidae	42	24	5
Oniscodesmidae	42	1
Opisthocheiridae	42	29	4
Oryidae	42	2
Paradoxosomatidae	42	39	25
Pauropodidae	42	101
Plutoniumidae	42	2
Polydesmidae	42	197	183
Polyxenidae	42	13	2
Polyzoniidae	42	3	5
Protoglomeridae	42	3	2
Pyrgodesmidae	42	5
Rhopaloiulidae	42	2	2
Schendylidae	42	38	17
Schizopetalidae	42	39	41
Scolopendrellidae	42	13
Scolopendridae	42	8	6
Scutigerellidae	42	28
Scutigeridae	42	4	20
Siphonocryptidae	42	1
Siphonotidae	42	1
Spirobolellidae	42	1	2
Synxenidae	42	1
Trachygonidae	42	6	3
Trichoblaniulidae	42	4
Trichonemasomatidae	42	1
Trichopolydesmidae	42	14
Vandeleumatidae	42	11
Verhoeffiidae	42	4	2
Xystodesmidae	42	9	6
Acanthocolpidae	51	3	2
Acanthostomidae	51	2
Acoleidae	51	4	1
Acrobothriidae	51	5
Acuariidae	51	96		1
Agfidae	51	2
Alirhabditidae	51	1
Allantonematidae	51	78
Allocreadiidae	51	15	1	2
Amabiliidae	51	13	2
Amidostomidae	51	12	15
Amphilinidae	51	1
Ancylostomatidae	51	12	1
Ancyrocephalidae	51	34
Angiostomatidae	51	5
Angiostrongylidae	51	15
Anguillicolidae	51	2
Anisakidae	51	30	4
Anoplocephalidae	51	49	6	2
Apororhynchidae	51	2
Aproctidae	51	11	1
Arhythmacanthidae	51	3
Ascarididae	51	34	5
Ascaridiidae	51	10	1
Aspidogastridae	51	2	1
Atractidae	51	4
Auridistomidae	51	2	1
Azygiidae	51	3
Bothriocephalidae	51	9	1
Brachycoeliidae	51	1	1
Brachylaimidae	51	28	3
Bucephalidae	51	5	3
Bunocotylidae	51	5
Camallanidae	51	5	1
Capillariidae	51	121	15
Capsalidae	51	1
Carabonematidae	51	1
Caryophyllaeidae	51	15	2
Catenotaeniidae	51	7
Cathaemasiidae	51	2	2
Centrorhynchidae	51	23	1
Cephalochlamydidae	51	1
Cephalogonimidae	51	2
Chabertiidae	51	10	1
Cladorchiidae	51	6	1
Clinostomidae	51	4	1
Collyriclidae	51	4
Cosmocercidae	51	15	2
Crenosomatidae	51	13
Cryptogonimidae	51	1
Cucullanidae	51	7	2
Cyathocotylidae	51	19	3
Cyclocoelidae	51	28	12
Cystidicolidae	51	12	2
Cystoopsidae	51	1
Dactylogyridae	51	125
Daniconematidae	51	1
Davaineidae	51	66	2
Derogenidae	51	4
Desmidocercidae	51	3
Diaphanocephalidae	51	3
Diclybothriidae	51	1
Dicrocoeliidae	51	88	6	1
Dictyocaulidae	51	8	1
Dilepididae	51	201	23
Dioctophymatidae	51	9	1
Dioecocestidae	51	4	1
Diphyllobothriidae	51	23
Diplectanidae	51	1
Diplodiscidae	51	1	1
Diplostomidae	51	67	20
Diplotriaenidae	51	22	6
Diplozoidae	51	20	1	2
Dipylidiidae	51	11	3
Discocotylidae	51	1
Dracunculidae	51	4
Drilonematidae	51	9
Echinorhynchidae	51	22	4
Echinostomatidae	51	153	10	2
Ektaphelenchidae	51	14
Entaphelenchidae	51	7
Eucotylidae	51	12	5
Eumegacetidae	51	10	1	1
Fasciolidae	51	5	1
Faustulidae	51	2
Filariidae	51	7	2
Filaroididae	51	7
Gastrodiscidae	51	1
Gastrothylacidae	51	1
Gigantorhynchidae	51	12	3
Gnathostomatidae	51	7
Gongylonematidae	51	12	2
Gorgoderidae	51	30	2
Gymnophallidae	51	19	2
Gyrodactylidae	51	117	2
Habronematidae	51	24
Haploporidae	51	5
Haplosplanchnidae	51	1
Hartertiidae	51	4
Hedruridae	51	1
Heligmonellidae	51	10	5
Heligmosomidae	51	26	8	1
Hemiuridae	51	9	3
Heterakidae	51	11	1
Heterophyidae	51	54	2
Heterorhabditidae	51	4
Heteroxynematidae	51	14	1
Hymenolepididae	51	343	46	2
Iagotrematidae	51	2
Illiosentidae	51	3
Iotonchiidae	51	9
Kathlaniidae	51	5
Kiwinematidae	51	2
Lecithasteridae	51	1
Lecithodendriidae	51	89	15
Leucochloridiidae	51	15	10
Leucochloridiomorphidae	51	2
Lytocestidae	51	9
Macroderidae	51	1	1
Mazocraeidae	51	1
Mermithidae	51	34
Mesocestoididae	51	12	1
Mesotretidae	51	1
Metadilepididae	51	3
Metastrongylidae	51	7	1
Microcotylidae	51	2
Microphallidae	51	54	11
Molineidae	51	41	4	2
Moniliformidae	51	3
Monorchiidae	51	13	1
Muspiceidae	51	2
Nanophyetidae	51	3
Nematotaeniidae	51	4
Neoechinorhynchidae	51	4
Notocotylidae	51	39	2
Octomacridae	51	1
Oligacanthorhynchidae	51	15	1
Omphalometridae	51	2	1
Onchocercidae	51	67	12
Opecoelidae	51	21	3
Opisthorchiidae	51	35	4	1
Orchipedidae	51	5
Ornithostrongylidae	51	3
Oxyuridae	51	28	2
Pachypsolidae	51	1
Panopistidae	51	5	1
Paramphistomidae	51	11	1
Parasitaphelenchidae	51	41	2
Parasitylenchidae	51	34
Paruterinidae	51	40	7
Paurodontidae	51	1
Pharyngodonidae	51	43	1	1
Philometridae	51	10	3
Philophthalmidae	51	24	1
Physalopteridae	51	23		2
Plagiorchiidae	51	91	17	4
Plagiorhynchidae	51	17	2
Pneumospiruridae	51	1
Polymorphidae	51	28	12	1
Polystomatidae	51	14
Pomphorhynchidae	51	5
Progynotaeniidae	51	8
Pronocephalidae	51	4
Prosthogonimidae	51	12	5
Proteocephalidae	51	24	1
Protostrongylidae	51	25	1	2
Pseudaliidae	51	2
Pseudonymidae	51	4
Psilostomidae	51	23	1
Quadrigyridae	51	1
Quimperiidae	51	2	1
Renicolidae	51	27	1
Rhabdiasidae	51	11
Rhabdochonidae	51	10	3
Rhadinorhynchidae	51	1
Rictulariidae	51	13
Robertdollfusidae	51	2
Sanguinicolidae	51	6
Schistosomatidae	51	19	2
Seuratidae	51	6		2
Skrjabillanidae	51	8	1
Skrjabingylidae	51	2
Soboliphymatidae	51	3
Sphaerulariidae	51	3
Spirocercidae	51	10	1
Spirorchiidae	51	1
Spiruridae	51	6	1	1
Steinernematidae	51	9
Stomylotrematidae	51	3
Strigeidae	51	45	10
Strongylacanthidae	51	2
Strongylidae	51	47	5
Strongyloididae	51	23
Subuluridae	51	16		1
Syngamidae	51	15
Syrphonematidae	51	1
Taeniidae	51	26	11	1
Telorchiidae	51	9
Tenuisentidae	51	1
Tetrabothriidae	51	11	1
Tetrameridae	51	26
Tetraonchidae	51	6
Thapariellidae	51	1
Thelastomatidae	51	28
Thelaziidae	51	14
Travassosinematidae	51	4
Triaenophoridae	51	10
Trichinellidae	51	6
Trichosomoididae	51	3
Trichostrongylidae	51	78	11
Trichuridae	51	21	3
Troglotrematidae	51	3	1
Typhlocoelidae	51	4
Zoogonidae	51	2
Acrididae	55	331	24	15
Amorphoscelididae	55	1
Anisolabididae	55	11	16
Bacillidae	55	7	1
Blaberidae	55	4
Blattellidae	55	140	12	4
Blattidae	55	4
Bradyporidae	55	85		4
Conocephalidae	55	11	1	1
Embiidae	55	9
Empusidae	55	5
Forficulidae	55	62	45
Gryllidae	55	81	7	1
Gryllotalpidae	55	14
Heteronemiidae	55	6
Kalotermitidae	55	4
Labiduridae	55	2	45
Mantidae	55	30	2
Meconematidae	55	10
Mogoplistidae	55	11
Myrmecophilidae	55	9
Oligotomidae	55	4
Pamphagidae	55	52	1	3
Phaneropteridae	55	156	10	7
Phasmatidae	55	4
Polyphagidae	55	8	4
Pygidicranidae	55	3
Pyrgomorphidae	55	5
Rhaphidophoridae	55	49	4
Rhinotermitidae	55	7	1
Spongiphoridae	55	5	15
Termitidae	55	1
Tetrigidae	55	12	5
Tettigoniidae	55	222	8	13
Tridactylidae	55	6
Achilidae	56	9	1
Aphrophoridae	56	29	14
Caliscelidae	56	18	7
Cercopidae	56	7	2
Cicadellidae	56	1220	660	16	4
Cicadidae	56	10	19	1
Cixiidae	56	144	37	5
Delphacidae	56	255	220	4	2
Derbidae	56	4
Dictyopharidae	56	55	5
Flatidae	56	36	4
Issidae	56	150	40
Kinnaridae	56	2
Meenoplidae	56	5	1
Membracidae	56	5	1
Ricaniidae	56	2
Tettigometridae	56	45	15
Tibicinidae	56	48	18	2
Tropiduchidae	56	3	1
Ulopidae	56	6	3
Acanthopteroctetidae	63	1
Adelidae	63	50	31
Alucitidae	63	23	8
Argyresthiidae	63	46	6
Autostichidae	63	131	40	6
Batrachedridae	63	3	3
Bedelliidae	63	3
Blastobasidae	63	51	15
Brachodidae	63	15	12
Brahmaeidae	63	6
Bucculatricidae	63	55	9	1
Carposinidae	63	7	1
Castniidae	63	1
Chimabachidae	63	3	1
Choreutidae	63	17	2
Cimeliidae	63	3		2
Coleophoridae	63	568	155	2
Cosmopterigidae	63	83	53
Cossidae	63	32	1	4
Crambidae	63	488	124	5
Douglasiidae	63	13	3
Drepanidae	63	21	1	2
Elachistidae	63	470	134	20
Endromidae	63	2
Epermeniidae	63	24	18	1
Epipyropidae	63	2
Erebidae	63	353	31	38	1
Eriocottidae	63	8
Eriocraniidae	63	9	3
Euteliidae	63	2
Galacticidae	63	3
Gelechiidae	63	769	94	38	3
Geometridae	63	1050	341	634	3
Glyphipterigidae	63	43	24	2
Gracillariidae	63	251	48	2
Heliodinidae	63	1
Heliozelidae	63	10	6
Hepialidae	63	16		2
Hesperiidae	63	46	27	2
Heterogynidae	63	7	2
Incurvariidae	63	14	5
Lasiocampidae	63	45	2	37
Lecithoceridae	63	10	7
Limacodidae	63	5
Lycaenidae	63	131	87	21	2
Lyonetiidae	63	30	3
Lypusidae	63	21	3
Micropterigidae	63	47	12	3
Millieridae	63	1
Momphidae	63	19	26
Nepticulidae	63	265	174
Noctuidae	63	1280	126	435	5
Nolidae	63	41	1
Notodontidae	63	55	9	46	2
Nymphalidae	63	242	177	14	6
Oecophoridae	63	123	24	16	2
Opostegidae	63	6	5
Papilionidae	63	13	9	3	4
Peleopodidae	63	1
Pieridae	63	56	22	2
Plutellidae	63	23	2
Praydidae	63	8
Prodoxidae	63	18	3
Psychidae	63	238	22	29
Pterolonchidae	63	6	4
Pterophoridae	63	168	227	2
Pyralidae	63	470	171	6	13
Riodinidae	63	1
Roeslerstammiidae	63	2
Saturniidae	63	10	2	4
Schreckensteiniidae	63	1
Scythrididae	63	201	5
Sesiidae	63	116	32	31	2
Somabrachyidae	63	1
Sphingidae	63	40	105	17	48
Stathmopodidae	63	9	5
Thyrididae	63	1
Tineidae	63	279	177	10
Tischeriidae	63	12	1
Tortricidae	63	994	226
Uraniidae	63	1
Urodidae	63	1
Yponomeutidae	63	63	11
Ypsolophidae	63	44	5
Zygaenidae	63	67	6	349	1
Ameroseiidae	69	34
Antennophoridae	69	1
Arctacaridae	69	1
Ascidae	69	151
Asternoseiidae	69	1
Celaenopsidae	69	3
Dermanyssidae	69	8
Digamasellidae	69	65
Epicriidae	69	8
Eviphididae	69	29
Halarachnidae	69	2
Halolaelapidae	69	37
Ichthyostomatogasteridae	69	1
Iphiopsidae	69	1
Ixodorhynchidae	69	1
Laelapidae	69	153		2
Macrochelidae	69	80
Macronyssidae	69	15
Messoracaridae	69	1
Metagynuridae	69	2
Microgyniidae	69	1
Ologamasidae	69	24
Pachylaelapidae	69	58	1
Parantennulidae	69	1
Parasitidae	69	181
Parholaspididae	69	22
Phaulodinychidae	69	13
Phytoseiidae	69	164	9
Podocinidae	69	3
Polyaspididae	69	42
Protodinychidae	69	1
Raillietiidae	69	1
Rhinonyssidae	69	3
Rhodacaridae	69	36
Seiodidae	69	2
Sejidae	69	5
Spinturnicidae	69	6
Thinozerconidae	69	1
Trachyuropodidae	69	37
Trematuridae	69	62
Uroactiniidae	69	2
Urodinychidae	69	57
Uropodidae	69	40
Varroidae	69	1
Veigaiidae	69	30
Zerconidae	69	92
Apataniidae	73	26	9
Arctopsychidae	73	1	2
Beraeidae	73	33	11
Brachycentridae	73	19	16
Calamoceratidae	73	2	1
Ecnomidae	73	2	2
Glossosomatidae	73	52	20
Goeridae	73	14	20
Helicopsychidae	73	5	2
Hydropsychidae	73	70	45	2
Hydroptilidae	73	117	28
Lepidostomatidae	73	9	12
Leptoceridae	73	81	86	10
Limnephilidae	73	304	206	14
Molannidae	73	5	10
Odontoceridae	73	3	5
Philopotamidae	73	33	13
Phryganeidae	73	20	24
Polycentropodidae	73	57	25	10	1
Psychomyiidae	73	69	35	1
Ptilocolepidae	73	2	2
Rhyacophilidae	73	95	32	16	2
Sericostomatidae	73	26	20
Uenoidae	73	4
Malawispongiidae	74	3
Spongillidae	74	15
Cladonychiidae	75	8
Dicranolasmatidae	75	13
Ischyropsalididae	75	18		4
Nemastomatidae	75	56		9
Phalangiidae	75	142		4
Phalangodidae	75	18
Sabaconidae	75	6		2
Sclerosomatidae	75	2
Sironidae	75	17		2
Travuniidae	75	13
Trogulidae	75	37		2
Calohypsibiidae	77	10
Carphaniidae	77	1
Echiniscidae	77	103	1	12
Eohypsibiidae	77	7
Hypsibiidae	77	102	1	3
Isohypsibiidae	77	96	3	2
Macrobiotidae	77	89	2	1
Microhypsibiidae	77	3
Milnesiidae	77	1		1
Murrayidae	77	12	1
Necopinatidae	77	1
Oreellidae	77	1	3
Parachelaincertaeseidae	77	2
Lepismatidae	78	41	28	3	9
Machilidae	78	196	37	13	4
Meinertellidae	78	17		1
Nicoletiidae	78	19	3
Bovicoliidae	79	13	1	5	3
Echinophthiriidae	79	3
Enderleinellidae	79	4
Gliricolidae	79	2
Goniodidae	79	31	1	9
Gyropidae	79	1
Haematopinidae	79	5		2
Hoplopleuridae	79	11		4
Laemobothriidae	79	5		16	4
Linognathidae	79	10	1	3	1
Menoponidae	79	202	19	125	24
Pedicinidae	79	1
Pediculidae	79	2
Philopteridae	79	383	21	263	19
Polyplacidae	79	20	1	5
Pthiridae	79	1
Ricinidae	79	9		13	7
Trichodectidae	79	15	1	3
Trimenoponidae	79	1
Acanthobdellidae	80	1
Branchiobdellidae	80	9	30	2
Cambarincolidae	80	1
Erpobdellidae	80	32	5	5
Glossiphoniidae	80	18	4	2
Haemopidae	80	2	2
Hirudinidae	80	5	1
Piscicolidae	80	27
Xerobdellidae	80	3
Adelgidae	84	25
Aphididae	84	1373	15	248	2
Phylloxeridae	84	17	1
Barentsiidae	86	1	1
Acartophthalmidae	92	3
Acroceridae	92	34	5
Agromyzidae	92	906	528
Anthomyiidae	92	508	146
Anthomyzidae	92	28	14
Asilidae	92	524		60
Asteiidae	92	18	3
Atelestidae	92	4
Athericidae	92	10	1
Aulacigastridae	92	4	4
Bombyliidae	92	335	40	4	2
Borboropsidae	92	2	1
Braulidae	92	3	1
Calliphoridae	92	114	65	1
Camillidae	92	8	5
Campichoetidae	92	7
Canacidae	92	4
Carnidae	92	39		2
Chamaemyiidae	92	107	27
Chiropteromyzidae	92	2	1
Chloropidae	92	394	38
Chyromyidae	92	59
Clusiidae	92	14	8
Coelopidae	92	3	1
Coenomyiidae	92	1
Conopidae	92	84	4
Cryptochetidae	92	3
Curtonotidae	92	1	1
Diastatidae	92	9
Diopsidae	92	1
Dolichopodidae	92	773	387	32	12
Drosophilidae	92	121	112	2
Dryomyzidae	92	4	6
Empididae	92	816	20	2
Ephydridae	92	337	13	6
Fanniidae	92	83	4
Helcomyzidae	92	2
Heleomyzidae	92	150	7	3
Heterocheilidae	92	1
Hilarimorphidae	92	2
Hippoboscidae	92	30
Hybotidae	92	442	2
Lauxaniidae	92	157	3	5
Lonchaeidae	92	96	34
Lonchopteridae	92	13
Megamerinidae	92	1
Micropezidae	92	22
Microphoridae	92	17
Milichiidae	92	43	19	2	1
Muscidae	92	572	5	14
Mydidae	92	5
Mythicomyiidae	92	30
Nannodastiidae	92	3
Nemestrinidae	92	13
Nycteribiidae	92	15		2
Odiniidae	92	14	4
Oestridae	92	22
Opetiidae	92	1	1
Opomyzidae	92	33	13
Pallopteridae	92	23
Periscelididae	92	6	1
Phaeomyiidae	92	3	1
Phoridae	92	656	40	1
Piophilidae	92	29
Pipunculidae	92	200	8
Platypezidae	92	43	2
Platystomatidae	92	21	3	13	5
Pseudopomyzidae	92	1
Psilidae	92	47	3
Pyrgotidae	92	1
Rachiceridae	92	1
Rhagionidae	92	85	67
Rhinophoridae	92	45	1
Sarcophagidae	92	309	42
Scathophagidae	92	158	98	2	1
Scenopinidae	92	16	21
Sciomyzidae	92	136	30	8
Sepsidae	92	48
Sphaeroceridae	92	257	170	7
Stratiomyidae	92	141	33
Streblidae	92	1
Strongylophthalmyiidae	92	2
Syrphidae	92	829	3
Tabanidae	92	213	6	6
Tachinidae	92	877	7
Tanypezidae	92	1
Tephritidae	92	267	2	2
Tethinidae	92	34	22
Therevidae	92	99	59	3
Trixoscelididae	92	26	2
Ulidiidae	92	106	65	2	1
Vermileonidae	92	9
Xenasteiidae	92	1
Xylomyidae	92	8	1
Xylophagidae	92	5	1
Accipitridae	100	35		2
Aegithalidae	100	1
Alaudidae	100	18
Alcedinidae	100	1
Alcidae	100	12
Anatidae	100	65		2
Apodidae	100	8
Ardeidae	100	21
Bombycillidae	100	2
Burhinidae	100	1
Caprimulgidae	100	4
Cardinalidae	100	4
Certhiidae	100	2		1
Cerylidae	100	2
Charadriidae	100	19
Ciconiidae	100	3
Cinclidae	100	1
Cisticolidae	100	2
Coccyzidae	100	2
Columbidae	100	13		1
Coraciidae	100	1
Corvidae	100	15
Cuculidae	100	6
Dacelonidae	100	1
Dendrocygnidae	100	2
Diomedeidae	100	3
Emberizidae	100	30
Estrildidae	100	3
Falconidae	100	13
Fregatidae	100	1
Fringillidae	100	33		1
Gaviidae	100	4
Glareolidae	100	5
Gruidae	100	4
Haematopodidae	100	2
Hirundinidae	100	8
Hydrobatidae	100	6
Icteridae	100	5
Laniidae	100	9
Laridae	100	44
Meropidae	100	2
Mimidae	100	3
Motacillidae	100	17
Muscicapidae	100	7
Numididae	100	1
Odontophoridae	100	2
Oriolidae	100	1
Otididae	100	4
Pandionidae	100	1
Paridae	100	10		1
Parulidae	100	20
Passeridae	100	7
Pelecanidae	100	3
Phaethontidae	100	1
Phalacrocoracidae	100	4		2
Phasianidae	100	21		13
Phoenicopteridae	100	3
Picidae	100	11		2
Ploceidae	100	1
Podicipitidae	100	6
Procellariidae	100	14
Prunellidae	100	5
Psittacidae	100	2
Pteroclididae	100	5
Pycnonotidae	100	1
Rallidae	100	15
Recurvirostridae	100	2
Regulidae	100	5
Remizidae	100	1
Saxicolidae	100	33
Scolopacidae	100	56		1
Sittidae	100	6
Stercorariidae	100	5
Strigidae	100	15
Sturnidae	100	5
Sulidae	100	4
Sylviidae	100	62		1
Thraupidae	100	2
Threskiornithidae	100	5
Tichodromadidae	100	1
Troglodytidae	100	1		1
Turdidae	100	21
Turnicidae	100	1
Tyrannidae	100	2
Tytonidae	100	1
Upupidae	100	1
Vireonidae	100	2
Acanthodrilidae	101	2
Aeolosomatidae	101	24	3
Ailoscolecidae	101	1
Criodrilidae	101	2
Enchytraeidae	101	233	3
Eudrilidae	101	1
Glossoscolecidae	101	1
Hormogastridae	101	11
Lumbricidae	101	432	31
Megascolecidae	101	13	6
Nerillidae	101	1
Ocnerodrilidae	101	3
Octochaetidae	101	4
Parergodrilidae	101	2
Potamodrilidae	101	1
Propappidae	101	1
Serpulidae	101	1
Sparganophilidae	101	2
Chordodidae	107	41	5
Gordiidae	107	27	1
Dorydrilidae	116	3
Haplotaxidae	116	7
Lumbriculidae	116	67	6	9
Naididae	116	71	15	2
Parvidrilidae	116	1
Tubificidae	116	119	27	7	1
Argidae	118	64	12	8
Blasticotomidae	118	1
Braconidae	118	3499
Cephidae	118	43	5
Cimbicidae	118	54	11
Diprionidae	118	23	1
Ichneumonidae	118	5865	450
Megalodontesidae	118	22	12
Orussidae	118	7
Pamphiliidae	118	60	12	1
Siricidae	118	19	1	2
Tenthredinidae	118	1042	253	28
Xiphydriidae	118	7
Xyelidae	118	11	4
Agelenidae	119	147	25	1	1
Amaurobiidae	119	72	7	9	1
Anapidae	119	5
Anyphaenidae	119	5	1	1
Araneidae	119	107	16	41
Atypidae	119	3
Cithaeronidae	119	1
Clubionidae	119	59	12	3
Corinnidae	119	24	3
Ctenidae	119	2
Ctenizidae	119	8	1
Cybaeidae	119	12
Cyrtaucheniidae	119	4
Dictynidae	119	76	5	2
Dysderidae	119	309	24	6
Eresidae	119	16	4	4	4
Filistatidae	119	12	1
Gnaphosidae	119	434	70	16	2
Hahniidae	119	33		2
Hersilidae	119	4
Hexathelidae	119	2	1
Idiopidae	119	1
Leptonetidae	119	53	1	6
Linyphiidae	119	1307	76	36
Liocranidae	119	55	1	2
Lycosidae	119	264	19	36
Metidae	119	2
Mimetidae	119	10	1
Miturgidae	119	33	1
Mysmenidae	119	6
Nemesiidae	119	57	4	4
Nephilidae	119	1
Nesticidae	119	44		1
Ochyroceratidae	119	1
Oecobiidae	119	44	2
Oonopidae	119	30	4	2
Oxyopidae	119	10	1	1
Palpimanidae	119	6
Philodromidae	119	93	15	6	1
Pholcidae	119	90	4	1
Phyxelididae	119	1
Pimoidae	119	2
Pisauridae	119	12	2
Prodidomidae	119	11
Salticidae	119	384	36	11
Scytodidae	119	11	2
Segestriidae	119	13	2	1
Selenopidae	119	1
Sicariidae	119	3	1
Sparassidae	119	23	3	1
Synaphridae	119	7
Telemidae	119	1
Tetragnathidae	119	38	1	8
Theraphosidae	119	8	1
Theridiidae	119	244	53	7	1
Theridiosomatidae	119	1
Thomisidae	119	180	16	11
Titanoecidae	119	16	2
Trochanteriidae	119	1
Uloboridae	119	11
Zodariidae	119	88	3	2
Zoridae	119	12
Zoropsidae	119	7
Aeshnidae	121	20
Calopterygidae	121	4
Coenagrionidae	121	28
Cordulegastridae	121	7
Corduliidae	121	10
Euphaeidae	121	1
Gomphidae	121	12	1
Lestidae	121	9	1
Libellulidae	121	36
Macromiidae	121	1
Platycnemididae	121	3
Aeginidae	122	1	1
Blackfordiidae	122	1	1
Boreohydridae	122	1
Bougainvilliidae	122	4	1
Campanulariidae	122	6	2
Campanulinidae	122	2
Cladonematidae	122	1
Clavidae	122	4	2
Corymorphidae	122	2	1
Corynidae	122	2	1
Cyaneidae	122	1	1
Eirenidae	122	1	1
Eleutheriidae	122	1
Hydractiniidae	122	1
Hydridae	122	5	2
Lovenellidae	122	2	2
Margelopsidae	122	1
Microhydrulidae	122	1
Moerisiidae	122	3
Olindiasidae	122	3	1
Pandeidae	122	3	3
Polypodiidae	122	1
Protohydridae	122	1
Rathkeidae	122	1
Rhopalonematidae	122	1	1
Tubulariidae	122	3	1
Ulmariidae	122	1	1
Ceratophyllidae	131	100	21	68	16
Coptopsyllidae	131	3		2
Ctenophthalmidae	131	108	15	136	29
Hystrichopsyllidae	131	6		12	1
Ischnopsyllidae	131	22	8	5	2
Pulicidae	131	19	5	6	3
Vermipsyllidae	131	8	5
Capniidae	133	20
Chloroperlidae	133	19	1
Leuctridae	133	133	1
Nemouridae	133	132	5
Perlidae	133	18
Perlodidae	133	62	2
Taeniopterygidae	133	42	1
Amphientomidae	134	2
Amphipsocidae	134	2
Asiopsocidae	134	1
Caeciliusidae	134	16	1
Ectopsocidae	134	13
Elipsocidae	134	25	1
Epipsocidae	134	1
Lachesillidae	134	12	1
Lepidopsocidae	134	5
Liposcelididae	134	39	4
Mesopsocidae	134	21
Myopsocidae	134	1
Pachytroctidae	134	3
Peripsocidae	134	8	1
Philotarsidae	134	3
Prionoglarididae	134	2
Protroctopsocidae	134	3
Pseudocaeciliidae	134	2
Psocidae	134	36
Psoquillidae	134	3
Psyllipsocidae	134	5
Sphaeropsocidae	134	1
Stenopsocidae	134	4
Trichopsocidae	134	7	1
Trogiidae	134	19
Agamidae	135	4
Amphisbaenidae	135	2
Anguidae	135	3
Boidae	135	2
Bombinatoridae	135	6
Bufonidae	135	3
Chamaeleonidae	135	2
Cheloniidae	135	3
Colubridae	135	28
Dermochelyidae	135	1
Discoglossidae	135	4
Emydidae	135	1
Gekkonidae	135	9
Geoemydidae	135	2
Hylidae	135	4
Hynobiidae	135	1
Lacertidae	135	62
Pelobatidae	135	3
Pelodytidae	135	2
Pipidae	135	1
Plethodontidae	135	7
Proteidae	135	1
Ranidae	135	22
Salamandridae	135	23
Scincidae	135	13
Testudinidae	135	7
Typhlopidae	135	1
Viperidae	135	13
Adinetidae	144	13	1	5
Asplanchnidae	144	11	18
Atrochidae	144	4	2
Brachionidae	144	45	37	2	3
Collothecidae	144	41	30	1
Conochilidae	144	6	4
Dicranophoridae	144	186	22
Epiphanidae	144	15	10
Euchlanidae	144	21	9
Flosculariidae	144	36	35
Gastropodidae	144	9	5
Habrotrochidae	144	109	5	37	2
Hexarthridae	144	10	4
Ituridae	144	5	2
Lecanidae	144	107	58
Lepadellidae	144	80	51
Lindiidae	144	11	5
Microcodidae	144	1
Mytilinidae	144	15	5
Notommatidae	144	214	48	4
Philodinavidae	144	3
Philodinidae	144	176	14	42	12
Proalidae	144	40	5
Scaridiidae	144	2
Synchaetidae	144	41	17	2
Testudinellidae	144	15	1
Tetrasiphonidae	144	1
Trichocercidae	144	49	13
Trichotriidae	144	8	1
Trochosphaeridae	144	14	4
Aciculidae	287	55	24	10	9
Acroloxidae	287	4	1
Agriolimacidae	287	82	66	2
Argnidae	287	29	4	14	5
Arionidae	287	43	35
Assimineidae	287	10
Azecidae	287	14	9
Bithyniidae	287	36	11
Boettgerillidae	287	1	1
Bradybaenidae	287	1
Carychiidae	287	29	10	10	13
Charopidae	287	1
Chondrinidae	287	67	185	75	134
Clausiliidae	287	420	189	895	855
Cochlicellidae	287	26	26
Cochlicopidae	287	4	7
Cochlostomatidae	287	60	35	81	57
Cyclophoridae	287	10	6
Ellobiidae	287	8	19
Elonidae	287	2
Emmericiidae	287	4	8
Enidae	287	154	101	36	50
Euconulidae	287	4	3
Ferussaciidae	287	53	53	2
Gastrodontidae	287	8	2
Helicidae	287	229	245	266	244
Helicodiscidae	287	3	1
Helicodontidae	287	16	2	5	2
Hydrobiidae	287	615	185	107	26
Hydrocenidae	287	2	3
Hygromiidae	287	412	411	176	136
Lauriidae	287	41	25	7	2
Limacidae	287	60	54	2	5
Lymnaeidae	287	23	10	2
Melanopsidae	287	11	29	7	22
Milacidae	287	36	63
Moitessieriidae	287	65	18	6
Neritidae	287	16	12	9	27
Oleacinidae	287	5	1	3	5
Onchidiidae	287	2
Orculidae	287	44	13	31	6
Otinidae	287	1
Oxychilidae	287	138	125	20	34
Papillodermatidae	287	1
Parmacellidae	287	7	3
Patulidae	287	14	5	4	7
Physidae	287	4	10
Planorbidae	287	55	38	5	7
Pleurodiscidae	287	3	4
Pomatiidae	287	12	5	5	1
Pristilomatidae	287	92	39	8	2
Punctidae	287	3	10
Pupillidae	287	7	14
Pyramidulidae	287	6	4
Pyrgulidae	287	33	19	6	1
Sphincterochilidae	287	4		3	3
Streptaxidae	287	2
Strobilopsidae	287	17		3	2
Subulinidae	287	2	7
Succineidae	287	7	12	2	23
Testacellidae	287	6	16
Thiaridae	287	1
Trissexodontidae	287	26	7
Truncatellidae	287	1	4
Valloniidae	287	14	29
Valvatidae	287	14	7	2	2
Vertiginidae	287	38	77	4	3
Vitrinidae	287	58	58	2	4
Viviparidae	287	5	29	5	21
Zonitidae	287	61	24	20	9
Bovidae	312	11	1	14
Canidae	312	6		8
Castoridae	312	2
Cercopithecidae	312	1
Cervidae	312	11		6
Dipodidae	312	9
Equidae	312	2	1
Erinaceidae	312	4		9
Felidae	312	4		6
Herpestidae	312	2		1
Hystricidae	312	1
Leporidae	312	9		9
Macropodidae	312	1
Molossidae	312	1
Muridae	312	68	5	41
Mustelidae	312	14		13
Myocastoridae	312	1
Myoxidae	312	5		1
Ochotonidae	312	3		1
Odobenidae	312	1
Phocidae	312	8		4
Procyonidae	312	1
Pteropodidae	312	1
Rhinolophidae	312	5		2
Sciuridae	312	15		4
Soricidae	312	21		19
Suidae	312	1		3
Talpidae	312	8
Ursidae	312	2
Vespertilionidae	312	35	3	10
Viverridae	312	1		4
Corioxenidae	314	1
Elenchidae	314	1
Halictophagidae	314	9	1
Mengenillidae	314	3
Myrmecolacidae	314	1
Stylopidae	314	8
Xenidae	314	7	3
Corbiculidae	319	2	1
Dreissenidae	319	5
Margaritiferidae	319	2	3
Sphaeriidae	319	30	40	1
Unionidae	319	16	27	33	25
Bdellouridae	345	2
Bothrioplanidae	345	1
Carcharodopharyngidae	345	1
Catenulidae	345	10
Coelogynoporidae	345	3
Convolutidae	345	2
Dalyelliidae	345	88	7	22	2
Dendrocoelidae	345	95		3
Dugesiidae	345	20	1	4
Geoplanidae	345	42	1
Gnathorhynchidae	345	2
Graffillidae	345	2
Karkinorhynchidae	345	2	1
Koinocystididae	345	6	2
Macrostomidae	345	48	3	3	1
Mecynostomidae	345	2
Microstomidae	345	6
Monocelididae	345	11	6
Otomesostomidae	345	1
Otoplanidae	345	5
Placorhynchidae	345	2
Plagiostomidae	345	1
Planariidae	345	41	1	14	2
Polycystididae	345	8	1
Promesostomidae	345	18	1
Prorhynchidae	345	13	3	2
Protomonotresidae	345	2
Provorticidae	345	23	6
Scutariellidae	345	16
Stenostomidae	345	48		8
Temnocephalidae	345	1
Trigonostomidae	345	17	4
Typhloplanidae	345	198	12	15	1
Zonorhynchidae	345	1
Atemnidae	410	6		1
Bochicidae	410	1
Cheiridiidae	410	3
Cheliferidae	410	41		10
Chernetidae	410	50		7
Chthoniidae	410	226		20
Daesiidae	410	6	1	1
Eukoeneniidae	410	28		13
Galeodidae	410	6
Garypidae	410	3		2
Garypinidae	410	6
Geogarypidae	410	4
Gylippidae	410	2
Karschiidae	410	4
Larcidae	410	6
Neobisiidae	410	400	1	73
Olpiidae	410	18		2
Syarinidae	410	17		2
Withiidae	410	4
Anajapygidae	414	1
Campodeidae	414	194	9	48	1
Japygidae	414	81	5	13
Parajapygidae	414	1
Procampodeidae	414	1
Lineidae	470	1
Plectonemertidae	470	3
Tetrastemmatidae	470	8
Bittacidae	497	2	1
Boreidae	497	5	4
Panorpidae	497	16	10	18	3
Acalyptonotidae	499	1
Acaronychidae	499	2
Acarophenacidae	499	9
Acherontacaridae	499	7
Achipteriidae	499	48	1	3
Adamystidae	499	2
Adelphacaridae	499	1
Alicorhagiidae	499	5
Alloptidae	499	48	5
Alycidae	499	15	14
Ameridae	499	4
Amerobelbidae	499	11
Ameronothridae	499	12
Analgidae	499	56	12
Anisitsiellidae	499	19	1
Anystidae	499	21	2
Aphelacaridae	499	1
Apheviderulicidae	499	1
Apionacaridae	499	1
Arrenuridae	499	136	14	6
Ascouracaridae	499	1	1
Astegistidae	499	13
Athienemanniidae	499	8	1
Atopochthoniidae	499	1
Aturidae	499	88	3	10
Austrachipteriidae	499	1
Autognetidae	499	18		2
Avenzoariidae	499	42	6
Banksinomidae	499	17		5
Belbidae	499	67		3
Belbodamaeidae	499	7
Bembidiacaridae	499	1
Bogatiidae	499	1
Brachychthoniidae	499	97	1
Caeculidae	499	24		6
Caleremaeidae	499	2
Calyptostomatidae	499	1
Camerobiidae	499	21
Camisiidae	499	23
Caraboacaridae	499	2
Carabodidae	499	69		2
Cepheidae	499	38
Ceratozetidae	499	128	1	13
Chamobatidae	499	37		2
Chapuisididae	499	2
Collohmanniidae	499	1
Cosmochthoniidae	499	24
Ctenacaridae	499	7
Ctenobelbidae	499	19
Cymbaeremaeidae	499	12
Damaeidae	499	65		4
Damaeolidae	499	7
Dampfiellidae	499	1
Dermationidae	499	7		1
Dermoglyphidae	499	6
Diptilomiopidae	499	61	6
Dolichocybidae	499	7
Eniochthoniidae	499	2
Epidermoptidae	499	21	5	1
Epilohmanniidae	499	9		2
Eremaeidae	499	39		7
Eremellidae	499	2
Eremobelbidae	499	3
Eremulidae	499	4
Ereynetidae	499	43
Eriophyidae	499	892	97	2
Erythracaridae	499	14	13
Erythraeidae	499	184	13
Eulohmanniidae	499	2
Euphthiracaridae	499	17	1	8
Eupodidae	499	20	2
Eustathiidae	499	7	3
Euzetidae	499	5
Eylaidae	499	33		4	1
Falculiferidae	499	2	1
Feltriidae	499	32	1	3
Freyanidae	499	19	3
Frontipodopsidae	499	1
Gabuciniidae	499	7		1
Galumnellidae	499	2
Galumnidae	499	83		7
Gaudoglyphidae	499	1
Gehypochthoniidae	499	2
Gustaviidae	499	8
Gymnodamaeidae	499	29		3
Halacaridae	499	24		12
Haplochthoniidae	499	6
Haplozetidae	499	20		2
Hermanniellidae	499	10		2
Hermanniidae	499	16
Humerobatidae	499	6		2
Hungarohydracaridae	499	2	3
Hydrachnidae	499	38		14
Hydrodromidae	499	4
Hydrovolziidae	499	5
Hydrozetidae	499	8
Hydryphantidae	499	121	12	22
Hygrobatidae	499	109	37
Hypochthoniidae	499	5
Iolinidae	499	55
Johnstonianidae	499	27	2	2
Kodiakellidae	499	1
Kramerellidae	499	19	1
Krendowskiidae	499	1
Lamellareidae	499	1
Lebertiidae	499	130	3	11
Leeuwenhoekiidae	499	5
Liacaridae	499	73
Licneremaeidae	499	8
Licnobelbidae	499	4
Licnodamaeidae	499	4
Limnesiidae	499	23	1	2
Limnocharidae	499	2
Limnozetidae	499	6		2
Liodidae	499	8
Lohmanniidae	499	22
Lordalychidae	499	2
Machuellidae	499	6
Malaconothridae	499	28
Mesoplophoridae	499	4
Metrioppiidae	499	9
Meyerellidae	499	15
Micreremidae	499	2		2
Micropsammidae	499	1
Microtrombidiidae	499	108	5
Microzetidae	499	27
Mideidae	499	1
Mideopsidae	499	9
Mochlozetidae	499	3
Momoniidae	499	5	1
Mycobatidae	499	57		2
Nanhermanniidae	499	13
Nanorchestidae	499	15
Nematalycidae	499	2
Neoacaridae	499	1
Neothrombiidae	499	6
Neotrombidiidae	499	2
Niphocepheidae	499	2		3
Nothridae	499	15		2
Opilioacaridae	499	1
Oppiidae	499	269	6	51	1
Oribatellidae	499	60	1	2
Oribatulidae	499	130	2	10
Oribotritiidae	499	20	2	2
Oripodidae	499	4
Otocepheidae	499	5
Oxidae	499	16
Palaeacaridae	499	5	1
Parakalummidae	499	6
Parhypochthoniidae	499	6
Passalozetidae	499	29
Penthaleidae	499	9	3
Penthalodidae	499	4
Perlohmanniidae	499	4
Phenopelopidae	499	55	1	3
Pheroliodidae	499	4
Phthiracaridae	499	77	10	2
Phytoptidae	499	56	2
Piersigiidae	499	3
Pionidae	499	68	1	9
Plateremaeidae	499	2
Podapolipidae	499	40	4
Podothrombiidae	499	41
Polypterozetidae	499	1
Proctophyllodidae	499	65	23	1
Protoplophoridae	499	11
Protoribatidae	499	31		2
Psoroptoididae	499	7	2
Pterochthoniidae	499	1
Pterolichidae	499	38	4
Pteronyssidae	499	19	15
Ptiloxenidae	499	6
Pyemotidae	499	15	1
Quadroppiidae	499	16		3
Rhagidiidae	499	88	9
Rutripalpidae	499	1
Scheloribatidae	499	47		2
Scutoverticidae	499	33
Selenoribatidae	499	3
Siteroptidae	499	79	6
Smarididae	499	12	2
Sperchontidae	499	29	3	2
Sphaerochthoniidae	499	4
Sphaerolichidae	499	2
Spinozetidae	499	1
Steganacaridae	499	72	6	8
Stygothrombiidae	499	8
Suctobelbidae	499	79		6
Syringobiidae	499	30	5
Tanaupodidae	499	14
Tarsocheylidae	499	3	1
Tarsonemidae	499	227	22	4
Tectocepheidae	499	14		2
Tegoribatidae	499	8
Teneriffiidae	499	2	1
Tenuialidae	499	5
Tenuipalpidae	499	72	23
Terpnacaridae	499	4
Tetranychidae	499	152	127
Teutoniidae	499	2
Thyrisomidae	499	9
Thysanocercidae	499	1	1
Torrenticolidae	499	65	10	7
Trhypochthoniidae	499	16
Trombellidae	499	11
Trombiculidae	499	99	2
Trombidiidae	499	90	1
Trouessartiidae	499	21	1
Tydeidae	499	195	1
Unduloribatidae	499	1
Unionicolidae	499	31
Wettinidae	499	1
Xenillidae	499	25		3
Xolalgidae	499	29	4
Xylobatidae	499	1
Zetomimidae	499	3
Zetomotrichidae	499	7		2
Zetorchestidae	499	17		2
Achromadoridae	511	10	2
Actinolaimidae	511	7
Aetholaimidae	511	1
Alaimidae	511	48
Alloionematidae	511	4
Anatonchidae	511	30	1
Andrassyidae	511	3
Anguinidae	511	68	3
Aphelenchidae	511	3
Aphelenchoididae	511	59	1
Aporcelaimidae	511	55	7
Atylenchidae	511	3	1
Aulolaimidae	511	8
Aulolaimoididae	511	3
Bastianiidae	511	5
Bathyodontidae	511	2
Belondiridae	511	45
Brevibuccidae	511	9
Bunonematidae	511	27
Campydoridae	511	2
Cephalobidae	511	106	3
Chambersiellidae	511	5
Choanolaimidae	511	1
Chromadoridae	511	11
Chronogastridae	511	9
Criconematidae	511	82	6
Cyatholaimidae	511	2
Cylindrocorporidae	511	4
Desmodoridae	511	8
Desmoscolecidae	511	9
Diphtherophoridae	511	20	1
Diplogasteroididae	511	21
Diplogastridae	511	41
Diplopeltidae	511	11
Diploscapteridae	511	4
Discolaimidae	511	24	1
Dolichodoridae	511	2
Dorylaimidae	511	118	2
Ecphyadophoridae	511	3
Elaphonematidae	511	1
Ethmolaimidae	511	2	4
Halaphanolaimidae	511	9
Hemicycliophoridae	511	18
Heteroderidae	511	45	5
Hoplolaimidae	511	81	5
Hypodontolaimidae	511	6
Ironidae	511	10	1
Isolaimidae	511	3
Leptolaimidae	511	8
Leptonchidae	511	35	2
Linhomoeidae	511	1
Longidoridae	511	79
Meloidogynidae	511	19	4
Metateratocephalidae	511	5
Microlaimidae	511	4
Monhysteridae	511	58	2
Mononchidae	511	43	3
Mydonomidae	511	25	1
Mylonchulidae	511	33	1
Myolaimidae	511	5
Neodiplogastridae	511	83
Neotylenchidae	511	16
Nordiidae	511	62	1
Nygolaimidae	511	40
Odontolaimidae	511	2
Odontopharyngidae	511	1
Onchulidae	511	3
Ostellidae	511	5
Panagrolaimidae	511	55	2
Paraphelenchidae	511	5
Paratylenchidae	511	36	1
Plectidae	511	66	4
Pratylenchidae	511	56
Prismatolaimidae	511	12	1
Pseudodiplogastridae	511	2
Psilenchidae	511	9
Pterygorhabditidae	511	1
Qudsianematidae	511	169	5
Rhabditidae	511	147	4
Rhabditonematidae	511	1
Rhabdolaimidae	511	6
Rotylenchulidae	511	5
Seinuridae	511	17
Sphaerolaimidae	511	4
Sphaeronematidae	511	3
Sychnotylenchidae	511	3
Telotylenchidae	511	97	5
Teratocephalidae	511	7
Thoracostomopsidae	511	1
Tobrilidae	511	42	1
Trichodoridae	511	31	5
Tripylidae	511	21	1
Tylenchidae	511	117	13
Tylencholaimidae	511	38	1
Tylenchulidae	511	3
Tylodoridae	511	6	1
Tylopharyngidae	511	1
Xiphinematidae	511	66	3	2
Xyalidae	511	16
Acerentomidae	653	95	19	2	4
Eosentomidae	653	60	5
Hesperentomidae	653	8	1
Protentomidae	653	14	2
Adiheterothripidae	654	1
Aeolothripidae	654	65	52
Fauriellidae	654	1
Merothripidae	654	1	1
Phlaeothripidae	654	216	152	3
Thripidae	654	287	324
Anisopodidae	660	10	1
Axymyiidae	660	1
Bibionidae	660	50	62
Blephariceridae	660	37	11	5	8
Bolitophilidae	660	36	11
Canthyloscelidae	660	3	2
Cecidomyiidae	660	1639	171
Ceratopogonidae	660	567	623
Chaoboridae	660	9	14
Chironomidae	660	1262	1085	11	10
Culicidae	660	104		1
Cylindrotomidae	660	6	3	4	2
Diadocidiidae	660	7	2
Ditomyiidae	660	4	7
Dixidae	660	32	23
Hesperinidae	660	1
Keroplatidae	660	109	70	3
Limoniidae	660	545	254	42	35
Mycetobiidae	660	4	1
Mycetophilidae	660	942	480
Pachyneuridae	660	1	1
Pediciidae	660	63	23	4	2
Psychodidae	660	493	58	19	6
Ptychopteridae	660	14	1
Scatopsidae	660	102	35
Sciaridae	660	672	427
Simuliidae	660	231
Thaumaleidae	660	76	1
Tipulidae	660	456	143	88	59
Trichoceridae	660	50	8
Acipenseridae	661	10
Adrianichthyidae	661	1
Anguillidae	661	1
Atherinidae	661	1
Atherinopsidae	661	1
Balitoridae	661	6
Blenniidae	661	2
Centrarchidae	661	3
Cichlidae	661	5
Clupeidae	661	16
Cobitidae	661	31
Cottidae	661	8
Cyprinidae	661	204
Cyprinodontidae	661	3
Esocidae	661	1
Fundulidae	661	1
Gasterosteidae	661	9
Gobiidae	661	37
Ictaluridae	661	3
Lotidae	661	1
Moronidae	661	1
Mugilidae	661	6
Odontobutidae	661	1
Osmeridae	661	3
Percidae	661	14
Petromyzontidae	661	12
Pleuronectidae	661	3
Poeciliidae	661	2
Salmonidae	661	114
Siluridae	661	2
Syngnathidae	661	1
Umbridae	661	2
Valenciidae	661	2
Agaonidae	662	5	4
Ampulicidae	662	5	3
Aphelinidae	662	193	144
Apidae	662	2066	164
Aulacidae	662	11	13
Bethylidae	662	226	23
Bradynobaenidae	662	5	13
Ceraphronidae	662	102	2
Chalcididae	662	93	118
Chrysididae	662	483	50	280	7
Crabronidae	662	664	5	152
Cynipidae	662	339	358	2
Diapriidae	662	781	24
Dryinidae	662	107	224	2
Embolemidae	662	4	6
Encyrtidae	662	769	456
Eucharitidae	662	15
Eulophidae	662	1193	805
Eupelmidae	662	105	95
Eurytomidae	662	352	162
Evaniidae	662	5	12
Figitidae	662	425	207	2
Formicidae	662	637	8	197
Gasteruptiidae	662	30	57
Heloridae	662	4
Heterogynaidae	662	1
Ibaliidae	662	3		2	7
Leucospidae	662	8	36
Megaspilidae	662	140	1
Mutillidae	662	154	140	34
Mymaridae	662	457	152
Mymarommatidae	662	1
Ormyridae	662	25	26
Perilampidae	662	67	26
Platygastridae	662	518	21
Pompilidae	662	284	436	30	30
Proctotrupidae	662	59	53
Pteromalidae	662	1389	1026
Sapygidae	662	10	25
Scelionidae	662	587	51
Sclerogibbidae	662	5
Scoliidae	662	22	19	18	20
Signiphoridae	662	10	3
Sphecidae	662	58	2	14
Stephanidae	662	2	3
Tetracampidae	662	11	5
Tiphiidae	662	37	28	5	13
Torymidae	662	326	238
Trichogrammatidae	662	147	63
Trigonalidae	662	1	9
Vanhorniidae	662	1
Vespidae	662	269	220	88	63
Cristatellidae	670	1
Fredericellidae	670	4
Lophopodidae	670	2
Paludicellidae	670	1	1
Pectinatellidae	670	1
Plumatellidae	670	13	3
Victorellidae	670	3	1
Ascalaphidae	681	18	1	3
Berothidae	681	2
Chrysopidae	681	73	4	3
Coniopterygidae	681	59	2
Dilaridae	681	10
Hemerobiidae	681	61	1
Inocelliidae	681	7
Mantispidae	681	5	1
Myrmeleontidae	681	58	1	3
Nemopteridae	681	7
Nevrorthidae	681	3
Osmylidae	681	3
Raphidiidae	681	74	1	12
Sialidae	681	10
Sisyridae	681	7	1
		132100	40354	14188	5564

## Sheet: Species numbers per group
Shortname taxon group	Taxon group	Group Coordinator (GC_Id)	Group Coordinator (name) version 1	Group Coordinator (name) version 2	Species numbers (version 2.6.2)	No. of species	No. of families	No. of experts	Known gaps
Acari: Acariformes	Acari: Acariformes	499	Wojciech Magowski	Wojciech Magowski	6642	6642	299	14	505 species
Acari: Ixodida	Acari: Ixodida	33	Jean-Louis Camicas	Jean-Louis Camicas	77	77	3	22
Acari: Mesostigmata	Acari: Mesostigmata	69	Lars Lundqvist	Lundqvist, Lars	1479	1479	51	1
Amblypygi & Uropygi	Megoperculata (Amblypygi & Uropygi)	42	Henrik Enghoff	Henrik Enghoff	2	2	2	1
Amphibians & Reptiles	Amphibians & Reptiles	135	Alain Dubois	Alain Dubois	230	230	30	6
Annelida: Hirudinea	Annelida: Hirudinea, Branchiobdellae & Acanthobdellae	80	Alessandro Minelli	Alessandro Minelli	98	98	9	2
Annelida: Oligochaeta (limnic)	Oligochaeta (limnic excl. enchytraeids)	116	Tarmo Timm	Tarmo Timm	268	268	8	1
Annelida: Oligochaeta (terrestrial)	Oligochaeta (terrestrial & all Enchytraeidae), Aphanoneura & Polychaeta	101	Emilia Rota	Emilia Rota	735	735	18	1
Apterygote Insecta	Apterygote insecta	78	Luis F. Mendes	Luis F. Mendes	273	273	4	2
Araneae	Araneae	119	Peter van Helsdingen	Peter van Helsdingen	4517	4517	63	6
Aves	Aves	100	Cees Roselaar	Cees Roselaar	809	809	87	1
Bryozoa (Ectoprocta)	Bryozoa (Ectoprocta)	670	Jos & Gaby Massard-Geimer	Emmy Woss	25	25	7	1
Cnidaria: Hydroida	Cnidaria	122	Wim Vervoort	Wim Vervoort	54	54	27	1
Coleoptera 1	Coleoptera 1: Polyphaga (Staphyliniformia, Scarabaeiformia, Elateriformia, Curculionoidea)	13	Miguel A. Alonso-Zarazaga	Miguel A. Alonso-Zarazaga	15552	15552	57	65	500 species
Coleoptera 2	Coleoptera 2: Archostemata, Myxophaga, Adephaga, Polyphaga (Bostrichiformia, Lymexyloidea, Cleroidea, Cucujoidea, Tenebrionoidea & Chrysomeloidea)	18	Paolo Audisio	Paolo Audisio	12425	12425	80	45
Collembola	Collembola	41	Louis Deharveng	Louis Deharveng	1941	1941	23	10
Crustacea	Crustacea	30	Geoffrey Boxshall	Geoffrey Boxshall	3493	3493	127	9
Diplura	Diplura	414	Jean-Marc Thibaud	Jean-Marc Thibaud	278	278	5	4
Diptera: Brachycera	Diptera: Brachycera	92	Thomas Pape	Thomas Pape & Paul Beuk	11751	11751	96	55
Diptera: Nematocera	Diptera: Nematocera	660	Herman de Jong	Paul Beuk & Thomas Pape	7526	7526	30	14	700 species
Entoprocta	Entoprocta	86	Claus Nielsen	Claus Nielsen	1	1	1	1
Ephemeroptera	Ephemeroptera	26	Carlo Belfiore& Alain Thomas	Carlo Belfiore& Alain Thomas	339	339	18	14
Gastrotricha	Gastrotricha	21	Maria Balsamo	Maria Balsamo	214	214	5	5
Helminths (Animal parasitics)	Animal Parasitic Helminths (Platyhelminthes, Acanthocephala, Nematoda)	51	David Gibson	David Gibson	3986	3986	214	19
Hemiptera: Aphidoidea	Hemiptera: Sternorrhyncha: Aphidoidea & Phylloxeroidea	84	Juan M. Nieto Nafría	Juan M. Nieto Nafría	1415	1415	3	7
Hemiptera: Cicadomorpha etc.	Hemiptera: Cicadomorpha, Fulgoromorpha	56	Hannelore Hoch	Hannelore Hoch	2053	2053	23	3
Hemiptera: Coccoidea etc.	Hemiptera: Sternorrhyncha: Psylloidea, Aleyrodoidea, Coccoidea	32	Daniel Burckhardt	Daniel Burckhardt	1289	1289	20	1
Hemiptera: Heteroptera	Hemiptera: Heteroptera	19	Berend Aukema	Berend Aukema	2709	2709	48	1
Hymenoptera: Apocrita (excl. Ichneumonoidea)	Hymenoptera: Apocrita (excl. Ichneumonoidea)	662	John Noyes	Mircea-Dan Mitroiu	13211	13211	52	19
Hymenoptera: Symphyta + Ichneumo	Hymenoptera: Symphyta, Ichneumonoidea	118	Kees van Achterberg	Kees van Achterberg	10717	10717	14	7
Lepidoptera: Moths + Butterflies	Ole Karsholt & Erik van Nieukerken + Willy De Prins	63	Ole Karsholt & Erik van Nieukerken	Ole Karsholt & Erik van Nieukerken	9865	9865	86	60
Mammalia	Mammalia	312	Wieslaw Bogdanowicz	Wieslaw Bogdanowicz	254	254	31	2
Mecoptera	Mecoptera	497	Rainer Willmann	Rainer Willmann	23	23	3	1
Mollusca: Bivalvia	Mollusca: Bivalvia	319	Rafael Araujo	Rafael Araujo	55	55	5	1
Mollusca: Gastropoda	Mollusca: Gastropoda	287	Ruud A. Bank	Ruud A. Bank	3337	3337	70	1
Myriapoda	Myriapoda	42	Henrik Enghoff	Henrik Enghoff	2225	2225	73	9
Nematoda	Nematoda (excl. animal parasites)	511	Tom Bongers	Vlada Peneva	2618	2618	96	36
Nematomorpha	Nematomorpha	107	Andreas Schmidt-Rhaesa	Andreas Schmidt-Rhaesa	68	68	2	1
Nemertea	Nemertea	470	Ray Gibson	Ray Gibson	12	12	3	1
Neuropteroid orders	Neuropteroid orders (Megaloptera-Raphidioptera-Neuroptera)	681	Horst & Ulrike Aspöck	Horst & Ulrike Aspöck & Agostine Letardi	397	397	15	3
Odonata	Odonata	121	Jan van Tol	Jan van Tol	131	131	11	8
Opiliones	Opiliones	75	Jochen Martens	Jochen Martens	330	330	11	1
Orthopteroid orders	Orthopteroid orders (Orthoptera, Embioptera, Dictyoptera, Phasmatodea, Dermaptera)	55	Klaus-Gerhard Heller	Klaus-Gerhard Heller	1371	1371	35	4
Palpigradi, PsScorp & Solifugae	Pseudoscorpiones, Solifugae, Palpigradi	410	Mark S. Harvey	Mark S. Harvey	831	831	19	1
Phthiraptera	Phthiraptera	79	Eberhard Mey	Eberhard Mey	719	719	19	1
Pisces	Pisces	661	Nicolas Bailly	Jorg Freyhof	507	507	23	3	350 species
Platyhelminthes: Turbellaria	Platyhelminthes: Turbellaria	345	Anno Faubel	Carolina Noreña Janssen	738	738	34	2
Plecoptera	Plecoptera	133	Romolo Fochetti	Romolo Fochetti	426	426	7	2
Porifera: Spongillidae	Porifera	74	Renata Manconi	Ole Tendal	18	18	3	1
Protura	Protura	653	Andrzej Szeptycki	Julia Shrubovych	177	177	4	1
Psocoptera	Psocoptera	134	Verner Michelsen (FaEu Copenhagen office)	Verner Michelsen	234	234	25	3
Rotifera	Rotifera: Monogononta & Bdelloidea	144	Hendrik Segers	Hendrik Segers	1288	1288	30	7
Scorpiones	Scorpiones	36	Pierangelo Crucitti	Pierangelo Crucitti	23	23	4	2
Siphonaptera	Siphonaptera	131	Maria Soledad Gomez Lopez	Maria Soledad Gomez Lopez	266	266	7	1
Strepsiptera	Strepsiptera	314	Hans Pohl	Hans Pohl	30	30	7	1
Tardigrada	Tardigrada	77	Sandra J. McInnes	Sandra J. McInnes	428	428	14	5
Thysanoptera	Thysanoptera	654	Richard zur Strassen	Bert Vierbergent	571	571	6	2
Trichopetra	Trichoptera	73	Peter Barnard	Hans Malicky	1049	1049	24	1
