# Supplementary material for: Fauna Europaea – all European animal species on the web
Source: Biodivers Data J. 2014 Sep 17;(2):e4034. doi: 10.3897/BDJ.2.e4034 (PMC4206781; doi:10.3897/BDJ.2.e4034)
Supplement: Supplementary material 6 — Fauna Europaea homonyms [file biodiversity_data_journal-2-e4034-s006.xls]

## Sheet: Species names
Accepted species name homonyms
	Accepted Name
Family / Parent	Genus name	Specific epithet	Author	Year	Id		Expert GC	Expert TS
Pteromalidae	Pteromalus	aeneus	Fonscolombe	1832	75052	http://www.faunaeur.org/full_results.php?id=75052	Noyes,John	Noyes,John
	Pteromalus	aeneus	Nees	1834	75053	http://www.faunaeur.org/full_results.php?id=75053	Noyes,John	Noyes,John
Mymaridae	Anaphes	angustipennis	Debauche	1948	73667	http://www.faunaeur.org/full_results.php?id=73667	Noyes,John	Noyes,John
	Anaphes	angustipennis	Soyka	1949	73669	http://www.faunaeur.org/full_results.php?id=73669	Noyes,John	Noyes,John
Torymidae	Torymus	basalis	Fonscolombe	1840	77579	http://www.faunaeur.org/full_results.php?id=77579	Noyes,John	Noyes,John
	Torymus	basalis	Walker	1833	77577	http://www.faunaeur.org/full_results.php?id=77577	Noyes,John	Noyes,John
Hydrophilidae	Sphaeridium	bipustulatum	Fabricius	1781	189205	http://www.faunaeur.org/full_results.php?id=189205	Alonso-Zarazaga,Miguel A.	Ribera,Ignacio
	Sphaeridium	bipustulatum	Thunberg	1794	189221	http://www.faunaeur.org/full_results.php?id=189221	Alonso-Zarazaga,Miguel A.	Ribera,Ignacio
Figitidae	Trybliographa	brevicornis	Ionescu	1969	79938	http://www.faunaeur.org/full_results.php?id=79938	Noyes,John	Ronquist, Fredrik,Forshage, Mattias
	Trybliographa	brevicornis	Kieffer	1901	79937	http://www.faunaeur.org/full_results.php?id=79937	Noyes,John	Ronquist, Fredrik,Forshage, Mattias
Eulophidae	Tetrastichus	breviscapus	Kostjukov	1977	70211	http://www.faunaeur.org/full_results.php?id=70211	Noyes,John	Noyes,John
	Tetrastichus	breviscapus	Kostjukov	1978	70212	http://www.faunaeur.org/full_results.php?id=70212	Noyes,John	Noyes,John
Dictyocaulidae	Dictyocaulus	capreolus	Gibbons & Hoglund	2003	229002	http://www.faunaeur.org/full_results.php?id=229002	Gibson,David	Gibson,David
	Dictyocaulus	capreolus	Gibbons & Höglund	2002	228998	http://www.faunaeur.org/full_results.php?id=228998	Gibson,David	Gibson,David
Pteromalidae	Pachyneuron	coccorum	Linnaeus	1758	75687	http://www.faunaeur.org/full_results.php?id=75687	Noyes,John	Noyes,John
	Pachyneuron	coccorum	Ratzeburg	1848	75688	http://www.faunaeur.org/full_results.php?id=75688	Noyes,John	Noyes,John
Mymaridae	Anaphes	crassicornis	Soyka	1949	73702	http://www.faunaeur.org/full_results.php?id=73702	Noyes,John	Noyes,John
	Anaphes	crassicornis	Walker	1846	73701	http://www.faunaeur.org/full_results.php?id=73701	Noyes,John	Noyes,John
Diapriidae	Aclista	crassinervis	Kieffer	1909	156888	http://www.faunaeur.org/full_results.php?id=156888	Noyes,John	Johnson,Norman
	Aclista	crassinervis	Kieffer	1910	156889	http://www.faunaeur.org/full_results.php?id=156889	Noyes,John	Johnson,Norman
Formicidae	Monomorium	creticum	Emery	1895	80846	http://www.faunaeur.org/full_results.php?id=80846	Noyes,John	Radchenko,Alexander
	Monomorium	creticum	Emery	1908	80847	http://www.faunaeur.org/full_results.php?id=80847	Noyes,John	Radchenko,Alexander
Pteromalidae	Pteromalus	decipiens	Förster	1841	75166	http://www.faunaeur.org/full_results.php?id=75166	Noyes,John	Noyes,John
	Pteromalus	decipiens	Graham	1969	75167	http://www.faunaeur.org/full_results.php?id=75167	Noyes,John	Noyes,John
Tenebrionidae	Agnathus	decoratus	Germar	1818	282395	http://www.faunaeur.org/full_results.php?id=282395	Audisio, Prof. Paolo	Fattorini, Dr. Simone
Pyrochroidae	Agnathus	decoratus	Germar	1825	124638	http://www.faunaeur.org/full_results.php?id=124638	Audisio, Prof. Paolo	Nardi, Mr Gianluca
Oribatulidae	Oribatula	dentata	Grobler & Skubala	1999	176753	http://www.faunaeur.org/full_results.php?id=176753	Magowski,Wojciech	Niedbala,Wojciech
	Oribatula	dentata	Mihelcic	1968	176754	http://www.faunaeur.org/full_results.php?id=176754	Magowski,Wojciech	Niedbala,Wojciech
Encyrtidae	Encyrtus	dubius	Fonscolombe	1840	69193	http://www.faunaeur.org/full_results.php?id=69193	Noyes,John	Noyes,John
	Encyrtus	dubius	Mercet	1921	69195	http://www.faunaeur.org/full_results.php?id=69195	Noyes,John	Noyes,John
Eulophidae	Microlycus	erdoesi	Boucek	1958	71287	http://www.faunaeur.org/full_results.php?id=71287	Noyes,John	Noyes,John
	Microlycus	erdoesi	Szelényi	1976	71289	http://www.faunaeur.org/full_results.php?id=71289	Noyes,John	Noyes,John
Tettigometridae	Tettigometra	fasciata	Fieber	1865	152166	http://www.faunaeur.org/full_results.php?id=152166	Hoch,Hannelore	Hoch,Hannelore
	Tettigometra	fasciata	Rambur	1840	152165	http://www.faunaeur.org/full_results.php?id=152165	Hoch,Hannelore	Hoch,Hannelore
Diapriidae	Aclista	flavicornis	Kieffer - homonymA	1909	156902	http://www.faunaeur.org/full_results.php?id=156902	Noyes,John	Johnson,Norman
	Aclista	flavicornis	Kieffer - homonymB	1909	156904	http://www.faunaeur.org/full_results.php?id=156904	Noyes,John	Johnson,Norman
Tydeidae	Lorryia	formosa	Cooreman	1958	96064	http://www.faunaeur.org/full_results.php?id=96064	Magowski,Wojciech	André,Henri M.
	Lorryia	formosa	Livshitz	1972	96065	http://www.faunaeur.org/full_results.php?id=96065	Magowski,Wojciech	André,Henri M.
Diapriidae	Aclista	fuscicornis	Kieffer	1909	156912	http://www.faunaeur.org/full_results.php?id=156912	Noyes,John	Johnson,Norman
	Aclista	fuscicornis	Kieffer	1910	156913	http://www.faunaeur.org/full_results.php?id=156913	Noyes,John	Johnson,Norman
Chamaemyiidae	Chamaemyia	geniculata	Haliday	1838	60470	http://www.faunaeur.org/full_results.php?id=60470	Pape,Thomas	Gaimari,Stephen D.
	Chamaemyia	geniculata	Zetterstedt	1838	60471	http://www.faunaeur.org/full_results.php?id=60471	Pape,Thomas	Gaimari,Stephen D.
Figitidae	Kleidotoma	gracilicornis	Cameron	1889	80153	http://www.faunaeur.org/full_results.php?id=80153	Noyes,John	Ronquist, Fredrik,Forshage, Mattias
	Kleidotoma	gracilicornis	Ionescu	1969	80154	http://www.faunaeur.org/full_results.php?id=80154	Noyes,John	Ronquist, Fredrik,Forshage, Mattias
Diapriidae	Aclista	hungarica	Kieffer	1909	156919	http://www.faunaeur.org/full_results.php?id=156919	Noyes,John	Johnson,Norman
	Aclista	hungarica	Kieffer	1910	156920	http://www.faunaeur.org/full_results.php?id=156920	Noyes,John	Johnson,Norman
Gnaphosidae	Zelotes	insulanus	De Dalmas	1922	179974	http://www.faunaeur.org/full_results.php?id=179974	van Helsdingen,Peter	van Helsdingen,Peter
	Zelotes	insulanus	L. Koch	1867	179973	http://www.faunaeur.org/full_results.php?id=179973	van Helsdingen,Peter	van Helsdingen,Peter
Brachionidae	Notholca	labis	Gosse	1887	301862	http://www.faunaeur.org/full_results.php?id=301862	Segers,Hendrik	Braioni,Maria Giovanna
	Notholca	labis	Levander	1901	301863	http://www.faunaeur.org/full_results.php?id=301863	Segers,Hendrik	Braioni,Maria Giovanna
Staphylinidae	Staphylinus	latus	O. Müller	1776	260710	http://www.faunaeur.org/full_results.php?id=260710	Alonso-Zarazaga,Miguel A.	Alonso-Zarazaga,Miguel A.
	Staphylinus	latus	Ström	1768	260711	http://www.faunaeur.org/full_results.php?id=260711	Alonso-Zarazaga,Miguel A.	Alonso-Zarazaga,Miguel A.
Encyrtidae	Isodromus	limosus	Hoffer	1969	69045	http://www.faunaeur.org/full_results.php?id=69045	Noyes,John	Noyes,John
	Isodromus	limosus	Hoffer	1976	69046	http://www.faunaeur.org/full_results.php?id=69046	Noyes,John	Noyes,John
Figitidae	Trybliographa	longicornis	Hartig	1840	79974	http://www.faunaeur.org/full_results.php?id=79974	Noyes,John	Ronquist, Fredrik,Forshage, Mattias
	Trybliographa	longicornis	Ionescu	1969	79973	http://www.faunaeur.org/full_results.php?id=79973	Noyes,John	Ronquist, Fredrik,Forshage, Mattias
Figitidae	Kleidotoma	longicornis	Cameron	1889	80168	http://www.faunaeur.org/full_results.php?id=80168	Noyes,John	Ronquist, Fredrik,Forshage, Mattias
	Kleidotoma	longicornis	Kieffer	1904	80167	http://www.faunaeur.org/full_results.php?id=80167	Noyes,John	Ronquist, Fredrik,Forshage, Mattias
Mymaridae	Anaphes	longicornis	Soyka	1949	73769	http://www.faunaeur.org/full_results.php?id=73769	Noyes,John	Noyes,John
	Anaphes	longicornis	Walker	1846	73768	http://www.faunaeur.org/full_results.php?id=73768	Noyes,John	Noyes,John
Figitidae	Alloxysta	luteipes	Ionescu	1969	80425	http://www.faunaeur.org/full_results.php?id=80425	Noyes,John	Ronquist, Fredrik,Forshage, Mattias
	Alloxysta	luteipes	Kieffer	1902	80426	http://www.faunaeur.org/full_results.php?id=80426	Noyes,John	Ronquist, Fredrik,Forshage, Mattias
Apidae	Ammobates	major	Dusmet y Alonso	1921	231235	http://www.faunaeur.org/full_results.php?id=231235	Noyes,John	Polaszek,Andrew
	Ammobates	major	Perez	1902	231236	http://www.faunaeur.org/full_results.php?id=231236	Noyes,John	Polaszek,Andrew
Ascidae	Lasioseius	muricatus	Berlese	1887	244025	http://www.faunaeur.org/full_results.php?id=244025	Lundqvist,Lars	Lundqvist,Lars
	Lasioseius	muricatus	C.L. Koch	1839	244024	http://www.faunaeur.org/full_results.php?id=244024	Lundqvist,Lars	Lundqvist,Lars
Figitidae	Kleidotoma	nigra	Dettmer	1926	80175	http://www.faunaeur.org/full_results.php?id=80175	Noyes,John	Ronquist, Fredrik,Forshage, Mattias
	Kleidotoma	nigra	Hartig	1840	80176	http://www.faunaeur.org/full_results.php?id=80176	Noyes,John	Ronquist, Fredrik,Forshage, Mattias
Elateridae	Dicronychus	obesus	Brullé	1832	235968	http://www.faunaeur.org/full_results.php?id=235968	Alonso-Zarazaga,Miguel A.	Cate,Peter C.
	Dicronychus	obesus	Krynicki	1832	235969	http://www.faunaeur.org/full_results.php?id=235969	Alonso-Zarazaga,Miguel A.	Cate,Peter C.
Pteromalidae	Pteromalus	obscurus	Nees	1834	75339	http://www.faunaeur.org/full_results.php?id=75339	Noyes,John	Noyes,John
	Pteromalus	obscurus	Thomson	1878	75340	http://www.faunaeur.org/full_results.php?id=75340	Noyes,John	Noyes,John
Achipteriidae	Achipteria	oudemansi	Jacot	1929	174623	http://www.faunaeur.org/full_results.php?id=174623	Magowski,Wojciech	Niedbala,Wojciech
	Achipteria	oudemansi	van der Hammen	1952	174624	http://www.faunaeur.org/full_results.php?id=174624	Magowski,Wojciech	Niedbala,Wojciech
Mymaridae	Polynema	palustre	Soyka	1940	74194	http://www.faunaeur.org/full_results.php?id=74194	Noyes,John	Noyes,John
	Polynema	palustre	Soyka	1956	74195	http://www.faunaeur.org/full_results.php?id=74195	Noyes,John	Noyes,John
Scelionidae	Trimorus	pedestris	Dahl	1912	83573	http://www.faunaeur.org/full_results.php?id=83573	Noyes,John	Johnson,Norman
	Trimorus	pedestris	Kieffer	1908	83574	http://www.faunaeur.org/full_results.php?id=83574	Noyes,John	Johnson,Norman
Eulophidae	Cirrospilus	pulcher	Girault	1913	71702	http://www.faunaeur.org/full_results.php?id=71702	Noyes,John	Noyes,John
	Cirrospilus	pulcher	Masi	1911	71700	http://www.faunaeur.org/full_results.php?id=71700	Noyes,John	Noyes,John
Mymaridae	Polynema	pulchrum	Soyka	1940	74209	http://www.faunaeur.org/full_results.php?id=74209	Noyes,John	Noyes,John
	Polynema	pulchrum	Soyka	1956	74210	http://www.faunaeur.org/full_results.php?id=74210	Noyes,John	Noyes,John
Apidae	Nomada	pusilla	Lepeletier	1841	233077	http://www.faunaeur.org/full_results.php?id=233077	Noyes,John	Polaszek,Andrew
	Nomada	pusilla	Rossi	1792	233078	http://www.faunaeur.org/full_results.php?id=233078	Noyes,John	Polaszek,Andrew
Eurytomidae	Tetramesa	robusta	Walker	1871	73053	http://www.faunaeur.org/full_results.php?id=73053	Noyes,John	Noyes,John
	Tetramesa	robusta	Zerova	1965	73054	http://www.faunaeur.org/full_results.php?id=73054	Noyes,John	Noyes,John
Staphylinidae	Staphylinus	ruficornis	Latreille	1804	260731	http://www.faunaeur.org/full_results.php?id=260731	Alonso-Zarazaga,Miguel A.	Alonso-Zarazaga,Miguel A.
	Staphylinus	ruficornis	O. Costa	1839	260732	http://www.faunaeur.org/full_results.php?id=260732	Alonso-Zarazaga,Miguel A.	Alonso-Zarazaga,Miguel A.
Hydrophilidae	Sphaeridium	rufipes	Schrank	1785	189233	http://www.faunaeur.org/full_results.php?id=189233	Alonso-Zarazaga,Miguel A.	Ribera,Ignacio
	Sphaeridium	rufipes	Thunberg	1794	189234	http://www.faunaeur.org/full_results.php?id=189234	Alonso-Zarazaga,Miguel A.	Ribera,Ignacio
Habronematidae	Cyrnea	seurati	Lopez Neyra	1918	228015	http://www.faunaeur.org/full_results.php?id=228015	Gibson,David	Gibson,David
	Cyrnea	seurati	Skrjabin	1917	228018	http://www.faunaeur.org/full_results.php?id=228018	Gibson,David	Gibson,David
Diapriidae	Aclista	striolata	Kieffer	1909	156964	http://www.faunaeur.org/full_results.php?id=156964	Noyes,John	Johnson,Norman
	Aclista	striolata	Thomson	1859	156963	http://www.faunaeur.org/full_results.php?id=156963	Noyes,John	Johnson,Norman
Figitidae	Kleidotoma	tetratoma	Hartig	1841	80205	http://www.faunaeur.org/full_results.php?id=80205	Noyes,John	Ronquist, Fredrik,Forshage, Mattias
	Kleidotoma	tetratoma	Thomson	1862	80204	http://www.faunaeur.org/full_results.php?id=80204	Noyes,John	Ronquist, Fredrik,Forshage, Mattias
Eulophidae	Entedon	tibialis	Nees	1834	72283	http://www.faunaeur.org/full_results.php?id=72283	Noyes,John	Noyes,John
	Entedon	tibialis	Szelényi	1978	72286	http://www.faunaeur.org/full_results.php?id=72286	Noyes,John	Noyes,John
Scelionidae	Trimorus	varicornis	Thomson	1859	83611	http://www.faunaeur.org/full_results.php?id=83611	Noyes,John	Johnson,Norman
	Trimorus	varicornis	Walker	1836	83612	http://www.faunaeur.org/full_results.php?id=83612	Noyes,John	Johnson,Norman

## Sheet: Genus names
Accepted genus name homonyms / duplicates
Family	Parent	Genus	Author	Year	Id	GC	TS
Pyrochroidae	Agnathinae [Subfamily]	Agnathus	Germar	1818	124637	Audisio,Paolo	Nardi,Gianluca
Tenebrionidae	Lagriini [Tribe]	Agnathus	Germar	1818	282394	Audisio,Paolo	Fattorini,Simone
Ctenacaridae	Ctenacaridae [Family]	Gilarovella	Lange	1973	175389	Magowski,Wojciech	Niedbala,Wojciech
Eriophyidae	Phyllocoptini [Tribe]	Gilarovella	Mitrofanov, Sekerskaya & Sharonov	1983	93953	Magowski,Wojciech	de Lillo,Enrico
Ichneumonidae	Hemigasterini [Tribe]	Giraudia	Förster	1869	162383	van Achterberg,Kees	Zwakhals,Kees
Pseudococcidae	Pseudococcidae [Family]	Giraudia	Goux	1989	98584	Burckhardt,Daniel	Danzig,Evelyna
Chrysomelidae	Eumolpini [Tribe]	Pales	Chevrolat	1837	115196	Audisio,Paolo	Audisio,Paolo
Tachinidae	Exoristinae [Subfamily]	Pales	Robineau-Desvoidy	1830	144998	Pape,Thomas	Tschorsnig,Hans-Peter
Genus synonym name homonyms / duplicates
Family	Parent (accepted genus)	Genus (synonym)	Author	Year	Id	GC	TS
Mycetophagidae	Esarcus	Atritomus	Reitter	1877	124167	Audisio,Paolo	Nikitsky,Nikolai
Mycetophagidae	Eulagius	Atritomus	Reitter	1877	124273	Audisio,Paolo	Nikitsky,Nikolai
Eulophidae	Tetrastichus	Ennetoma	Dahlbom	1857	70188	Noyes,John	Noyes,John
Eurytomidae	Eurytoma	Ennetoma	Dahlbom	1857	73165	Noyes,John	Noyes,John
Craspedosomatidae	Helvetiosoma	Eucharisoma	Brolemann	1935	149089	Enghoff,Henrik	Enghoff, Henrik,Desmond Kime, Richard
Craspedosomatidae	Pyrgocyphosoma	Eucharisoma	Brolemann	1935	149233	Enghoff,Henrik	Enghoff, Henrik,Desmond Kime, Richard
Lampyridae	Pelania	Lampronetes	Motschulsky	1853	120518	Alonso-Zarazaga,Miguel A.	Geisthardt,Michael
Lampyridae	Lampyris	Lampronetes	Motschulsky	1853	120552	Alonso-Zarazaga,Miguel A.	Geisthardt,Michael

## Sheet: Higher taxa accepted
Accepted higher taxon name homonyms / duplicates
Parent	Taxon	Author	Year	Id	URL	GC	TS
Cephalobaenida [Order]	Linguatulidae [Family]			14776	http://www.faunaeur.org/full_results.php?id=14776	Boxshall, Dr Geoffrey	Boxshall, Dr Geoffrey
Porocephalida [Order]	Linguatulidae [Family]			54067	http://www.faunaeur.org/full_results.php?id=54067	Boxshall, Dr Geoffrey	Boxshall, Dr Geoffrey
Trichiinae [Subfamily]	Trichiini [Tribe]			246976	http://www.faunaeur.org/full_results.php?id=246976	Alonso-Zarazaga, Dr Miguel A.	Krell, Dr Frank-Thorsten
Hygromiinae [subfamily]	Trichiini [Tribe]			276127	http://www.faunaeur.org/full_results.php?id=276127	Bank, Ruud A.	Bank, Ruud A.

## Sheet: Higher taxa all
Higher taxa accepted name-synonym homonyms / duplicates
Taxon	Status	Valid as
Anthroleucosomatidae	accepted taxon name	Anthroleucosomatidae (Family)	Enghoff
Anthroleucosomatidae	synonym taxon name	Anthogonidae (Family)	Enghoff
Anthroleucosomatidae	synonym taxon name	Vandeleumatidae (Family)	Enghoff
Blaniulidae	accepted taxon name	Blaniulidae (Family)	Enghoff
Blaniulidae	synonym taxon name	Galliobatidae (Family)	Enghoff
Blaniulidae	synonym taxon name	Nemasomatidae (Family)	Enghoff
Blaniulidae	synonym taxon name	Rhopaloiulidae (Family)	Enghoff
Blaniulidae	synonym taxon name	Trichoblaniulidae (Family)	Enghoff
Cerylidae	accepted taxon name	Cerylidae (Family)	Audisio
Cerylidae	synonym taxon name	Cerylonidae (Family)
Cryptopidae	accepted taxon name	Cryptopidae (Family)	Enghoff
Cryptopidae	synonym taxon name	Plutoniumidae (Family)	Enghoff
Desmodorida	accepted taxon name	Desmodorida (Order)	Bongers
Desmodorida	synonym taxon name	Chromadorida (Order)	Bongers
Geophilidae	accepted taxon name	Geophilidae (Family)	Enghoff
Geophilidae	synonym taxon name	Dignathodontidae (Family)	Enghoff
Geophilidae	synonym taxon name	Linotaeniidae (Family)
Mysmenidae	accepted taxon name	Mysmenidae (Family)	Helsdingen
Mysmenidae	synonym taxon name	Anapidae (Family)	Helsdingen
Nannodastiidae	accepted taxon name	Nannodastiidae (Family)	Pape
Nannodastiidae	synonym taxon name	Chyromyidae (Family)	Pape
Nemasomatidae	accepted taxon name	Nemasomatidae (Family)	Enghoff
Nemasomatidae	synonym taxon name	Blaniulidae (Family)	Enghoff
Nemasomatidae	synonym taxon name	Trichonemasomatidae (Family)	Enghoff
Phaeomyiidae	accepted taxon name	Phaeomyiidae (Family)	Pape
Phaeomyiidae	synonym taxon name	Sciomyzidae (Family)	Pape
Rachiceridae	accepted taxon name	Rachiceridae (Family)	Pape
Rachiceridae	synonym taxon name	Xylophagidae (Family)	Pape
Sphincterochilidae	accepted taxon name	Sphincterochilidae (Family)	Bank
Sphincterochilidae	synonym taxon name	Sphincterochilidae (Family)	Bank
