# Supplementary material for: Fauna Europaea – all European animal species on the web
Source: Biodivers Data J. 2014 Sep 17;(2):e4034. doi: 10.3897/BDJ.2.e4034 (PMC4206781; doi:10.3897/BDJ.2.e4034)
Supplement: Supplementary material 7 — Fauna Europaea species statistics for areas [file biodiversity_data_journal-2-e4034-s007.xlsx]

## Sheet: Species numbers versus areas
Countries	Country code	Species present	Species doubtful present	Subspecies present	Subspecies doubtful present
Andorra	AD	3852	63	264	8
Albania	AL	8639	209	1074	22
Austria	AT	32878	404	1997	23
Bosnia and Herzegovina	BA	10867	231	1362	17
Belgium	BE	18560	211	932	19
Bulgaria	BG	24134	243	1705	12
Belarus	BY	7739	202	546	14
Switzerland	CH	26743	297	1604	18
Cyprus	CY	5682	176	520	19
Czech Republic	CZ	29857	298	1464	18
Germany	DE	39944	477	1973	20
Danish mainland	DK-DEN	17411	118	830
Faroe Is.	DK-FOR	1251	39	82
Estonia	EE	11329	130	597	11
Balearic Is.	ES-BAL	4497	151	423	15
Canary Is.	ES-CNY	7525	118	540	6
Spanish mainland	ES-SPA	37152	548	2856	52
Finland	FI	22298	223	1028	9
Corsica	FR-COR	9451	189	776	19
French mainland	FR-FRA	41993	414	3248	26
Channel Is.	GB-CI	2625	32	123	9
Gibraltar	GB-GI	1246	50	76	3
Britain I.	GB-GRB	27478	324	1072	11
Northern Ireland	GB-NI	3637	236	169	5
North Aegean Is.	GR-AEG	9450	284	844	23
Cyclades Is.	GR-CYC	1898	46	193	9
Dodecanese Is.	GR-DOD	3433	52	396	9
Greek mainland	GR-GRC	21156	294	2076	23
Crete	GR-KRI	5373	127	590	14
Croatia	HR	16470	279	1702	26
Hungary	HU	31179	361	1649	34
Ireland	IE	11403	556	431	49
Iceland	IS	2070	51	107	2
Italian mainland	IT-ITA	42609	551	3466	54
Sardinia	IT-SAR	9450	284	844	23
Sicily	IT-SI	12322	304	1133	29
Liechtenstein	LI	3532	61	344	7
Lithuania	LT	11887	124	586	16
Luxembourg	LU	6587	92	541	10
Latvia	LV	12696	183	679	20
Monaco	MC	349	17	23
Moldova, Republic of	MD	8425	184	560	13
Macedonia	MK	10635	264	1067	20
Malta	MT	3452	78	292	9
The Netherlands	NL	20324	185	949	7
Norwegian mainland	NO-NOR	16669	122	759	6
Svalbard & Jan Mayen	NO-SVA	521	24	28
Poland	PL	31318	322	1708	25
Azores	PT-AZO	2213	68	146	6
Madeira	PT-MDR	3812	101	270	5
Portuguese mainland	PT-POR	13317	293	1051	29
Selvagens Is.	PT-SEL	283	11	19	1
Romania	RO	26343	407	1925	27
Franz Josef Land	RU-FJL	227	47	6
Kaliningrad Region	RU-KGD	4514	622	312	50
Novaya Zemlya	RU-NOZ	635	78	24	1
Russia Central	RU-RUC	16960	770	717	59
Russia East	RU-RUE	9179	1120	568	89
Russia North	RU-RUN	11957	729	618	48
Russia South	RU-RUS	14030	920	984	74
Russia Northwest	RU-RUW	11231	1075	533	88
Sweden	SE	25653	175	1044	6
Slovenia	SI	13428	356	1321	27
Slovakia	SK	26080	305	1461	20
San Marino	SM	533	19	18	2
European Turkey	TR-TUE	5904	170	553	19
Ukraine	UA	24113	625	1591	27
Vatican City	VA	92	8	7	2
Yugoslavia	YU	17315	288	1587	29

## Sheet: Family versus areas
Family name / Country code	AD	AL	AT	BA	BE	BG	BY	CH	CY	CZ	DE	DK-DEN	DK-FOR	EE	ES-BAL	ES-CNY	ES-SPA	FI	FR-COR	FR-FRA	GB-CI	GB-GI	GB-GRB	GB-NI	GR-AEG	GR-CYC	GR-DOD	GR-GRC	GR-KRI	HR	HU	IE	IS	IT-ITA	IT-SAR	IT-SI	LI	LT	LU	LV	MC	MD	MK	MT	NL	NO-NOR	NO-SVA	PL	PT-AZO
Acalyptonotidae
Acanthobdellidae
Acanthocnemidae									1								1		1	1					1									1	1	1
Acanthocolpidae			1			1					2	1					1						1								1			2												1		1
Acanthodrilidae		1		1				1			1				1	2	2		2	2	1		1		2		1	2	1		1	1		2	2	2							1					1
Acanthopteroctetidae
Acanthosomatidae		6	7	6	7	6	8	7	1	8	7	7		8		1	7	7		7			5					4		6	7	3		6			5	8	7	7		2	3		7	7		7
Acanthostomidae											1												2
Acaridae
Acaronychidae																	1
Acarophenacidae											4						3						1								1																	1
Acartiidae											1			1	1	1		2		6			3					2					1	7		1				2					1	3			1
Acartophthalmidae			2					2		2	1	1					2	3					1								3
Accipitridae	16	25	25	25	22	27	20	23	25	26	25	25	7	19	21	13	29	24	15	28	7	19	16	7	19	15	19	27	19	25	25	14	10	25	19	17		18	14	18		23	25	13	24	20		26	2
Acerentomidae			22	12		2		4		13	16	2			2	8	12		6	22			5		8			5			3	2		23	8				10									31	2
Acherontacaridae
Achilidae			1	1		3				2	2			1				2		2					1			2	1		1			3	1	3
Achipteriidae			14			5	2	5		5	5	2				1	15	7		5			8					3			7			14											4	3		12
Achromadoridae			3		1					1	4														2						5			3	2	1		1							4			4
Aciculidae		5	5	4	2	3	1	3		2	6	1		1			9			13		1	1	1	1			9		10	3	1		21	1	3	2	1	1	1		1	1		2			2
Acipenseridae		2		3	1	6					1			1	2		2	1	3	3		1	1		3	2	2	2	2	2	3	1	1	3	3	3		1		1		3			1	1		1
Aclerdidae			2														1			1			1
Acoleidae						2		2		1	2																				2			3
Acrididae	8	51	66	65	23	73	23	51	30	43	36	16	1	17	32	44	114	17	25	86	5		11	3	43	16	32	85	20	60	56	5		111	43	44	22	23	20	23		61	65	21	20	15		35	5
Acrobothriidae								1			1			1			1	2		1			1										2	2				1		1						2	1	1
Acroceridae		1	5	1	3	4	2	8	2	4	7	2	1	2	1	2	12	5	1	12			2		1		1	2	1	3	7	2		14	1	2	1	2	1	2		2	1	1	6	2		6
Acroloxidae		1	1	1	1	1		1		1	1	1		1	1		1	1	1	1			1	1				1		1	1	1		2		1		1	1	1			3		1	1		1
Actaletidae					1												1			1			1
Actinolaimidae			1		1					1	1			1			2			1					1						3			3	1	2									1			1
Acuariidae		1			1	23	1			1	6	2		10			15			6			11								6		25	15				5		6		11			2		2	15
Adamystidae																				2
Adelgidae			13	3	4	7		8		11	18	12					1	8		2			13							2		6	1	19		3		4		12		3	1		9	2		11
Adelidae		26	33	18	20	19	4	25	2	28	29	20		16			26	16	4	33	6	1	15	7	2	1	2	14	2	18	28	12		32	2	6	1	17	9	16		3	16	1	19	14		28
Adelphacaridae											1
Aderidae		1	8	2	1	2	4	5	3	7	8	5		3	3	5	5	7	7	12		1	3		7		2	5	2	5	7			14	7	6		2		5				2	3	6		6
Adiheterothripidae																1	1		1	1								1								1
Adinetidae			5		2	1	1	5			9					4	2			3			5		1		2				3	5	1	2	1										5	1	3	5
Adrianichthyidae
Aegialiidae			1		1	2		2		1	2	2		1		1		1		3			3											2				3		3					2	3		3	1
Aeginidae																																														1
Aegithalidae	1	1	1	1	1	1	1	1		1	1	1		1	1		1	1	1	1	1	1	1	1			1	1		1	1	1		1		1		1	1	1		1	1		1	1		1
Aeolosomatidae			2		1	1	2	4		6	14	4		2			1	5		11			6		1					4		2		6	1			4		4		3			7			12
Aeolothripidae	1	8	12	1		19		12	9	19	18	8		3	1	14	45	6	5	26			14		8			15	6	10	12			24	8	14		2	1	4		9	6	2	14	7		11	3
Aepophilidae																	1			1			1									1
Aeroglyphidae
Aeshnidae		9	12		11	11	12	13	5	12	13	10		10	6	3	8	10	9	13	5		11	2	9	3	6	8	6	11	11	4	1	12	9	9	5	11	9	12		6	8	2	12	7		13	1
Aetalionidae
Aetholaimidae																																													1
Agamidae									1																	1																		1
Agaonidae																3				2								1		1				2		2
Agelenidae	7	2	14	8	14	35	2	18	5	10	16	7		3	8	8	33	5	15	31	3	2	12	5	18	9	10	24	14	27	12	9	1	40	18	16	12	4		3		8	23	4	12	4		11	6
Agfidae																				1
Agriolimacidae	7	4	8	3	5	10	2	7	3	8	8	5	3	3	3	3	17	3	6	12	3	3	4	3	4	10	7	17	9	8	7	4	3	9	4	2	2	4	5	3		3	4	3	5	4		9	3
Agromyzidae	1	13	231	1	132	36	59	141	2	373	559	265	11	152	16	68	235	234	46	359	10		376		18	3	11	17	12	11	209	113	19	211	18	41		395		65	2	23	1	21	194	154		467	19
Agyrtidae			3		1			2		4	4			1			1	2		3			1					2		1	4			3					1						2	1		4
Ailoscolecidae																				1
Alaimidae			9		4			4		12	8	1		2											1			1			24			9	1	3		3		2		2			18		1	18
Alaudidae	6	6	9	6	5	7	4	8	8	6	9	5	2	4	7	8	9	10	5	8	2	7	9	2	4	5	5	12	5	6	5	5	3	12	4	5		4	5	4		9	6	13	6	9		8	1
Alcedinidae	1	1	1	1	1	1	1	1	1	1	1	1		1	1		1	1	1	1	1	1	1	1	1	1	1	1	1	1	1	1		1	1	1		1	1	1		1	1	1	1	1		1
Alcidae			4		6	1		2		4	7	7	7	4	4	4	6	6	1	7	4	4	8	6	1					3	2	7	8	3	1			3		5				4	7	7		6	5
Aleureodamaeidae
Alexiidae		5	6	9	3	8		4		3	4	1					3	1		3			1							3	6			12		1		1	3				2		3	1		3
Aleyrodidae		3	14		3	7		8	6		16	7			4	8	23	10	13	27	2		19		7		8	17	9		19	3		26	7	17		4		1				9	10	4		13	1
Algophagidae
Alicorhagiidae										2	1																						1	1												1	2
Alirhabditidae																																										1
Allantonematidae											63	4								4			5
Allocreadiidae		2	4			5	1	1		8	4	2					3	5		2			5								2	3	1	4				6		5		1				5		8
Alloionematidae			2								3			1			1			1											2			1											1			2
Alloptidae								2			3		4							4			10		1						1			9	1										2			10
Alucitidae		2	5	4	2	4	1	4	1	5	6	2		3	1	1	10	2	3	11	1	1	1		6		3	5	3	8	6	1		14	6	6		1	1	1		1	8	2	2	2		5
Alycidae			3					3	1	2	4						2	4	1	9												3		9											1	4		3
Alydidae	1	3	4	4	2	3	1	4	2	2	2	1		1		4	5	1		5			1					4		4	3			6			2	1	1	1		2	3	2	1	1		1
Amabiliidae						10		2		6	4	1		1			1			3			5								4			2						1								8
Amaurobiidae	4	2	13	4	6	23	2	14		8	12	5		2		1	12	3	4	19	2		5	3		2	2	13	6	14	13	3		28		4	8		3	1		3	15	1	5	3		9
Amblyommidae		12	2	2	3	18	4	7	6	8	9	3			2	9	16		8	17		1	5	1	13	3	8	15	7	8	5			17	13	12						2	11		2	1		5	8
Ameiridae		1	5		2	14		1		1	12	2		3	2	1	13	5	1	12			7		4		3	7	1	2	3	3		18	4	1				1			5	1	3	4		4	1
Ameletidae			1			2		1		2	2							1		2			1							1	1	1							1				1			1		2
Ameridae			1					1			1	1					2														1			2											1			2
Amerobelbidae			1														2			3			1					3			3			7
Ameronothridae										1	4						2	3					3					1		1	1														1
Ameroseiidae
Ametropodidae			1			1					1	1		1				2													1			1				1		2					1	2		1
Amidostomidae					1	7					3			3			2	1		2			6								3		1	3				6		4		2				1		8
Amorphoscelididae															1		1			1
Amphientomidae									1							1										1
Amphilinidae						1																									1			1
Amphipsocidae			1					1			1	1					2	1		2			1								1					1			1	1					1	1		1
Amphisbaenidae									1								1					1				1	1
Ampulicidae	1		3		2	2	1	3		1	3	1		1			5	2	3	4		1	1		2			2			1			4	2	2			1	1				1	1	1		1
Anajapygidae																											1							1
Analgidae			1			2		13		3	22						1			10			20		3						3			23	3							20			11			14
Anapidae			1		1			1		1	1												1					1			1			3											1
Anatidae	11	31	37	24	48	36	31	41	25	38	55	48	37	41	29	27	51	48	15	57	29	17	59	33	16	13	17	34	15	32	34	48	49	42	16	16		37	22	35		26	26	28	56	51		45	30
Anatonchidae			4		1	4		3		3	5	1	1				6						2		1						5			2	1	1									2	1		8
Ancylostomatidae		4	2		3	4	4				5	1		3			9			3			6		1			2			3		2	10	1	1		2		1					1			9	3
Ancyrocephalidae			5			5	4			8	3	1					3	2		5			3								9			7			2	2		6						2		8
Andrassyidae																																																1
Andrognathidae																				1								3	1	1				3		1
Angiostomatidae											1									4
Angiostrongylidae			1			3	1				1	1			1		6			2			4								1			5		2												2
Anguidae	1	2	1	2	1	2	1	1		1	1	1		1	1			1		1			1					3		2	1			1			1	1	1	1		1	2		1	1		1
Anguillicolidae		1	1		1					1	1	1					1			1			1								1	1		2						1					1			1
Anguillidae		1		1	1	1	1	1	1	1	1	1	1	1	1	1	1	1	1	1	1	1	1	1	1	1	1	1	1	1		1	1	1	1	1		1		1	1	1		1	1	1		1	1
Anguinidae			5		5	1		1	3	22	15	2		11		5	15	1					6							2	10			11				12		10		1			11	3		38	1
Anisakidae		4	1			8		1		4	10	3	1	1			9	2		4			9					1			5	1	6	12				4		6		3			1	6	2	11
Anisitsiellidae
Anisolabididae				1		1									3	5	7			3			3		3		1	4	1	3				3	3	3								2	1				2
Anisopodidae	3		4		5			7		4	5	4		1		1	2	4		3			4								3	4		3			3			3					6	4		4
Anobiidae	1	16	124	50	68	65	41	89	58	101	120	57	5	35	41	68	159	64	74	164			62		78	6	4	129	11	94	83	22	6	165	78	79	10	39	12	52		18	29	22	63	51		91	19
Anoplocephalidae		2	4			20	5	3	1	7	10	1		2	2	4	26	6		12			10								12	4	2	23		3		5		2		1		2	2	2		13	3
Antennophoridae
Antennoseiidae
Anthicidae		31	30	27	2	40	11	24	36	20	26	12		10	21	23	116	10	45	64		19	13		55	15	21	82	37	56	33	4		71	55	60	2	11		12	1	12	8	24	12	10		23	5
Anthocoridae	14	10	40	19	34	36	23	38	8	41	46	25		24		28	46	30		47			33					25	1	30	28	17		47		2	8	13	30	13		20	25	12	40	24		39	5
Anthogonidae		1		2													4			10			1							5
Anthomyiidae	50	3	176	4	86	33		175	13	240	233	217	15	30	16	24	174	273	35	210			242		3		10	87	28	32	125	46	33	189	3	22	1	24	1	46	1	2	1	8	111	254	2	180	6
Anthomyzidae			7		3	5		11	1	18	11	4		10	1	2	6	9	1	5			20			1		1	1	1	9	6	1	8				2		5				3	8	3		11
Anthribidae		5	23	9	12	23	6	10		23	24	16		8			26	11	5	26			8	1	8			16	1	10	14	1		28	8	9		6	11	8			6		11	10		22
Anthroleucosomatidae
Anyphaenidae	2		1		1	2	1	1		2	2	1		1	1		4	1	2	4			1	1	2			2		2	1	1		3	2	1	1	1		1		1	1		1	1		1	1
Anystidae			1								10						1			7											2			2											3			2
Apataniidae			2		2		1	2	1	2	4	3	1				3	6		3			2					3			1	3	1	2				2	1	2					1	8	1	5
Aphelacaridae																	1	1		1			1					1						1														1
Aphelenchidae					1				1	1	1			1				1												1	1			1				1		1		2				1		2
Aphelenchoididae			5		9	1			4	31	16			6				1		1			2							1	13	1		16		2		10		2		3			16	4		23	4
Aphelinidae			14	1	8	13	1	22	14	48	50	4				9	70	6	8	60	2		43	7	3			31		18	57	3		104	3	25		1			1	29	4	6	11	1		26	1
Aphelocheiridae			1		1	1	1	1		1	1	1		1			2	1		1			1							1	1	1		1			1	1		1		1			1	1		1
Apheviderulicidae
Aphididae	160	14	501	59	364	419	265	368	55	666	682	452	16	227	96	113	603	429	163	644	8		630	27	173			153	7	121	461	210	47	649	173	382	1	287	1	371	1	342	119	2	356	344	4	688	126
Aphodiidae	3	35	90	70	60	63	45	73	35	64	81	47	1	44	17	18	123	44	42	108		4	57	29	47	2	7	88	9	78	86	28	2	116	47	70		40	7	46		1	37	20	51	38		80	6
Aphrophoridae		11	14	3	11	11	1	11	3	13	14	9		10	3	2	11	8	1	15	1	1	9		7	2	2	13	3	6	11	6		15	7	7		11		10		5	4	2	10	9		15	1
Apidae	17	46	666	11	382	206	7	629	191	560	569	219	8	15	117	123	1056	228	121	899	11	20	261	7	253	27	47	589	202	165	688	25	2	842	253	501	15	319	275	18	10	33	113	21	94	49	1	542	4
Apionacaridae																				1			1											1
Apionidae	2	13	133	48	73	137	9	107	31	118	123	81	1	65	40	19	155	52	81	183	6	3	87	26	84	3	9	82	19	110	137	36		186	84	116	1	44		62		85	13	17	88	49		120	2
Apodidae	2	3	2	3	2	3	1	3	4	2	2	2	1	1	3	5	6	3	3	3	1	4	5	1	2	3	3	4	3	3	2	4	2	4	2	3		1	1	1		2	3	5	3	3		2
Aporcelaimidae			14		6	1	1	4		8	16	1		4			14			5			3		2			1			19			13	2	3		4		2		3			17	2		18
Apororhynchidae										1																					1																	1
Aproctidae						1											3			2			1								1			3								1						2
Aradidae	6	13	27	16	5	24	12	17	2	25	24	8		9		5	25	19		31			7		1			24		17	24	1		28	1		5	3	4	12		9	11		5	15		18
Araneidae	17		50	5	39	56	32	47		43	49	31		33	8	19	57	36	31	62	7		33	12	30	13	22	40	9	51	52	19	5	61	30	25	28	32		34		23	47	11	35	34		46	7
Archeonothridae
Arctacaridae
Arctopsychidae																		1																						1						1
Ardeidae	7	9	8	8	9	9	7	9	9	8	9	10	7	6	7	12	11	8	5	12	7	8	11	3	9	9	9	10	9	9	9	10	11	11	9	9		8	7	6		9	8	10	9	10		9	16
Argasidae			1		2	4		3	2	3	4	2				1	7		2	5	1		4		1			5				2		7	1	2										1		3	1
Argidae	2	10	33	8	16	20	5	21	4	25	33	18		14	1		20	19	5	25			14		3			6	3	32	28	7		30	3	7	2		14	15			16		18	5		19
Argnidae		5	2	2		4		1									2			3								6		3	2			5									1					1
Argulidae			1		1			1		1	3	1		2			2	2		3	1		3	1							1	2		1				2		2					1	2		3	1
Argyresthiidae		1	31	8	25	11	11	33		30	29	25		24			16	23	2	33	11		24	11	4			4		12	22	17		27	4	2	5	18	13	24			6		28	26		30	2
Arhythmacanthidae																	1			1														2
Arionidae	7	3	9	4	9	5	1	11		10	13	9	7	2	3	1	25	7	2	17	7	2	13	12	1			1		6	6	14	8	11	1	1	5	6	9	5		1	3		9	9		8	3
Armadillidae		1													1	1	2			1					1	2	2	2	2					1	1	1								1				1
Armadillidiidae		13	12	13	7	7		6	4	6	8	5		4	10	3	15	6	13	23			9	2	10	9	7	79	12	20	8	5		67	10	12		3	1	3				5	8	4		6	6
Arrenuridae
Arrhopalitidae			8		3	1		6		4	16						12	5	2	17			6		2						12	2	1	9	2	2				1						4	2	6	1
Artematopodidae																																		1		1
Artemiidae						1			1		1				1	1	1			2			1		1			1						1	1	1
Arthropleidae			1							1	1							1					1																							1		1
Ascalaphidae	1	3	2	1		3		2		2	2						9		3	9					3	1	1	4	2	3	1			8	3	5	1					1	2					1
Ascarididae		5	4		4	15	7	1		2	11	3		8			17	5		6			15		1			3			9	4	5	17	1	1		12		6		3			5	1		18	3
Ascaridiidae		2				5	1					1		2			4	1		1			3											5				1		1		2				1		4	1
Ascidae
Ascouracaridae						1
Asellidae		3	5	4	4			5		3	5	1			1		43		2	22		1	2		2			5	4	2		1		18	2	2							6		4			2
Asilidae		51	103	45	43	96	1	104	11	68	80	31			2	23	148	31	5	164		2	28	1	9	9	15	152	2	44	68	3	1	131	9	13	1		1				4	8	36	18		82
Asiopsocidae																	1
Aspidogastridae			1							1	2									1											1																	1
Asplanchnidae
Assimineidae					1						1	1			3	1	4		1	6			2		1					1		1		4	1	2								1	1				2
Astacidae	1	2	4	3	3	3	2	5		4	5	3		1			2	3	1	5			4	1				2		4	3	1		5			2	3	3	3		2	2		3	1		3
Astegistidae			7		1			1		3	2						2	4					4								4			2												2		5
Asteiidae	3		4		4	1		7	1	7	7	3		1	5	3	10	5		2			7					1			6	3		2		1												7	1
Asternoseiidae
Asterolecaniidae			4			3		1		3	5	2					5		1	7			5		4			2		4	5	1		9	4	5				1					4			2
Atelestidae			1		2			2		2	3	1						2					2							1	2	1													1
Atemnidae			1			2		1	1						1	2	1			1					1			2	1	1	1			1	1	1							1
Athericidae		1	2	2	3	2		2		3	3	2					4	1		4			3					1		3	2	2		3				1							3	1		3
Atherinidae		1				1			1						1		1		1	1		1	1		1	1	1	1	1					1	1	1					1				1
Atherinopsidae																									1									1	1	1
Athienemanniidae
Atopochthoniidae			1																	1			1																									1
Atopomelidae
Atractidae		1													1		1			1			1		1								1	3	1													1
Atrochidae
Attelabidae		1	3	2	2	3		3	1	3	3	1					3		1	3			2		1			2		2	3			3	1	1		1	1				3		2			3
Attemsiidae			10								1																			4				2
Aturidae
Atyidae				3	1						1	1					3		1	2								1		2				2											1
Atylenchidae											2						1																															1
Atypidae			3	1	2	2	1	3		3	3	1					1			2	1		1					1		1	2	1		3			1					3	2		2			3
Aulacidae		1	6		1	3		3		5	6					1	4	1		6			1		1			1	1		7			5	1	2						1	1		1	1		2
Aulacigastridae	2		1		1	1		3		1	3	1				1	1	1		2			1					1		1	3	1		2														1
Aulolaimidae			1								2			1																	7			2											2			1
Aulolaimoididae								1																							2
Auridistomidae						1											1
Austrachipteriidae						1																												1
Autognetidae			5	1		1				2	2	1					4	3		2			5					1			2			3											3	1	1	5
Autostichidae		8	13	2	3	10		7	8	5	7	2			4	14	54	1	11	19	3	5	4		11	2	4	27	16	13	11	1		26	11	9	1	1	1		1		12	8	2	1		2	1
Avenzoariidae						2	1	1		3	13		1							15			13		2			2					1	17	2							3			6			21
Axymyiidae
Azecidae	1	1		1	1						1						3		1	3			1		3			3		1				2	3	3			1
Azygiidae						1				1	2							2					1					1										1		1						1		2
Bacillidae									1						2	1	2		2	2					3		1	3	1	2				3	3	6													1
Baetidae		2	24	7	12	29	1	19		20	28	17		2	8	6	44	19	7	36	3		14	9	9		6	12	1	6	11	10		24	9	12		20	13	13			19		18	16		36
Balitoridae			1		1	2	1	1		1	1	1		1	1		1	1	1	1			1		1	1	1	1	1	1	1	1		1	1	1	1	1	1	1		1			1			1
Banksinomidae			6					2		2	4	1				1	6	3		1			4					1			5			4											2	1	1	4
Barbutiidae
Barentsiidae					1						1									1											1
Bastianiidae			2							1	3			1																	2			3				1		1					3			2
Bataguridae
Bathynellidae			3			1	1	2		3	6						2			18			2		1						1	1		4	1								2		1			1
Bathyodontidae			1								2	1											1								1														2			2
Bathytropidae						1									1		1			1							2	1	1							4
Batrachedridae			2		2		2	2		2	2	2		2			3	2		3	1		3	1	1			1	1		2	1		3	1	1		2		2				1	2	2		2
Bdellidae
Bdellouridae											1						1																												1
Bedelliidae			1	1	1	1	1	1		2	1	1		1		2	2	1		2	1	1	1		2			1		2	2	1		2	2	1	1	1	1	1			1	1	1	1		1	1
Beesoniidae																																		1		1
Behningiidae																																																1
Belbidae			14		1	5		2		7	9	5				2	12	4		2			3								6			10											3	1		13
Belbodamaeidae			4		1	1				2	2	2					4	2		3			2					1			2			2											1			3
Belondiridae			4		1			5		4	5			1			18			2			3								18			8		2			1			4			13			5
Belostomatidae		1				1																						1		1													1
Bembidiacaridae
Beraeidae	1	4	7	5	4	5	3	6	1	6	5	4		2			6	2	4	10	2		4	3	5	2		10	2	5	5	3		13	5	3		2	3	4			1		4	3		6
Berothidae		1				1											1		1	1								1						1									1
Berytidae	1	12	13	15	8	19	6	10	10	14	11	8		6		8	20	6	2	18			9					20		18	16	6		20			4	4	8	4		9	16	2	9	6		8
Bethylidae		10	3	1	3				2	4	29				2	3	30	8	6	53		7	21		8			19	1	2	24	2		41	8	13						4			4
Bibionidae	9		23		18	2		23		20	19	16	3	5	1	4	20	16	6	24	7		18	11	8		2	4		1	12	12	3	15	8	8	2	2		6				1	6	17		18
Biokoviellidae																														1
Biphyllidae			3	3	2		2	1		3	2	2				3	1	1	1	2			2		3			2		3	2			3	3	2									1	2		2
Bithyniidae		6	3	1	2	2		2		3	3	3		2	4		2	1	3	2			2	1	1			14	2	4	3	2		4	1	2	1	3	1	2			1		2	1		3
Bittacidae		1	2	1	2			1		1	2						1			2								1		1	2			2					1				1					1
Blaberidae								1				1				4							1										1															1	2
Blackfordiidae							1
Blaniulidae		1	3	1	7	5	2	6		4	6	6		3	2	6	12	6	1	24	3	1	6	5	3			2		1	7	5	2	8	3	4		5	6	3	1	1	1		6	6		7	4
Blasticotomidae
Blastobasidae		1	5	2	3	1	2	3	2	5	5	3		2	1	9	11	4	2	8	3	1	3	1	3	1	1	2	1	3	5	1		5	3	3		3		2		1	2	1	5	2		4	2
Blattellidae	4	8	8	15	5	11	2	13		7	9	4		3	6	18	53	4	8	18	4		5	1	10	1	3	12	3	17	12	2	1	25	10	17		3	5	4		2	9	3	5	2		6	2
Blattidae			3	1	2	2		3	1	1	3	3		1		4	1	3	1	3	2		3	3	2	2	2	2	1	2		3	3	2	2	2		2	2	2			1	2	1	2		3	2
Blenniidae		1		1				1							1		1		1	1					1	1	1	1	1	1				1	1	1
Blephariceridae	2	6	6	6	3	6		5	2	5	7						11		7	11					4	1		6	2	4				10	4	5	4		2				7					5
Bochicidae																	1
Boettgerillidae	1		1		1			1		1	1	1					1	1		1	1		1	1							1	1		1			1	1	1						1	1		1
Bogatiidae
Bogidiellidae	6								1		1				1	3	6		3	2					4			2	1	1				5	4	1							3
Boidae		1				1			1																	1	1	1															1
Bolitophilidae	2		15	3	10	10	1	19		16	22	8		20			10	22	4	15	1		16	1				3		4	8	5		12				2	1	12		4		1	8	14		16
Bombinatoridae	1	1	2	2	2	2	1	2		2	3	1			1		3			2								2		2	2			1				1	2	1		2	1		1			2
Bombycillidae		1	1	1	1	1	1	1		1	1	1		1				1		1			2					1		1	1	1	2	1				1	1	1		1	1		1	1		1
Bombyliidae	5	44	59	21	32	37	2	42	55	50	41	18		1	20	27	186	20	53	144		12	9	1	43	13	48	175	27	80	78	4		248	43	109		14				20	52	22	13	15		37
Borboropsidae			1					1		1	1							1					1								2			1												1
Boreidae			1	2	1			1		2	2	1						1		1			1											2				1	1	1					1	2		2
Boreohydridae											1
Boridae							1				1							1		1																		1		1
Bosminidae	1	1	3		3	2		3		2	5	4	2	4	1		1	5		1			2	2				1			1	2	2	1				5		4		3	1		3	4	1	4
Bostrichidae		1	7	7	1	3	4	6	10	5	5	1		2	9	6	17	3	13	16			6		15		1	11	4	14	7	1		19	15	15		1		3			1	2	1	3		8	2
Bothrideridae		2	9	13	3	3	2	9	1	8	6	4					27		7	16			5		4			7		8	12			33	4	2		2					1					6
Bothriocephalidae		1	1		1	3				2	3	1								1			2					1			3	1		4				3		2					1	3		3
Bothrioplanidae			1					1		1	1	1		1			1	1		1			1																							1
Bougainvilliidae											3							1	1	1			1											1											2	1	1
Bourletiellidae		2	21				4	11	2	3	11	1	1		2	3	23	6	4	23			3				1	2	1		11	4	3	7				2	1					1	3	4		8	4
Bovicoliidae											10						7	4																3														9
Bovidae		1	3	2	1	3	1	3	1	3	3					2	4	1	1	4					1			1	1	2	1			4	1	1	1	2	1				2			1		3
Brachionidae
Brachodidae		2	2			3				1							4			2		1						5		2	2			4		1							3
Brachycentridae	4	2	7	4	6	4	1	7		6	7	3		2			7	4	2	8			1		1			3		3	2			5	1	1		3	4	3			3		3	4		6
Brachyceridae			1	1		1			3						4	1	9		3	5					4	2	1	6	4	4	1			6	4	10						2	1	1
Brachychaeteumatidae					1			1			2	1								8			3	1								2													1	1
Brachychthoniidae			22		6			6		19	15	1					48	20		9			23					15			27			23											4	3		39
Brachycoeliidae						1		1		1	1	1					1		1	1			1		1						1			1	1													1
Brachylaimidae			3		2	8		5		1	9	1			3	2	13	1	1	11			12								4			12								1			2	1		8	1
Brachypauropodidae			2	1						1	1						2		1	3					1			2						1	1													3
Brachystomellidae		2	2	1	1			3		1	1	1				3	2	1	1	3			1						1	2	2	1		2						1					1	1	1	1	1
Braconidae	56	67	950	40	487	974	61	900	110	696	1533	277	20	67	15	156	778	830	55	840	2		1160	63	64	10	56	447	151	224	1864	570	54	972	64	140	23	498	7	142		330	84	6	1087	271	4	1007	18
Bradybaenidae			1	1	1	1	1	1		1	1	1		1				1		1			1					1		1	1			1			1	1	1	1		1	1		1	1		1
Bradynobaenidae																	1											2								1
Bradyporidae	1	3	1	2	1	3		2		1	1				1		56		2	7					3		1	5	1	2	3			9	3	6			1			2	4		1
Brahmaeidae		2	2	2	1	3	1	2		2	2	1		1			2	1		2								3		3	2			3		1		1	1	1			3		1			2
Branchinectidae			2														2	1													2															1	1
Branchiobdellidae			6	4		6				1	4							1		2								2		1	2			5									4		1			1
Branchipodidae			2		1	1		1		2	2	1					3		1	3					3					1	2	1		3	3	2							2	1	1	1		1
Braulidae		1			1	3		1		1	1	1				1	2	1		2			2					1			1	1		2		1									1	1		1
Brentidae		1		1		1			2								1			1					1			1	1	1				1	1	1							1
Brevibuccidae			1								4												2																						1
Bryobiidae
Bucculatricidae		1	23	1	13	2	11	14		19	18	14		16	2	3	11	16	3	30	5		11	2	9		1	4	1	14	21	8		28	9	2		12	4	18			16		13	13		18
Bucephalidae						2				2	2						1	3		2			3								2			2				2		2					1	2		2
Buddelundiellidae											1				2			1	3	3			1		1			2			1			11	1	2								1
Bufonidae	1	2	3	2	2	2	3	2		3	3	3		3	1		2	1	1	3	1		2		1	1	1	2	2	2	2	1		2	1	2		3	2	3		2	2	1	2	1		3
Bunocotylidae											2						3			1					1									1	1
Bunonematidae			13		2					2	22	1		3			5														9			1				1							7			5
Buprestidae	6	130	123	128	30	172	46	87	70	103	97	23		19	34	10	173	22	86	158		2	19		81	26	32	218	95	131	129			180	81	111	8	27	8	27	2	55	134	18	10	31		68
Burhinidae	1	1	1	1	1	1	1	1	1	1	1	1			1	1	1	1	1	1	1	1	1		1	1	1	1	1	1	1	1	1	1	1	1		1	1			1	1	1	1	1		1	1
Buthidae		1							1							1	2			1						1		1															1
Byrrhidae	5	3	25	13	1		3	10	1	24	22	13		9	1	4	26	16	1	43			13		3			11	1	7	9	1	2	40	3	4	2	7		12	1		7		8	16	1	33
Byturidae			2	2	2	2	2	2		2	2	2		2				2		2			2							2	3	2		2				2	1	2					2	2		2
Caeciliusidae			8		7	5		9	2		9	6				4	7	8	2	10			8					5		6	7	6		8					8	5					8	8		8	3
Caeculidae
Caenidae			9	1		8		8		9	10	7			1	1	10	6	1	10	1		9	4	3		1	3	1	1	6	4		12	3	3		6	3	7			3		7	5		10
Calamoceratidae						1											1			1		1				1		1
Caleremaeidae			2			1				1	1						1	1		1			1					1			1			1												1		1
Caligidae											2	2	1	1				2				1	1									1	1				1	1							1	2		1
Caligonellidae
Caliscelidae		2	2		1	3		1	1	1	1	1		1			5	1	2	4					1			7		1	5			10	1	2		1		1		2			1	1		1
Calliphoridae	19	19	57	4	34	24	21	52	8	56	61	37	4	9	7	11	46	41	11	53	1		38	1	9	1	5	24	3	12	57	17	4	58	9	20		15		4		5	10	3	39	45	4	64	1
Callipodidae								1											2	1					4									1	4						1
Calohypsibiidae			2			1		1		1	2		1				1	1		2			1								3	2	1	7		2										1	1	2
Calophyidae			1			1				1							1			1			1					1						1								1
Calopterygidae		2	2		2	2	2	2	1	2	2	2		2	1		3	2	3	4	2		2	1	2	2	1	2	2	2	2	2		4	2	3	1	2	2	2		2	2		2	2		2
Calyptostomatidae			1					1			1		1			1	1			1			1		1						1			1	1											1		1
Camallanidae			1		1	1		1		2	3	1					1	2		2			2					1			2	1		3				2		2					1	2		2
Cambaridae			1	1	1		1	2		1	3				1	1	1			2			2								1			2				1	1						2			1	1
Cambarincolidae																																		1
Camerobiidae					1												2			6									1		2			2											5			3
Camillidae	1		2		1	1		2		4	4					2	6	3					5					3			4	1		2											4			2
Camisiidae			12			8		2		9	8	4					13	14		5			12					2			9			12											5	8		16
Campanulariidae						4	1				4	4	1				3	2		4	2		6	2								4	3	4			1								2	2		1
Campanulinidae						1						1	1		1		1			1	1		2									2	1	1												1
Campichoetidae	1	1	3	1	2	2		3	1	3	3	3				1	4	2		2	1		2	2				3			4	2		4		1			1				1		2	2		3
Campodeidae			18	5	4	4		13		7	12	7			7	3	46	2	14	69			12		14		8	18	4	3	5	1		41	14	11							2			1		11	2
Campydoridae								1									1											1			2			1								1			1			1
Canacidae					1						1	1				2	2			1			2						1	1		2		1											1				1
Candonidae	2	1	38	2	30	6	18	20		23	63	3		1	2	2	20	14	2	41			33	5	1			10	3	8	37	15	3	31	1				6				41		17	19		57	2
Canestriniidae
Canidae		3	4	2	2	4	3	1	1	4	2	2		3			2	4	1	3		1	1	1	1			3		4	4	1	1	3	1	1	1	3	1	3		3	4		1	4	1	3
Cantacaderidae
Cantharidae	1	31	107	31	58	39	24	58	19	88	87	18		23		12	109	23	16	105			40		21		5	87	8	16	61	28		139	21	25		23	24		1		6	5	10	11		58
Canthocamptidae		12	36		15	58		32		34	42	6		9	1		17	20	4	69			28		10			19	5	11	10	9	7	66	10	7	2			1			22		6	14	1	26	2
Canthyloscelidae								1		1	1							3																												2		1
Canuellidae						1					1								1	3			1									1	1	3												2
Capillariidae		2	9		13	34	13	5		3	26	6		14	10		43	4	4	26	1		30		1			1			19	2	3	33	1	2		14		15		10			10	4		55	4
Capniidae	2		5	2	3	4		5		6	6	1		1			10	4	1	8			3	1	1			2		1	2	2	1	5	1	2		1	2	6			6			5		5
Caprimulgidae	1	1	1	1	1	1	1	1	1	1	2	3	1	1	2	2	2	1	1	2	1	2	4	1	1	1	1	1	1	1	1	1	2	3	1	1		1	1	1		1	1	3	1	1		1	2
Capsalidae						1				1																					1																	1
Carabidae	69	438	658	628	406	744	331	509	245	514	568	329	25	321	209	231	1100	290	287	1010	3	13	372	176	382	76	149	747	157	611	583	219	31	1173	382	409	331	255	307	332		519	393	121	381	266	2	535	56
Caraboacaridae											1																				1											1						1
Carabodidae			13	1	1	11		4		10	15	6				2	28	10		8			7					3			18			23											4	7		11
Carabonematidae											1
Carcharodopharyngidae			1								1						1	1																1														1
Cardinalidae																	1			1	1		1									2	1											1		3
Carnidae			9					18		20	10		1			1	20	10		1			12					2		3	18		1	1								1			1
Carphaniidae																																		1
Carpoglyphidae
Carposinidae			2			1			2	2	1					3	1											1		1	2			1				1					2					1
Carychiidae	2	2	4	4	2	2	1	2		2	2	2		2	1		6	2	1	4	2		2	2	1			4	1	10	2	2		13	1	1	2	2	2	2		2		1	2	2		2	3
Caryophyllaeidae		2	3			6		1		5	3	1					3	1		1			6					2			6	1		5				4		3						1		7
Castniidae															1		1			1														1		1
Castoridae			2		1		1	1		1	1	1		1				2		1										1	1							1		1					1	1		1
Catacanderidae
Catenotaeniidae						5	3	1		5	2	1			3		6	1	3	2			3								4	1		1		2		2										4
Catenulidae			4							1	6						2	3		2			1									1		5											1			4
Cathaemasiidae			1			1					1												2								1			1														1
Caudiferidae
Cecidomyiidae	30	7	259		131	105		234	9	498	838	73		54	24	3	221	140	1	505			618		12			66		6	338	83		318	12	51	1	237	1	361		3	2		335	89		418
Celaenopsidae
Centrarchidae			2		2	1	2	2	1	2	1				2		2		3	3			3		2	1	1	1	1		2			2	2	2		2		2		1			2			2
Centropagidae														1		1		1		1														2						1						2		1
Centrorhynchidae			7			13				4	5				2		4			4			2								5			7				1				5			1			3
Cephalobidae			14		11	1		1		23	15			12	6		45	1		1					3						41			22	3	6		13		4		9			24		2	32
Cephalochlamydidae																							1
Cephalogonimidae		1				1				1	2	1					2			2								1			1			1				1								1		1
Cepheidae			12			6		4		3	6	2				2	8	5		6			8					1			9			12											3	3		11
Cephidae
Cerambycidae	19	127	204	214	118	236	150	177	57	199	176	73		96	42	26	259	86	74	237			63	7	71	3	14	309	63	225	210	19	1	259	71	113	76	116	74	115	1	134	166	26	87	96		188	6
Ceraphronidae			3		2	3		17			14	37					9	5		9			17		1			6		4	18		2	20	1		1		1			9			2	2		1
Ceratocombidae			1	1	1	1	3	1		2	2	1		1			1	3		1			1					1			1	1		1					1	1			1		1	1		3
Ceratophyllidae	11	2	18	4	22	11	1	32	2	22	33	20	20	5	5	4	27	16	14	34	6	1	27	1	5	1	1	23	1	5	23	21	5	25	5	7	2	5	17	4	2	2	7	5	19	20	1	28	5
Ceratopogonidae	37	20	101	15	151	36	42	81	25	175	256	95	4	184	5	26	164	61	60	241	14	1	169	43	44		16	10	7	29	129	78	4	92	44	21		129	7	30		7	5	1	60	89		211	10
Ceratozetidae			32			9	1	13		16	14	8					44	13		5			20					5			17			26											10	15	1	32	1
Cercomegistidae
Cercopagidae			1		1	1		1			1	2		1				2		1			2	2								2		1				3		2					1	1		1
Cercopidae		3	4		3	4		3		3	4						4			6			1					6		3	3			5		3						2			2	1		2
Cercopithecidae																						1
Cerococcidae						1			1	1	1						1		1	4					1			1		2	1			1	1							1			1			4
Cerophytidae			1		1			1		1	1									1			1		1						1			1	1				1						1			1
Certhiidae	2	2	2	2	2	2	1	2	1	2	2	2	1	1	2		2	1	1	2	2	1	1	1			1	2	1	2	2	1		2		1		2	2	1		1	2		2	1		2
Cervidae		1	5	3	3	3	4	3	1	6	4	4		3			3	6	1	5			6	3	2		1	2		5	3	3	1	3	2	1	2	4	3	3		5	2		3	5	1	5
Cerylidae									1														1					1					1												1			1	1
Cerylonidae		1	6	2	2	6	2	2		7	6	3		2			2	2	3	7			5					3		4	7	2		7				3		2			2		3	2		6
Cetoniidae	5	18	15	17	11	22	12	17	10	16	15	7		6	6	3	22	5	12	21	4	1	6		13	8	9	24	13	17	15	1		25	13	17	4	10	10	10		5	16	5	13	6		15
Chabertiidae		4			3	4	1				4	4		5			6			3			5		1						2		2	7	1	2		4							3			7	4
Chaetodactylidae
Chaetonotidae			15		5	21		29	1	4	73	26		6	1		4	2	1	33			48	1	27			2		1	27		1	76	27			1								4		86
Chalcididae		2	15	9	1	9		6	3	31	24				7	8	41	3	6	32			8		2			7		32	43			37	2	3		1				17	11			2		5
Chamaeleonidae									1								1					1						1	1							1								1
Chamaemyiidae	5		16	10	1	27	5	31		19	22	10		4	6	9	28	21		26		1	31	1	5			2		12	34	5	1	37	5	3		8				14	12		20	6		22	2
Chamaesomatidae																	13			11														1					1
Chambersiellidae			1								1									1														1								1						1
Chamobatidae			11	1		5		2		6	7	4					15	4		3			10								10			7											4	3		10
Chaoboridae			1		5			1		4	7	6					2	6	3	3			6		2			3			4	1		4	2			6		1					5	7		4
Chappuisiidae										2	2	1																			1
Chapuisididae
Charadriidae	4	7	10	7	10	11	6	9	10	10	13	11	6	7	7	10	12	11	7	14	7	7	15	6	7	6	7	13	7	7	12	11	7	13	7	7		7	7	7		6	7	13	12	14		11	8
Charinidae																											1
Charopidae
Cheiridiidae			2		1	2		2		2	2	1		2		1	1	2		2	1		1	1	1			1		1	1	1		2	1					1					1	1		2
Cheliferidae		2	5	5	2	6		5	4	3	3	2			6	10	14	2	4	10	1		2		11	4	3	11	4	6	4	1	1	10	11	6				1			3	2	2	1		3
Chelodesmidae											1	1					1
Cheloniidae		1		1	2	1			2		1	1			1	1	2		2	3	3		3	2	2	1	1	2	1	1		3	1	2	2	2								2	2				1
Chernetidae		2	15	4	9	12		7	1	13	16	10			9	4	17	9	6	14			11	4	11	1	3	9	3	5	10	6		18	11	9			2	6		1	2	3	7	9		13	1
Cheylabididae
Cheyletidae
Chimabachidae		2	3	1	3	2	2	3		3	3	3		3			2	3	1	3	1		3	3						2	3	3		3				3	3	3		3	1		3	2		3
Chirocephalidae		1	4	2	2	2	3	1		4	2	1		1			2		1	4			1		1			2	1	2	5			5	1	1		1					2		2			4
Chirodiscidae
Chironomidae	24	36	584	24	370	199	77	387	9	284	745	340	75	196	61	58	484	724	317	661			590	334	31	5	32	58	30	75	348	462	68	511	31	41	3	153	149	77		75	96		482	537	62	444	41
Chiropteromyzidae								1										2					1								1														1
Chloroperlidae	3	1	7	5	3	7	1	6		10	9	2		1			7	4	1	7			2	2	1			3		1	8	2		5	1	1		3	1	3			7		5	2		8
Chloropidae	1	29	175	45	117	154	87	135	18	166	207	109	4	138		31	98	137	19	175		1	176		38	5	4	44	11	61	203	62	1	199	38	45		107	3	114		47	50	23	138	70		175	12
Choanolaimidae			1								1	1		1																				1											1			1
Chondrinidae	8	6	5	4	2	3		9	2	3	4				2	1	42		2	29		2	2		5	3	3	6	3	7	2			18	5	7	3		2				3	2				2
Chordeumatidae		1	7	1	6	1		7		4	6	1					1			20	2		5	3				1		1	3	3		2					4				1		4	1		2
Chordodidae			8	4	6	5		3		6	20						5	1	2	6	1		6	2	2					6		1		9	2	1												7
Choreutidae		5	10	6	4	3	3	8	2	8	9	6		8	1	2	7	9	4	11	3	3	6	2	5		2	6	2	7	8	4		10	5	7		5	3	8			5	2	4	4		6	1
Chortoglyphidae
Chromadoridae			3							2	5			2																	6									1					4			4
Chronogastridae			2		1			1		1	2	1					2						1		1						2			1	1	1									3			3
Chrysididae		53	107	11	35	57	21	115	83	76	85	28		29	24	24	188	30	63	166			25		67	1	74	174	58	68	113			147	67	78		31	18	21	1	39	25	6	51	22	2	56	2
Chrysomelidae	110	320	571	451	360	572	266	502	144	490	540	287	5	231	164	115	769	257	261	773	11	41	278	43	276	86	122	472	152	477	536	102	10	806	276	364	209	242	284	317	51	200	323	117	348	209	4	492	28
Chrysopidae	4	8	30	7	15	23	6	34	4	25	28	16		8		7	45	14	7	46			23		17			26	3	20	31	7		39	17	19	15	8	9	12		14	6	11	16	14		27	2
Chthoniidae	1	2	17	12	4	9		9	1	11	15	2			10	15	30	1	10	23	3		6	2	21	2	3	21	9	26	7	4		60	21	13						1	17	6	2	2		5	3
Chyromyidae			4			3		7	12	9	4	1			7	16	26			11	1		10		5			8	4		7	3		8	5	10								14				4	2
Chyzeriidae
Cicadellidae	5	96	409	6	239	324	6	353	79	398	441	231		207	22	80	234	243	27	526	2	1	272		143	5	8	321	18	36	280	108	4	471	143	214	2	211	1	238		191	2	1	267	216		357	11
Cicadidae		3	2			3		3	3	2	2				1		4		2	3					2	1	2	6	1	1	2			3	2	3					1	1						1
Cichlidae					1				1	1					1		1		1	1			1																					1
Ciconiidae	2	2	2	2	2	2	2	2	2	2	2	2		2	1	2	3	2	1	2	2	2	2		2	2	2	2	2	2	2	2	2	2	2	2		2	2	2		2	2	2	2	2		2	2
Ciidae		2	41	29	17	7	26	25	4	34	43	24		9	1	5	16	30	17	44		2	22	4	17			18		31	33	10		44	17	21	7	11	1	10			2	1	19	29		33	1
Cimbicidae		4	22	4	16	14	2	18	1	22	21	9		21	1	1	12	29	1	21			17					6	1	17	17	10		22		3			5	14			10		14	2		14
Cimeliidae																	1		1	1								1	1	1				1
Cimicidae		2	4	1	3	3	2	3		3	5	3	1	2			4	3		3			4					2		2	2	3	1	3					3	1		1	2	1	5	2		4	1
Cinclidae	1	1	1	1	1	1	1	1	1	1	1	1	1	1			1	1	1	1		1	1	1				1		1	1	1	1	1		1		1	1	1		1	1	1	1	1		1
Cirolanidae						2									1		1			2							1			1				1		1
Cisticolidae		1	1		1	1		1	2		1				1	1	1		1	1	1	1	1		1	1	1	1	1	1		1		1	1	1								1	1
Cithaeronidae																												1
Citharidae
Cixiidae		9	23	3	13	22	2	17	13	21	19	7		5	2	16	24	6	7	34	1		14		11	2	3	30	4	6	21	5		37	11	13		5		6		5	2	2	9	6		15	8
Cladonematidae												1	1						1	1			1	1																						1	1
Cladonychiidae
Cladorchiidae		1	1			2	1	1		2	3	1					2			3								1			2			4				2								1	1	2
Clambidae		1	12	7	8	4	2	12		7	13	6		2		2	8	4	2	13			9		4			6		6	7	6		16	4	3	5	5		3					7	6		8
Clausiliidae	5	46	35	27	12	43	9	20	8	26	27	11		13	1		13	8	4	28	2	1	8	4	2	6	12	124	36	63	28	4	1	49	2	19	12	13	12	13		9	26	4	9	10		25	2
Clavidae					1						2	1						1					1							1				2											1
Cleridae		5	16	2		6		8	8	12	13	6			4	3	24	3	5	20			4		6		3	18	9	8	11			17	6	6								3		4		2
Cletodidae		1				2					3						1	1	1	3			1					1		1	2			2		1										1		1
Clinostomidae		1				2				2	2									1											2			2				1				1						2
Cloacaridae
Clubionidae	4		27		23	25	17	25		26	30	20		17	3	4	19	17	9	29	4		22	11	1		1	11	3	17	22	14		30	1	3	19	17		14		12	9	1	23	18		26	3
Clupeidae					1	5					1	2		1	2	1	2	1	2	2	1	1	1		1	3	3	3	3			2		1	1	1					1			1	1	1
Clusiidae	2		7		7	2		10	1	11	8	11					5	10		7			10	3							8	5		4		1				4					7	9		9
Cnemospathididae
Cobitidae		1	2	2	2	6	1	2		3	2	2		2	5		5	1	2	2			1		4	8	8	8	8	2	2			4	4	4	1	2	1	2		1	2		2	1		3
Coccidae		1	16		4	24	8	31	9	32	39	19		3		18	29	3	10	70	9		30		18	1		23	36	15	46	4		55	18	9		2	1	17		15	7	12	35	1		41	8
Coccinellidae	13	47	84	57	64	82	48	62	17	80	74	52	1	35	43	36	106	58	61	116	1		49	6	65	4	7	89	25	70	78	18	1	119	65	73	22	40	48	35	4	19	31	31	56	51		71	15
Coccyzidae
Cochlicellidae		2			2	1			2						3	24	3		3	3	1	1	2	1	3	1	2	2	2	2		1		3	3	3								2	2				1
Cochlicopidae	2	2	4	1	3	3	4	4		4	4	4	1	2		1	2	3	1	4	2		3	2	2			1		2	4	3	2	2	2	2	2	3	4	3		4	1		3	3		4	2
Cochlostomatidae	1	12	7	6				1			1						9			14					1			10	1	14				16	1	4							1
Coelogynoporidae											1		2
Coelopidae					2						3	3	2	2	1	1	3	1	1	3			3							1		3	2					2		1				1	2	3	1	3	1
Coenagrionidae		11	16		15	14	13	15	2	11	18	11		12	5	1	12	12	10	16	6		12	7	9	2	5	10	7	15	13	7		16	9	11	6	12	12	12		8	11	1	16	10		15	2
Coenomyiidae			1		1			1		1	1						1			1											1			1														1
Coleophoridae	5	40	195	5	102	75		119	20	172	177	119	2	104	6	20	253	112	22	273	40	6	107	12	67		6	123	34	119	196	52	2	240	67	50	14	104	29	129			81	10	103	103		151	1
Collohmanniidae			1
Collothecidae
Collyriclidae						1		1		1							1			1														1								1			1			1
Colubridae	5	11	4	10	2	11	2	6	6	4	4	2		2	4		12	2	2	8		8	2		4	7	9	11	5	10	4			14	4	10	2	2	2	2		7	11	3	2	2		3
Columbidae	5	5	6	5	5	5	5	5	5	5	6	6	5	5	6	7	6	6	4	6	5	5	7	5	4	4	4	7	4	5	6	5	5	7	4	5		5	5	5		5	5	5	5	6		5	3
Coniopterygidae	7		20		2	21	1	16		14	19	10		4	4	11	38	8	3	21		2	11		8			16		18	24	3		23	8	3	8	3		6		6	1	3	7	9		12
Conocephalidae		3	3	3	2	4	2	3	2	3	3	1		1	2	2	5	1	4	4	2		3		3	1	1	7	3	3	3	1		4	3	3	1	1	2	1		1	3	1	2	1		2	2
Conochilidae
Conopidae	6	4	43		35	18		44	7	50	52	26			3	3	47	14	4	57			24	4	6		3	1	3	4	52	11		61	6	31		16	2			1			33	11		49
Convolutidae			1								1									1																									1			2
Coptopsyllidae
Coraciidae		1	1	1		1	1		1	1	1	1		1	1	1	1	1	1	1		1	1		1	1	1	1	1	1	1			1	1	1		1		1		1	1	1				1
Corbiculidae			1			1		1			1						1			1			1																1						1			1
Cordulegastridae		2	3	1	2	4	1	2		2	2	1		1			2	1		2	1		1			2		5		3	3			3		2	2	1	2	1		1	2		1	1		2
Corduliidae		3	6		6	5	5	7		6	7	5		5			2	7		7	1		4					3		5	5	2		8			3	5	4	5		1	2		6	7		6
Coreidae	5	21	21	25	15	33	11	27	19	19	19	8		7		17	36	6		33	1		11					38	1	28	25	1		37			5	8	12	5		16	31	11	12	6		15
Corinnidae	1		5		3	5	1	4		5	5	2		2	2	4	14	1	5	8			3	1	5		1	3	1	2	5	1		11	5	2	2	2		1		1	5		2	2		3	1
Corioxenidae											1
Corixidae	2	11	27	18	34	26	20	24	4	31	35	31	2	26	1	5	37	29	3	35			38		3			18	1	22	22	31	1	29	3	2	18	15	14	15		17	18	3	33	30		34	1
Corophiidae			1	1	3	3					3	3		1	1		1	1	1	3	1		3	2	1						1	2		1	1	1		1		1		1			1			1
Corvidae	8	9	10	8	8	8	8	10	5	9	10	8	4	8	6	4	11	9	5	12	7	7	9	9	4	4	4	9	6	8	9	10	4	10	4	7		7	8	8		7	9	5	10	9		9	4
Corylophidae		3	13	11	8	7	1	16	3	5	14	3			9	8	16	5	13	24	2	1	10		15		1	16	3	15	20	3		27	15	16				3				3	2	2		5	2
Corymorphidae											1	2						1	1	1			2									1	2	1											1	2
Corynidae											2							1		1			1	1									1												1	1
Cosmocercidae		1				2	4				1						9			1			2		2			3			3			4	2			2										7	1
Cosmochthoniidae			2			1		1									15	1		3			1					4			1			4											1			1
Cosmopterigidae	2	10	24	5	7	15	8	20	11	22	19	10		12	3	17	47	10	17	40	3	4	15	1	15			33	13	28	23	7		38	15	17		9	1	14		8	17	13	9	6		17	2
Cossidae	4	5	6	5	3	8	4	5	3	5	5	3		4	1	3	9	4	2	8	2	1	3		3	3	7	10	6	5	7	1		7	3	6	1	4	2	4			6	1	3	3		4
Cottidae			1	1	1	1	2	1		2	1	1		2	1		1	3	2	2			1		1					1	1			1	1	1		3		3		2			1	3		2
Crabronidae	54	82	275	11	172	285	64	227	144	177	242	121		53	55	53	369	146	120	344	57	11	118		117	9	111	251	72	159	270	42		326	117	143		10	103	105		4	31	40	152	99		206	5
Crambidae	4	99	193	142	111	196	60	177	12	150	168	122	9	120	40	54	245	119	99	264	73	28	118	3	112			196	75	173	169	60	4	252	112	136	37	106	82	114		33	157	48	108	101		153	16
Crangonyctidae					1						2									1			1	1								1
Craspedosomatidae			22	6	2	1	1	24		5	13	2						1		29			2	2	1			1		13	3	2		121	1			1	1	1	1				1	2		4
Crenosomatidae			2			5	2				2	1			2		6						3								1			5														4	1
Criconematidae			16		31	1		6	3	11	15	2		2			34			5			4					1		1	24	1		34		1		4		1		5			31	1	1	31
Criodrilidae		2	1	1		1	1	1		1	1						1			1								1		1	1			1		1		1		1		1	2					1
Cristatellidae			1		1	1	1	1		1	1	1		1			1	1		1			1	1							1	1	1	1					1	1					1	1		1
Crowsoniellidae																																		1
Cryptochetidae											1						2			1									1					1
Cryptognathidae
Cryptogonimidae											1
Cryptophagidae	6	17	123	84	81	46	62	107	3	108	131	92		79	2	27	87	113	9	117		1	105		17			54		72	94	48	13	133	17	23	13	63	3	75		43	14	13	88	94		114	6
Cryptopidae		5	4	4	3	5		3	2	2	3	1			1	4	7	2	1	6	2		3	1	3	2	5	10	4	6	1	1		12	3	3					2		3	1	3	2		2	1
Ctenacaridae																	4																	1
Ctenidae					2
Ctenizidae																	1		1						2	2	1	2	2					2	2	2
Ctenobelbidae			3	1		1										1	6						2					1			4			3														1
Ctenophthalmidae	6	1	15	5	9	11		16	1	11	17	10	10		4	1	15	5	3	24	4	1	10		3			16	1	5	17	4	1	25	3	5			3				6	1	9	7		19	1
Cucujidae			4					4		4	1	2		4		1	2	1		4		1									4			2						1	2							4
Cuculidae	1	2	2	1	3	2	1	2	3	1	3	4	1	1	3	2	2	3	1	3	1	2	4	1	2	2	2	2	2	2	1	4	3	4	2	1		1	1	1		2	2	1	2	3		2	3
Cucullanidae					1	2				2	4	3					2	2		2			4		1						2	1		3	1			2		3					1	1		4
Culicidae		36	38	8	25	43	24	28	8	42	46	33		32	6	11	53	39	47	58	4		29	10	40			46		45	43	17		60	40	41		36	15	25	3	12	23	8	24	38	1	47	3
Cunaxidae
Curculionidae	66	281	967	573	406	910	193	683	186	777	855	459	14	335	176	356	1253	363	382	1294	14	57	465	90	438	48	95	834	131	727	919	162	17	1551	438	626	46	219	106	333	39	407	289	93	461	333	9	836	53
Curtonotidae		1	1							1							1			1											1			1														1
Cushmanideidae																																													1
Cyaneidae																							1
Cyathocotylidae						2		1		5	4						2	1		2			3								3			1				1		1		1						8
Cyatholaimidae					1						1																							1											1			1
Cybaeidae			4	1	1	3	1	4	1	2	3	1		1			2	1		4			1	1				1		4	2	1		7			2	1		1		1	3		1	1		3
Cybocephalidae		3	5	3	1	2	2	2	4	3	4	1		1	1	8	8	1	2	9					3	1	1	3	5	5	4			5	3	2				1	1		2		1	1		2
Cyclocoelidae			1			6				3	10						5			3			3								4		1	12								3						3
Cyclophoridae		1		1												1												3		1																			1
Cyclopidae		24	53	15	30	40	4	42		39	63	10	1	36	20	1	37	40	13	71		1	48	1	33		2	44	16	30	40	7	13	82	33	23		10	11	20			42		18	33	2	44	11
Cyclopinidae											1
Cydnidae	1	18	17	20	14	25	6	14	13	16	15	6		4		18	37	5		32			7		1			29		23	20	1		33	1	1	8	9	8	6		15	21	11	10	5		13	1
Cylindrocorporidae			1			1		2			3												1											2				1										1
Cylindrotomidae			4		1		2	4		4	4	4		4				5		2			4							1	2	3		2				4	2						4	2		4
Cylisticidae		1	1	1	1			1		1	1	1		1	1		2	1	5	3			1	1	1		1	1			1	1		22	1			1		1					1	1		1
Cymbaeremaeidae			3			1		1		2	2	1				1	3	1		3			1					1			2			3											1	2		2
Cynipidae	68	3	134	21	23	71	1	13		37	112	41			1		130	21	8	133			90		1		1	56		47	132	28		108	1	25						42	13		49	20		87
Cyphoderidae		2	2	1	1	2		2			1					1	3	1	1	6			2				1		2	2	2	1		2		2				1					1	1	1	2	1
Cyprididae	1		25	3	31	21	18	20	2	25	47	1			12	20	48	7		51	1		39	8	33	1		6	4	5	40	16	8	57	33	1			18			1	31		14	21	1	46	12
Cyprinidae		25	32	26	19	36	23	24	7	31	30	15		19	32		32	18	30	30		3	16		34	37	37	37	37	37	32	9		34	34	34	8	25	7	23	1	32	15	4	22	14		26
Cyprinodontidae		2		1					1						2		2		2	2					1	1	1	1	1	1				1	1	1
Cyrtaucheniidae																	1												1					2		3
Cystidicolidae			1			2		1		2	3						4	3		3			4								1	2						2		3					1	4		6
Cystoopsidae						1																									1
Cytherideidae			1		1			1			2				1	1	1	3		2			2								1	1	2	1									1		1	2		2
Cytheruridae					1						1							2																											1	1		1
Cyzicidae			1							1							2			1					1						2				1	1								1				1
Dacelonidae																											1
Dactylogyridae		22	23			56	33			64	47	1					24	26		27	1		21					24			41	2		12				48		50					1	23		52
Dactylopiidae																1																				1
Daesiidae									1								1											4						2
Dalyelliidae			22			5		15		9	36	6	5	6			18	38		15			10								4	7	9	27						3			3		7	1		37
Damaeidae			13			6		4		6	10	7					20	11		3			8					1			9			13								1			6	2		17
Damaeolidae			2			1											4											4			2			4														2
Dampfiellidae																	1
Daniconematidae										1		1											1								1																	1
Daphniidae	8	5	19	1	23	9		20	2	24	35	17	7	4	7		24	22	2	26			27	12	12			18		1	18	12	10	29	12	9		23		22		13	7		23	22	2	26	1
Darcythompsoniidae						1					2							2					1					1		1				1														1
Darwinulidae			1		1		1	1			1				1		1	1		3			2	1	1						1	2		1	1				1				1			1		1
Dascillidae	1	1	1	1	1		1	1		1	1	1		1			1	1		2			1	1				1		1	1	1		2		1	1	1	1	1					1	1		1
Dasydytidae		1	2			2		8		1	14	1								2			4		4						5			6	4													8
Dasytidae	11	17	26	22	10	28		31	16	20	22	10		13	8	12	108	9	32	57			8		31	9	15	85	18	39	25	2		81	31	34		11	3	9		3	12	9	10	11		10
Davaineidae		6	7			20	6	4		13	11	3				2	19	3		17			10		2			1			2			21	2					3		11			1	4		7	1
Delphacidae	2	15	92	28	53	76	2	65	19	87	104	55		61	1	14	61	58	17	118	2		74		21	12	6	109	24	21	75	36	1	93	21	29		46	1	60		26	10		68	37		83	6
Demodicidae
Dendrocoelidae		1	5	4	4	2	1	4		6	9	3		1			2	2		22			2					2		1	3			7					2				19		2			4
Dendrocygnidae															1	1	2			1
Derbidae				1		1			1											1								1						2		1
Dermanyssidae
Dermationidae					3	1					3							1		3			5											5											3			1
Dermestidae	12	28	45	40	26	57	30	33	22	53	61	36	1	20	5	28	94	36	19	81	5	1	39	11	37	7	7	75	15	47	51	17	5	78	37	30	9	28	13	31	4	20	34	25	31	25		46	1
Dermochelyidae		1		1	1				1		1	1	1		1	1	1		1	1	1		1	1	1	1	1	1	1	1		1	1	1	1	1					1			1	1	1			1
Dermoglyphidae											1									2			1											3											1			1
Derodontidae			2		1			1			2	1					1			1										1				2
Derogenidae						2				2	2	3					3			1			1								1			1											1	1		1
Desmidocercidae						2														1											1			1						1		1			1			1
Desmodoridae			1							1	3						2														3			3		1									2			3
Desmoscolecidae			2		1			3			1																						1
Diadocidiidae	1		3		2	3		4		5	3	2		3			1	5	1	3	1		3					4	1	2	3	2		3		1				2			1		2	4		3
Diaphanocephalidae						1											2			1														2														1
Diapriidae	4		106	1	8	1		80		154	275	275		2	1		15	125	9	123		2	270		2			6	2	4	93	102	6	97	2	3	1	1	6			77			12	46		29
Diaptomidae		7	15	3	3	23	2	8		5	16	4		9	5	1	17	8	7	17			8		8			12	3	22	20	5	4	19	8	4	1	2		6		2	21		3	6		18	1
Diaspididae		5	26		25	35	1	42	28	1	69	14		1	16	56	84	6	20	88	5	3	28	2	31			63	8	5	46			103	31	44		1	3	2	4	5	2	42	20	12		33	15
Diastatidae	1		4		4	3		6		8	8	6					2	6		4			6	2				1			6	4		6				2					1		5	4		5
Dichaeturidae											1												3		1										1
Dichelesthiidae											1												1									1
Diclybothriidae
Dicranolasmatidae
Dicranophoridae
Dicrocoeliidae		1	4			30	1	3		13	10	1			2	1	5		1	9			8								4	1		11		1		1		1		9			1	1		16
Dictynidae	4		20		16	15	10	16		22	25	11		12	2	9	21	18	5	34	3		17	3	3	4	6	16		17	22	5	1	30	3	3	6	7	3	5		10	10	4	14	8		19	4
Dictyocaulidae		3				1	3				4	2		3			4	1		2			4		1						2			4	1			2		1					2			4
Dictyopharidae		2	2		1	9		1	4		1	1			1	2	25		2	5					6			18		1	3			7	6	5					1	2						1
Dicyrtomidae		1	4		1	2	3	3		2	8	2			1		4	5	1	6			4		2		1		2		2	3	2	6	2	2								1		3		9	4
Digamasellidae
Dignathodontidae		3	3	4	1	3		2	3	2	2				2	2	4		3	5			2		5	1	2	6	4	5	3	1		8	5	4			2		3		1	3	1			1
Dilaridae	1	1		1		1											6		1	2					1			1		1				2	1								1
Dilepididae		8	5		6	64	14	9		54	41	7	2	8		10	29	3		44			33		1			5			38		27	38	1			5		7		35			2	1	3	46
Dinidoridae
Dioctophymatidae		1	2			4				1	3	1					2	1		2			2								1			7				1		1		1			2	1		4
Dioecocestidae			1					1			1			1			1																	1														1
Diomedeidae											1	1	1			1	1			2			1									1	1			1										2
Diopsidae																															1
Diphtherophoridae			1		2	4				4	2			1			1														4			3						1		1			5			11
Diphyllobothriidae		2	2			6	2	2		2	11			2			3	6		4			8		1			1			1	5	3	6	1			7		4					1	5	2	9
Diplectanidae
Diplodiscidae		1	1		1	1	1	1		1	1	1					1			1			1					1			1	1		1				1		1			1		1			1
Diplogasteroididae			10			2				2	15	1					1			1											3			5			1					1			1			1
Diplogastridae			9		1	1		1		5	23	1		1			4						3		2						9			12	2	2		2		1					9			14
Diplogyniidae
Diplomaragnidae
Diplopeltidae			2		2	1		1		2	3			1			3						1		1						5			2	1	1		1							3			2
Diploscapteridae			2							1	2			1			1														1			1				1										1
Diplostomidae		4	9			25	5	17		16	24	3		2		1	4	6	1	9			18					2			14	11	1	13				19		11		10			5	4		25
Diplotriaenidae						8					2						7			6			3											7				1		3		1			3			9
Diplozoidae		3	6			13	2			14	8						3	2		5			1	1				1			10	1		3				10		6						5		10
Dipodidae			1			1	1			1	1	1		1				1													1							1		1		1				1		2
Diprionidae		1	16	1	14	4	1	16		15	16	9		16	1		2	17		13			9		1					9	11	3		16	1		1		2	11					13	6		15
Dipsocoridae		3	3	1	1	4		2		3	3	2		2			2	2		6			2					3			3	2		4					2				2		1	2		4
Diptilomiopidae			3	2	1	9			1		10	5					5	12					4					2		4	18			14		1				1			1					21
Dipylidiidae			1			2	1				2	1		1	2	2	10		1	2			1					4			2		1	5														1
Discocotylidae							1											1					1									1														1
Discoglossidae																	2		2	2														2		2								2
Discolaimidae										2				1			13														6			8		3		1							7			3
Ditomyiidae			1		3	2	1	3		3	4	2		2			2	1		3			3					1		1	3	1		3				1		2					2			3
Dixidae	3		4		12			9			16	15		1		1	7	7	7	18			15		9			12			9	12		10	9	3		9							14	5		21
Doderiidae
Dolichocybidae											2																							1														2
Dolichodoridae																																		2
Dolichopodidae	4	5	333	5	297	85	67	215	1	312	364	196	1	140	7	47	179	234	56	381	3	1	284		2		3	68	25	16	269	149	4	253	2	16		3	24	5		4	2	1	243	216		277	17
Dorydrilidae			1					2			2									1			1											1
Dorylaimidae			28		9	1		15		14	28			4			42			6			1		2					2	41			23	2	8		6	1			5			23			25
Dorypetalidae		1		2		1											2											1			1												1
Douglasiidae		1	8	1	4	1	2	4	2	5	6	3		4			5	4		5		1	2				3	3	2	3	4			7		1		4		4			4		3	3		5
Dracunculidae						1											1																	2
Dreissenidae		2	1		2	1		1		1	2	1		1			2	1		2			2					1			1	1		1				1	1	1			2		2			1
Drepanidae	9	6	17	11	16	13	14	17		16	16	16		12	2		17	13	7	18	10	3	16	8	4	1		14	3	12	17	9		18	4	7	9	13	16	14			13		16	15		16
Drilidae			2	1	1	1	1	1	3	1	2						3		1	3					1			5	3	3	1			2	1	1								1				1
Drilonematidae																				1											1
Drosophilidae	16	5	67	30	38	25	19	68	9	79	62	37	3	2	6	28	42	60	8	53	4	1	54	12	10	1	8	28	10	36	69	16	4	50	10	14	1	11		8		7	17	14	42	40		52	18
Dryinidae		2	33	2	25	14		28	7	27	36	25		2	8	21	53	30	21	65		1	33		13		7	24	4	9	42	19		59	13	12		2	4	2			3	2	36	26		20	4
Dryomyzidae	1		3		3			3		3	3					1	2	4		2			3		1			1			2	2		2	1			2							1			3
Dryophthoridae	1	2	8			7	3	6	5	5	4	4		3	1	2	5	4	5	8	1	4	5		9	1		2	1	4	6		2	10	9	9		2		3				4	5	3		7
Dryopidae		1	12	5	3	8	4	9		12	12	6		5	3	2	14	5	8	15			7	2	7			16	5	10	10	3		17	7	9		5	6	6				1	10	5		11	1
Dugesiidae			4		3	2		3		1	4	2			5		6	1	4	4					8	2	1	3	3		1	1		9	8	3		1	1	1					3			4
Dynastidae		4	2	5	1	4	1	1	8	2	1	1		1	3	2	6	1	4	7	1				5	3	3	5	5	5	2			4	5	4		1		1		1	4	3	1	1		1
Dysderidae	4	6	11	14	4	33		10	6	8	6	3			6	46	54		12	27	3		5	3	12	7	10	45	16	33	12	3		60	12	16	4	1	2			7	14	4	3			5	1
Dytiscidae	9	38	129	93	110	110	115	120	27	118	145	120	7	107	51	22	152	137	74	173	49	1	114	74	84	18	12	92	35	115	102	76	6	169	84	89	32	90	66	100		31	62	13	108	130		138	6
Echimyopodidae
Echiniscidae	2		30		1	11		24		11	14	3	6			2	20	6	6	19	4		22		11			18	8	21	24	8	14	51	11	13									1	18	17	24	4
Echinophthiriidae											1							1
Echinorhynchidae		5	7	5	2	8	5	3		5	9	4		1			4	7		7	1		7		1			6			3	4		10	1			5		7					3	6		10
Echinostomatidae		6	6		1	50	10	3		21	59	1		1		2	11	4	1	11			31		1						34	2	5	30	1			9		1		24			3	3		44
Ecnomidae		1	1		2	1	1	1		1	2	1		1	1		2	1		2	1		1		1			1		1	1	1		1	1	1		1	1	1			1		1	1		1
Ecphyadophoridae			1		2			1		2	2			1			1														1			1				1							2		1	3
Ectinosomatidae		1				2					3	1						2	1	6			2							2	1	2	1	5									1		1	2	3	2
Ectopsocidae			1		2			7	3		4					3	5	1		4			7	1				2		3	4	4		7					2	1				2	1	1		1	4
Eirenidae					1						1	1											1									1													1
Ektaphelenchidae											10												3
Elachistidae	3	37	220	22	100	52	41	171	11	173	178	112	1	106	12	19	164	119	32	216	43	13	111	34	55	8	9	90	21	54	157	66		218	55	54	7	83	44	115		8	76	12	95	102		146
Elaphonematidae			1														1														1											1
Elateridae	3	49	163	87	95	170	75	130	29	158	151	70	2	68	22	37	216	62	50	213			67	15	40	5	6	189	22	112	175	22	1	228	40	66	47	65	62	77		75	63	6	72	67		137	5
Elenchidae					1					1	1	1				1		1		1			1	1							1	1														1		1
Eleutheriidae														1					1	1			1	1																						1
Elipsocidae			9		9	2		12	8		12	4				4	15	7		14			8					9		2	6	6		9					7	5					6	7		10	2
Ellobiidae		1			3	1					1	1			4	5	5		3	5	1		2	2	3			1		2		2		3	3	3								3	3				6
Elmidae	3	5	19	17	17	17	8	18		20	23	5		6	1		29	6	7	30			12	4	9	4	2	21		11	8	4		24	9	10	1	7	14	9			8		18	4		15
Elonidae	1																2			2
Emberizidae	6	8	13	8	15	13	7	13	8	14	16	15	8	9	8	8	15	14	4	16	9	7	25	6	4	6	8	14	6	12	11	15	15	15	4	7		6	6	10		7	8	15	20	15		14	1
Embiidae															1		4			1					5				1	1				4	5	2
Embolemidae			1		1			1		1	1	1				2	1	1		1			1		1					1	1			1	1	1									2	1
Emmericiidae				2							1									1										3				1
Empididae	3	31	337	52	67	60	3	269	6	286	375	110	8	7	3	8	135	163	25	208			209		16	2	3	56	11	80	199	101	4	248	16	21	1	31		2		1	24		123	122	1	206	7
Empusidae		1		1		1			2						1	2	1		1	1					1		1	1	1	1				2	1	1							1
Emydidae		1	1	1		1	1	1			1	1			1		1		1	1					1			1		1	1			1	1	1		1		1		1	1					1
Enchytraeidae			43	6	16	7		25		48	87	85		30	3		49	48		65			51		5			6	1	4	49	76	27	69	5	10				1			5		57	38	26	70
Encyrtidae	6	4	81	5	14	132	17	47	18	284	177	104		5	10	34	270	122	9	137	3		236	26	8			60	1	108	287	14	1	178	8	20		38		2		158	12		45	14		68
Endecatomidae			1					1			1									1											1			1														1
Enderleinellidae								1			1							1																1														2
Endomychidae		5	13	6	10	10	4	12	7	12	11	9		5		14	16	5	9	16			9		15	2	6	18	8	16	15			37	15	17	4	6	6	5		3	3	6	9	9	1	8	3
Endromidae	1		1	1	1	1	1	1		1	1	1		1			1	1		1			1							1	1			1				1	1	1			1		1	1		1
Enicocephalidae				1
Enidae	4	15	5	7	2	15	1	5	10	4	5	1		2	1	56	5	1	3	5	1		2	1	3	6	9	25	17	10	5	1		8	3	2	2	3	5	2		1	8	1	1	1		3	7
Eniochthoniidae					1					1	1	1					2	1		1			1								2			2												1		1
Entaphelenchidae											7
Entocytheridae																				3														2
Entomobielziidae
Entomobryidae	2	18	95	17	30	50	10	59		57	60	9	1	2	7	16	116	30	13	112			46	8	13		12	8	12	33	62	26	6	69	13	20		11	6	21		45		17	27	25	3	56	9
Eohypsibiidae													2												2				1					3	2											2	2	2
Eosentomidae			20					1		12	21			1	3	3	6	1	2	7			1		1			1		1	1			6	1			2	16	1						1		33
Epermeniidae		6	17	5	5	8	3	17		11	14	6		7	2	2	10	7	4	19	3	1	8	1	4			10	1	14	8	2		18	4	2	1	6		7		1	6		5	6		12	1
Ephemerellidae		1	5	4		5		4		5	5	2		1			9	3	1	5	1		2	2	1			5		2	2	2		4	1	2		5	3	3			6		3	3		6
Ephemeridae		1	4	5		3	1	4		4	4	2		2			4	2		4	1		3	1				6		4	3	1		4				3	2	3			3		4	2		3
Ephydridae	17	9	145	9	98	128	2	98	11	137	176	64	17	38	44	61	125	114	39	131		1	151	2	85		1	31	20	19	150	58	13	185	85	72	1	41		9			19	50	96	54		163	30
Epicriidae
Epidermoptidae					12				2		4			1				1		8		2	5									1		5				1							1			1
Epilohmanniidae			2														2											2			1			2														1
Epimerellidae
Epiphanidae
Epipsocidae			1		1	1		1			1						1	1		1			1					1			1			1					1					1	1	1		1	1
Epipyropidae																	2
Equidae
Erebidae	72	105	146	149	90	164	98	134	72	114	119	92	4	81	42	28	175	91	89	168	60	30	86	28	82	11	39	161	75	149	132	42	3	188	82	109	30	90	76	82		103	144	49	85	63		109	7
Eremaeidae			8			5		1		5	6	2					13	4		7			5					1			7			13											3	2		7
Eremellidae												1											1								1																	1
Eremobelbidae											1						1														1			1														1
Eremulidae						1											1																	3
Eresidae		1	3		1	2		1		4	2	1				1	5		1	3	1		1		1	2	3	6	3	2	3			3	1	5	1	1				1	1		1			1
Ereynetidae			1		17			1			6						4			2			1		1									10	1	2									5	1		2
Ergasilidae		1	1		3	1		1		3	4	3	1	3				7		3	1		7					1			4	3		2				3		3			2		3	1		5
Erinaceidae		1	2	1	1	1	1	1	1	2	1	1		2	1	1	2	1	1	1	1		1	1	1	1	1	1	1	1	1	1		2	1	1	1	1	1	2		1	1	1	1	1		2	1
Eriococcidae			8		3	11		15		12	25	5				2	12	4	6	45	2		15		5			9		6	19	1	1	29	5	8		1	1	3		1	1	5	12	3		19	1
Eriocottidae						1			1								4			2					1									1	1	1								1
Eriocraniidae			8		8		2	8		8	8	8		7			2	7		8	1		8	3				1			3	8		5		1		5	2	8			1		7	7		7
Eriophyidae			122	125	12	76	1	21	22	94	209	77		32		4	65	246	16	199			94	7	18	2	2	43	8	119	310	42		257	18	52	1	34	45	48		7	52	4	12	14		259
Erirhinidae		4	15	10	8	14	12	11	1	14	16	12		11			8	10	1	16			13		3			10	1	8	17	9	2	25	3	2		7		10		3	3		12	9		15
Erotylidae	1	5	17	14	8	4		9		12	14	8		7		2	13	7		15			8					5		16	18	1		19		1	2	7	1	5					5	7		14
Erpobdellidae			11	4	1	2	3		1	7	13	5		4			7	4		9			6	3	2			5		9	7	4		6	2	1		4	5	4		3	14		6			7
Erythracaridae			2	1				3			5									5			1		1				1					5	1	1									2	1		1
Erythraeidae			25		7	14		48		1	19	4	2		1	3	14	9		12	1		6		1		8	4		1	25	7	3	44	1	2									4	19		61
Esocidae				1	1	1		1		1	1	1		1	1		1	1	1	1			1		1	1	1	1	1	1	1	1		1	1	1		1	1	1	1	1	1		1	1		1
Estrildidae																	3			1														1															1
Ethmolaimidae			1			1		1		1	1		1	1											1						1			1	1	1									1			1
Eucharitidae			1	2		3	1		1	3	2	1											1							4	4			1				1				2	3
Euchiridae						1			1																			1															1
Euchlanidae
Eucinetidae			1	1			1	1		1	1	1		1		1	1	2	2	2			1		2			1			2			4	2	1		1		1		1		1				2
Eucnemidae			18	12	7	11	7	10		15	18	6		6		1	9	11	5	22			6		3			5		12	17			17	3	5	1	3		11			1		6	6		16
Euconulidae	2	1	2	1	3	2	1	3		2	3	2		1	1		3	3	2	4	1		3	1	1			1		1	2	3	1	2	1	1	2	2	3	2		1	1		3	2		2	1
Eucotylidae						7				2	6					1				1			2								4											3	1					7
Eudrilidae																							1
Euglycyphagidae
Eukoeneniidae			2	1											1	1	3		2	9					4			3	1	2	1			9	4	1								2
Eulohmanniidae			1					1		1	1						1	1		1			1								1			1												1		1
Eulophidae	5	2	142	24	13	59	4	107	16	399	462	73	3	2	2	42	174	92	9	351	5		523	38	23			78	1	164	458	68	4	304	23	25		9		3		196	40	2	121	79		103	4
Eumegacetidae										1	1									1														1								3						1
Eupalopsellidae
Eupelmidae	2		15	5		9	1	2	6	30	28				2	7	53	3	7	33			15	1	8		1	5		32	31	2		26	8	5					1	14	5		2	2		7
Euphaeidae						1			1																		1	1															1
Euphthiracaridae			6		1	2				5	6	3					9	4		4			3					2			6			8											1	2		6	1
Eupodidae			5					5			6	4								1			13								1	1	1	5											1	4	2	8
Eurycercidae	12	24	36	4	36	10		34	2	35	44	36	13	3	13		46	42	1	47			35	34	16			19		7	31	39	21	41	16	13		37		36		8	5		36	34	3	40	7
Eurypauropodidae			8	3				5	1	1	1						3			6			1				1	6	2	2	1			3
Eurytomidae			32	9	9	10		9	3	54	114	4				1	16	18	2	49			101	1	5			7		32	109	14		38	5	6		2				11	7		9	4		17
Euscorpiidae		3	3	3		2		3							2		1		2	3			1		2		1	5		6	1			8	2	1					1			1
Eustathiidae						1	1	3			2	2					3			5			3					1						4											2	1
Euteliidae		1		2		2		1	1						1	1	1		1	1		1			1		1	2	1	2	1			1	1	1						1	2	1				1
Eutrombidiidae
Euzetidae			3		1	2		1		1	2	2					2	1					2								3			3											1	2		1
Evaniidae			3	1	1	4				2	2					2	4	1	1	2	1		1		1		1	3		2	1			2	1	2												1
Eviphididae
Eylaidae
Faginidae				1
Falconidae	4	9	7	9	7	9	5	8	10	9	8	9	5	6	11	9	10	8	6	10	4	7	9	4	7	8	8	10	8	9	8	7	6	10	7	8		7	5	6		7	8	9	7	6		9	4
Falculiferidae			1			1		1			2	1					2			1			2		1				1					2	1										2			1
Fanniidae		11	55	9	34	23	2	57	1	63	59	48	6	13	5	7	33	51	15	41	3	1	60	18	1			16	3	12	49	23	8	38	1	8	1	3	3	12		4	2	8	24	47	1	46	6
Fasciolidae		1	1		1	1	2	1	1	2	2	1		2			2	1	1	1			1	1	1			1	1		2	1		3	1	1		1		1		1			1	1		3	1
Fauriellidae						1					1						1			1
Faustulidae		1																		1
Felidae		2	2	2	1	1	1	2		1	2			1			3	1		2			1		1			2	1	2	2			2	1	1		1	1	1		1	2			1		2
Feltriidae
Ferussaciidae	1	2	2	3	1	2		2	2	1	1	1			4	10	9		3	8	1	3	1	1	4	3	2	4	2	6	2	1		6	4	11	1		1				2	5	1	1		1	1
Figitidae	1		68		2	1		5	1	17	100	37	1			6	22	48	4	77			74		1		2	5	2	1	27	5	12	42	1	1	1	4	1		1	8		1	57	35		19
Filariidae							1				1						1			3			2											3
Filaroididae							1				2						2			2			5									1		3												1		1
Filistatidae						2		1	1						2	6	1		2	2					1	1	1	3	2	3				2	1	1							1	1					3
Flatidae			1			1		1	1						1	26	1		1	4					1		1	1						3	1	1													1
Flosculariidae
Forficulidae	5	4	6	6	3	4	1	6	5	5	6	3	1	1	3	18	20	2	3	12	1		6	1	5	1	3	9	4	8	5	1		18	5	6		3	2	2			1	1	3	3		5	1
Formicidae	25	69	122	2	70	154	61	137	31	117	129	58		47	62	55	285	58	100	218	24	63	66	16	78	53	100	209	81	1	89	23		213	78	114	19	50	49	44	16	62	92	78	67	47		94	20
Fredericellidae			1		1	2	1	1		1	2	1		1			1	1		1			2		1				1		1	1	1	1	1				1	1					1	2		1
Fregatidae					1							1					1			1			1									1														1			1
Freyanidae							2	2		3	4						1			4			5											8											3	2		7
Fringillidae	10	11	20	12	17	13	16	16	13	18	18	18	14	17	13	11	15	18	9	19	13	9	20	10	9	9	10	14	9	15	18	15	10	16	9	8		17	13	17		13	11	11	17	18		18	5
Frontipodopsidae
Fundulidae															1		1
Gabuciniidae			2			1	1	2			5	1					1	2		6			5								1			6											4			1
Galacticidae
Galeodidae						1			1																			4															1
Galliobatidae																				1
Galumnellidae																	2
Galumnidae			19			11		5		9	14	5					48	8		6			10								15			20											9	7		17
Gammaridae	2	6	6	11	11	20		5	2	5	15	9	1	1	16	8	59	6	6	31	7		12	6	11	2	2	20	6	10	6	4	3	21	11	10		2	5		2	2	4	2	12	9	2	14	2
Garypidae				1					1						2	1	3			1					2	1	2		1	1				2	2	2								1
Garypinidae									1								1		1	1					1		2	2	1	1				2	1	2
Gasterosteidae			1	1	2	2	2	1		1	2	2		2	1		1	3	3	3			2		1	2	2	2	2	1	1	2	1	1	1	1		2		2		2			2	2		2
Gasteruptiidae			19		10	10		16	2	16	13	1			1	3	15	7	8	16	1		5		11	3	8	15	8	1	18	1		19	11	11										2		4
Gastrodiscidae																							1
Gastrodontidae	1	1	2		2	1	1	1		2	3	2		1	1	1	3	1	1	2	2		2	2	1			1		1	2	2	1	1	1		1	1	1	1		1	1		2	1		1	2
Gastronyssidae
Gastropodidae
Gastrothylacidae
Gaudoglyphidae											1									1			1											1
Gaviidae		3	4	1	4	3	3	3		3	4	4	4	4	1	2	4	4		4	3	1	4	3			1	3		3	3	4	2	3				3	1	3		2		1	4	4		4	2
Gehypochthoniidae																	1			1			1											1
Gekkonidae	1	2		1		1			2						2	5	2		3	2		2			3	2		3	3	2				4	3	2					2		1	2
Gelechiidae	21	76	294	57	144	133	117	244	75	238	268	177	1	164	20	59	327	180	82	400	58	19	160	28	107	7	48	209	73	96	252	71	5	339	107	120	7	133	59	183		1	137	37	150	140		203	6
Gelyellidae								1												1
Geoemydidae		1		1		1			1								1			1						1		1	1	1													1
Geogarypidae		1	1			1									1	2	2		2	2					2		1	2	1	1	1			2	2	2								2
Geometridae	270	245	467	210	331	441	269	466	107	394	427	303	19	290	109	62	604	307	222	588	212	55	294	112	175	25	33	369	113	301	397	204	17	582	175	236	127	297	267	304		77	352	59	299	283		404	9
Geophilidae		3	10	17	6	9	1	10	4	12	12	8			4	4	19	8	10	26	9		15	4	13	3	9	13	6	17	9	9	2	24	13	12			7		4	7	4	3	8	8		10	4
Geoplanidae
Geotrupidae	9	11	10	12	7	16	7	8	1	9	9	7		6	4		32	6	10	15		1	8	7	13		1	12	1	13	8	7		15	13	14	7	6	8	6	1	8	12	2	7	6		10
Gerridae	1	5	11	1	9	11	8	11	2	9	11	9		8		1	12	9		12			10					9		10	9	8		13			9	8	6	8		6	9	1	9	8		11
Gietellidae																1																																	1
Gigantorhynchidae			1		1	6		1		1							1																	1						1		1						1
Glaphyridae		4				8		1	1								3										4	11	2					2								1	8
Glareolidae		1	3	1	3	2	1	3	2	3	3	3		1	3	3	2	3	1	3	1	1	4		1	1	1	3	2	2	3	3	1	2	1	1				1		2	1		3	3		2
Glaresidae																	2														1											1
Gliricolidae											2						1	1																1														1
Glomeridae		5	14	11	4	5	1	14		8	13	1			1	6	22		1	27		1	4	1	2	1		7		12	9	3		53	2	3		1	4		2	1	4	2	2	1		10
Glomeridellidae			1	2					1		1						1			1							1	1	1	3	1			3									2
Glossiphoniidae			11	5		8	8	1		8	13	9		5			8	5	1	8			5		3			7		7	8		3	7	3			5	3	5		6	10		6	1		3
Glossoscolecidae											1					1		1																															1
Glossosomatidae	4	3	13	9	7	14		10	1	9	12	3		1	1	1	19	3	2	17	1		6	2	1	1	1	14	1	7	10	5		12	1	2	1	2	4	2			3		4	4		9
Glycyphagidae
Glyphipterigidae		2	18	1	16	9	3	20	1	16	17	13		11	2	6	19	10	10	25	8	1	14	6	10		3	9	4	10	18	8		20	10	5	3	11	7	13			6	2	11	12		15	1
Gnaphosidae	29		83	2	44	94	25	83	3	71	77	35		32	16	48	107	43	47	157	6		33	6	21	12	38	81	65	63	76	11	3	142	21	65	39	32		32		19	70	22	31	44	2	51	9
Gnathorhynchidae											2																							1
Gnathostomatidae			1			2														1								1			2			5														1
Gobiidae		1	1	1		9		1		1	1	1		2									1		5	7	7	7	7	4	1			5	5	5						2			1
Goeridae	1	3	6	6	6	6	2	6		6	6	4		3			5	2	2	6	2		3	3	3	1		4		6	6	3		7	3			3	5	3			2		5	2		6
Gomphidae		3	4		5	4	4	7	1	4	7	3		4			8	3	1	8			2		2	1	1	6		6	4			8	2	3	1	4	5	4		2	3		5	2		4
Gongylonematidae			1			4	1					1			3		5			1					1						1			2	1	1						1						2
Goniodidae											18						13	11							2						13			15	2													15
Gordiidae			2		3	1		2		1	11			2			2	2		3			1		1					6		1		5	1							1						3
Gorgoderidae		4	1			6	4	2		11	9	4					6	5	1	4			4		1			1			4	2		2	1			8		8					1	3		12
Gracillariidae		29	134	10	94	66	39	118	11	124	123	86	1	72	8	19	98	76	38	148	32	7	94	34	49		16	67	5	47	116	53		151	49	36	5	69	45	80		37	40	3	94	74		112	5
Graffillidae			1					1			2						1	1		1														1														1
Grapsidae					1					1	1	1						1		1			1																	1					1	1		1
Gruidae	1	1	1	1	1	2	1	1	1	1	2	2	2	1	2		2	2	1	2	1	1	2	1	1		1	2	1	1	2	2	1	2	1	1		1	1	1		2	1	2	3	2		2	1
Gryllidae		11	9	9	4	11	2	9	10	7	9	2		1	10	16	42		13	15	3		3	1	19	2	10	16	8	10	9	1		17	19	16	3	3	4	2		4	11	9	5			6	7
Gryllotalpidae		1	1	1	1	2	1	1		1	1	1			1	1	3			3	1		1		4		1	2	1	1	1	1		6	4	2	1	1	1	1		2	2	1	1			1
Gustaviidae			1			1				2		1					5	2		1			1					2			1			4											1	1		2
Gylippidae									2
Gymnodamaeidae			5			6		2			2	1					21	1		4								2			3			6												1		4
Gymnophallidae						3					6							3	1	6			14										4													1		4
Gyrinidae	1		9	11	10	10	11	9		11	12	11		9		1	9	11	1	15			8		4			10		12	7	2	1	12	4		2	3		2			6		11	11		13
Gyrodactylidae		2	13		5	38	11			59	27	3					7	22		2			23	2							34	2		4				21		12					1	24		50
Gyropidae											1						1	1																1														1
Haaseidae			7	3		1		3		3	5									3										3	3			3														1
Habronematidae						4			1		2			1			11		1				3								2		1	7				1				1			3			8
Habrotrochidae			57		8	2		25		1	50				10	16	15			14			33				4				23	17	5	11											40	7	8	20
Hadziidae				1													1											1		1				2									1
Haematopinidae								4			4							3																4														4
Haematopodidae		1	1	1	1	1	1	1	1	1	1	1	1	1	1	2	1	1	1	1	1	1	1	1	1		1	1		1	1	1	1	1	1	1		1	1	1		1	1	1	1	1		1	1
Haemogamasidae
Haemopidae			1	1		1	1			1	1			1			1			1				1	1			1		1	1	1		1	1	1		1	1	1		1	1	1	1
Hahniidae			11		9	9	5	11		9	14	7		6	2	1	10	5	1	14			9	5				6	1	6	8	6		16			7	5		6		3	4		8	7	1	10
Halacaridae
Halaphanolaimidae			4		4			2		3	5	1		2											1						4			5	1	1									2			3
Halarachnidae
Halictophagidae		1								1	3									2			2							1	2			1		1
Haliplidae	1	6	20	14	20	14	17	15	2	18	20	18	1	2	6	2	17	17	12	22		1	19	13	9			14	3	18	16	12	2	20	9	9			2	16			8	2	20	14		19
Halolaelapidae
Halophilosciidae															4	1	3		4	5			2		5	4	2	4	4	3		1		7	5	4								3	1				2
Halosbaenidae				1												1																		1
Haplobainosomatidae																	2			4																													1
Haplochthoniidae																	3	2										1			1			1											1			1
Haplodesmidae			1								1									1			1																						1
Haploporidae						1																	2		4									4	4
Haplosplanchnidae																									1									1	1
Haplotaxidae		1	1	1	1	2		1		1	1	1					3		1	3			1					1		1	1			1					1			1	3					1
Haplozetidae			3			2					1					1	15	1		1								2			3			2														3
Harpacticidae						1					6									10			5					1				2	2	6						1					1	6	1		1
Harpyrhynchidae
Hartertiidae																	1
Hebridae		3	2	4	2	3	2	2		2	2	2		2		2	1	2		4			2					2		2	2	1		4					2	2		2	3		2	2		2
Hedruridae			1								1																				1			1														1
Helcomyzidae					1							1											1									1		1											1
Heleomyzidae	32	3	76	10	43	52	4	69	8	83	79	38	3	11	2	2	61	49	19	59		1	56		5		1	5	2	15	70	34	5	67	5	3		20		22		2		1	41	44	3	79	1
Helicidae	9	34	19	21	8	17	3	12	7	12	14	6	1	4	9	47	21	6	12	31	4	4	7	4	12	13	14	46	7	30	13	6	2	40	12	11	8	6	7	6		2	14	6	7	5		12	3
Helicodiscidae		1	1		1			2		1	2				1		1		1	2	1		1		2			1		1	1			2	2	2			2						1			1	2
Helicodontidae		3	1	1	1	3		3		1	1						2			2			1			1	1	8	2	2	1			5			1		1				4		1			1
Helicopsychidae						1		1									1		1						1	1		2			1			2	1	1
Heligmonellidae					2	4	1				1				1		4		1	4			6								2			3		1		2										2	1
Heligmosomidae			1		3	11	5	4			8	3			1		9	7	4	8			8								12	1	1	4		1		6				2				1		9
Heliodinidae			1		1			1		1	1						1			1			1								1			1											1			1
Heliozelidae		1	5		4	1	1	4		6	6	4		3			1	3	3	7			5	1			1	2		2	4	3		6		3		3		4			1	1	5	4		6
Heloridae	2		3			3		4		4	4	3					3	3		3			3					3			3	1		2		1		1				1						1
Hemerobiidae	8	7	40	5	13	31	5	37		34	38	24	1	16		3	37	26	1	43			31		4			22	2	15	36	15	1	44	4	4	32	10	11	17		8	1	4	23	27		33	4
Hemicycliophoridae			2		3			4			6			1			7			1								1			3			5		1									9			10
Hemicytheridae					1
Hemileiidae
Hemisarcoptidae
Hemiuridae		1				1		1		1	4	3					3						2											1						1						3		4
Henicopidae			1		1	1		1		1	1	2	1			4		2		2			1				1	1				1	1	2					1						1	1		1	1
Hepialidae	3	4	7	6	5	6	5	7		5	6	5	1	4			6	7		9	4		5	4				4	1	3	7	4		11		3	5	5	4	5			6		5	6		6
Heptageniidae		10	51	17		41		36		36	44	6		1			37	5	6	50			11	9	4	1	1	18	1	9	12	9		34	4	10		7	13	6			19		15	3		32
Hermanniellidae			3			2		1		1	1	1				1	4	2		1			1					4			2			4											2	1		4
Hermanniidae			4			1		1		3	10	2					4	3					4								2			2											2	3		3
Herpestidae				1													1													1
Hersilidae																1	3
Hersiliidae
Hesperentomidae			6	2				1		1	1																	1		1				1					1									1
Hesperiidae	12	22	24	20	15	26	12	25	4	16	23	10		12	3	1	30	10	10	29	3	5	8		4	4	10	26	5	23	20	1		30	4	14	13	14	14	12			25	1	16	10		16
Hesperinidae		1	1			1																								1				1
Heterakidae		1				5	2			1	1			2	1		6			1			4								1		1	7		1		3		1		2						3	2
Heteroceridae		5	12	5	6	10	2	10	1	8	16	6			3		16	8	3	19			7	1	5	1		10	3	11	10	3		18	5	8		7		1		3		1	12	2		8
Heterocheilidae					1							1											1									1													1			1
Heteroderidae			4		15	2			4	5	26	1		19		3	13	3		2			6	1	3			2		3	13	4		17	3	2		7		12		2		1	24	8		21	2
Heterogynaidae																											1
Heterogynidae	1	1		1				1							1		4			4								1		1				2									1
Heterolatzeliidae				1
Heteronemiidae															1		5			1
Heterophyidae			1		1	8	3	1		6	8	3		2			8		4	8			8		2						5	2	1	12	2			2		1		5			3	3	1	10
Heteropsoridae
Heterorhabditidae								2		1	2	2		1			1			1			1					1			2	1		1				1				1			1	1		2	1
Heteroxynematidae						2	1	1				1			2		4			1			1								1	1	1	1		1		2				1						2
Hexarthridae
Hexathelidae																	1												1					1
Hilarimorphidae			2					2			2																																					1
Himantariidae		3	1	4	1	4		2	2		1	1			3	1	5	1	2	8	1		2		4	2	2	3	1	3		1	1	5	4	5			2		3		2	2	1	1		1
Hippoboscidae	3	4	6	3	10	5	3	15	8	16	12	10	1	5	3	9	11	10	3	13	4	4	9	4	10	3	5	12	6	3	11	8	2	18	10	10	3	4	3	4	3	4	3	3	8	8		11
Hirstionyssidae
Hirudinidae			2	1		1		1		1	2	1					4	1		1			1		2			2		3	2	1		3	2	2		1	1			1	3			1		1
Hirudisomatidae						1											2			3								1		1				3
Hirundinidae	5	5	5	5	5	5	3	5	5	3	5	5	3	3	5	6	5	5	5	5	3	5	7	3	5	5	5	5	5	5	4	4	5	5	5	5		3	4	3		4	5	5	4	4		4	3
Histeridae	24	80	94	81	60	114	60	73	38	93	82	59		38	29	37	158	38	64	145		3	48	1	83	26	28	133	58	111	102	17		142	83	93	17	47	37	48	1	42	68	24	60	43		80	10
Histiostomatidae
Holopediidae	1		1		1		1	1		1	1	1	1	1			1	1		1			1	1							1	1	1	1				1	1	1					1	1		1
Homocaligidae
Homotomidae			1			1		1	1						1		1			1	1		1		1					1				1	1	1								1
Hoplolaimidae			12		9	7		2	7	16	12			3	1	11	33		1	15	1		5							1	9			17		1		1		1		3			8		1	20	5
Hoplopleuridae								1			4							2																4														6
Hormogastridae																	5		2	4					3									2	3	1
Hubbardiidae																1							1
Humerobatidae			1								2	1					2						1								1
Hungarobelbidae
Hungarohydracaridae
Hyadesiidae
Hybosoridae		1		1		1			1						1	1	1		1	1					1		1	1	1	1				1	1	1					1	1	1	1					1
Hybotidae	1	5	168	3	130	33	3	185	6	196	226	104	2	83	3	22	93	134	11	99			175		6		5	16	3	39	130	75	2	146	6	6		45		33			15	12	90	97		89	4
Hydrachnidae
Hydractiniidae																			1				1	1							1	1	1												1	1	1
Hydraenidae	1	36	51	45	24	43	18	40	20	45	53	19		15	23	13	142	18	22	95	6		29	14	30	15	15	103	15	68	36	18		129	30	39	2	11	24	15	1	3	37	10	32	13		42	1
Hydridae		3	3	3	5	3	4	4		4	5	3		1				4	3	2			4									2	1	2		1	1			1					5	4
Hydrobatidae		1	2		2	1		3	1	1	3	3	2	1	2	5	5	2	1	5	2	4	6	2	1			1		1		4	3	4	1	1		1	1	1				2	3	3		2	5
Hydrobiidae	3	17	44	40	9	31		12	1	4	42	5		4	13	1	54	4	7	139	4		7	2	6	1	4	41	3	68	7	5	1	66	6	9		5	2	5			39	5	9	3		12
Hydrocenidae																1														1																			1
Hydrodromidae
Hydrometridae		1	2		2	2	1	2	1	2	2	2		1		1	1	2		2			2					2		1	2	1		2			1	1	2	1		1	1		2	2		2	1
Hydrophilidae	1	20	121	39	49	56	3	80	16	40	126	87		69	41	19	114	83	48	144		5	99	1	57			74	1	76	103	41	5	139	57	48	3	60	3	53			20	4	96	71		96	14
Hydropsychidae	2	11	18	15	13	20	3	18	3	18	19	8		4	2	1	22	9	5	22	2		11	6	4	4	2	20	2	10	15	7		20	4	9	6	8	6	6			12		10	7		15
Hydroptilidae		12	27	9	12	27	12	32	8	25	34	18	1	9	5	7	46	28	10	29			31	2	14	11	7	36	9	2	22	22		42	14	23	1	18	9	27			7		17	18		25	2
Hydroscaphidae																	1		1	1					1									1	1
Hydrovolziidae
Hydrozetidae			5			1		1			1	1					1	1		2			2								3														2	2		3
Hydryphantidae
Hygrobatidae
Hygrobiidae			1	1	1	1					1						1		1	1	1		1		1			1		1		1		1	1	1			1						1			1
Hygromiidae	13	26	29	16	16	25	4	22	18	20	30	8	1	4	21	36	96	4	14	69	7	3	17	7	17	18	21	37	33	28	22	10		58	17	26	9	6	9	5		7	16	10	16	2		19	14
Hylidae		1	1	1	1	1	1	2		1	1	1				1	2		1	2					1	1	1	1	1	1	1			3	1				1			1	1		1			1
Hymenolepididae		2	12		13	119	31	62		98	78	15	2	16	5	5	74	15	2	85			86	1	5			2			74	1	27	72	5	3		5		4		12		2	11	10	5	128	3
Hynobiidae
Hypochthoniidae			2		1	1		2		1	3	1					3	2		2			2					2			2			2											2	1		2
Hypoderatidae
Hypodontolaimidae										2	4														2						2			1	2	1				1					2			1
Hypogastruridae		18	46	7	6	14	3	32		24	43	6	3	2	6	26	73	28	7	77	2		31		1		2	4	9	12	33	16	11	49	1	5		3	1	9			1	6	5	26	9	48	9
Hypsibiidae	1		33			11		11		18	18	9	5				20	20	4	18	2		19		13			9	5	12	34	7	14	48	13	19									5	16	23	29
Hystrichopsyllidae	2		3	1	2	2		4		2	4	3	3		2		4		1	4	2		2		2			2			3	2		4	2	2			1						2	1		4
Hystricidae																																		1		1
Iagotrematidae																			1
Ibaliidae					2			2	1		3	1					1			2			2					1			2			1												1		2
Ichneumonidae	108	43	2405	4	1455	1738	188	1146	48	1843	3385	493	141	162	30	129	1410	2391	489	2746	1	4	2356	1	176	2	6	253	17	54	2047	1126	95	1891	176	199	6	489	191	1049		627	31	23	1556	1539	14	2606	26
Ichthyostomatogasteridae
Ictaluridae		1	1		2	2	1	1	1	2	2	1		1	3		3	1	3	3			3		3						3	2		3	3	3									2	1		2
Icteridae												2								1		1	3									1	2	1											1	3
Idiopidae																1
Illiosentidae				1																														1
Ilyocyprididae	1		3	1	5	2	1	4	1	4	6				2	2	6			7			6		2			1	2		4	1		7	2				4				5		1	3		4
Incurvariidae		4	10	3	6	3	2	8		8	8	7		6			5	8	1	10	1		5	4				2		3	7	5		9		1	1	3	1	5			2		7	8		8
Ingolfiellidae						1										1	1			2					1			1							1								3
Inocelliidae			2			1		1			1						1	1	1	2					1			1	1	1	1			1	1	1							1		1			1
Iolinidae								1			5	3					3			2			4				1	1			8		2	6		5				4					1	3	3	11
Iotonchiidae			1								4												2																						1
Iphiopsidae
Ironidae			3					2		3	4			1											1						4			1	1	2									1			3
Ischnopsyllidae		1	3		8	8		11	1	7	14	10	11		1	2	10		3	11		1	7		3			9		1	11	7		11	3	3									11	3		14	1
Ischyropsalididae
Isohypsibiidae			27			3		6		13	13	5	1			1	6	14		8	2		9		9			2	4	6	32	6	6	43	9	18								1		7	11	17
Isolaimidae					1																										1			1								1			1
Isonychiidae			1			1				1	1						1			1								1			1							1					1		1			1
Isotogastruridae		1														1
Isotomidae		7	87	34	15	31	13	66		59	100	30	11	28	10	27	118	56	4	131			62	26	7		8	4	19	13	45	44	20	73	7	17		31	1	41	1	15	1	2	18	88	28	94	19
Issidae		5	5	1	2	14		6	13	4	3	2			3	18	34		6	16			2		7	2	2	37	6	8	6	1		25	7	11						6	1		2	1		3
Ituridae
Iuridae																											2	1	1
Ixodidae		2	4	1	9	14	4	11	2	12	14	9	1			2	10	2	6	18	1		15		6	1	2	5	2	6	5	8	3	11	6	2		1	1	1		3	2		6	8	1	11	2
Ixodorhynchidae
Jacobsoniidae																1
Janiridae						2					2				2				3	2								1			1	1		1		1													1
Japygidae		2	3	4	3	1		5	1	2	4				2	2	7		4	13					6	1	15	17	3	2	3			23	6	6								1
Johnstonianidae	1		5		1			7		1	8						3			4			4								3			4											2	1		10
Julidae		24	63	40	16	45	12	37	4	30	45	20	1	9	5	58	61	11	9	53	7	2	21	11	7	5	4	54	6	56	40	12	2	133	7	10		17	14	10	6	11	25	4	21	12		38	8
Kalotermitidae																3	1			1					1			1		1				2	1	1													2
Karkinorhynchidae											2							1		2
Karschiidae									1							1												2
Kateretidae	8	10	14	13	12	11	12	13	6	12	13	8		4	6	6	15	7	5	15	5	5	9	6	5	8	10	11	4	14	11	7		13	5	7	11	7	10	7	3	11	12	3	10	7		7	3
Kathlaniidae						1											3											1			1																	1
Katiannidae		1	11		2	2		6		4	9	1			1	1	8	9	1	9			9		1			1	1		4	3	2	6	1	4			1	3					2	8	4	7	3
Kermesidae			6			3				2	2	1					5	1	2	7			3		1			3	1	2	5			9	1	5						2			2			4
Keroplatidae	10		26	2	41	42	1	49	9	56	55	28	1	32	4	5	30	41	13	54	13		52	8	6	2	2	28	10	13	36	23	4	46	6	7	1	3	1	27				8	38	14		34	1
Kinnaridae																2
Kiwinematidae						1
Kliellidae																												2
Knemidokoptidae
Kodiakellidae																	1
Koinocystididae			2					1		1	4						1			1													1	2									1					2
Kramerellidae						1		2		2	9							4		5			2								1			12								1			3
Krendowskiidae
Kurenkovidae
Kytoditidae
Labidostommidae
Labiduridae		1	1	1		1	1	1		1	1			1	2	2	2			1					2	1	1	1	1	1	1			2	2	2		1		1			1	1	1			1	1
Lacertidae	8	9	4	8	2	8	1	3	3	3	6	1		1	3	7	20		3	12	2	6	1		3	2	1	15	1	8	5			9	3	3	1	1	2	1	2	5	5	1	2			3	1
Lachesillidae			4		3	1		8	4		4	1				4	6	2		5			3		1			4		3	4	1		5	1				2	2					2	2		4	1
Laelapidae
Laemobothriidae											5						4	1							3						4			2	3													3
Laemophloeidae			16		8	1		1		15	19	5				3	9	6	5	20			7					7		8	15			13		5		1										16	2
Lamellareidae																	1
Laminosioptidae
Lampyridae		1	3	6	3	4		3	2	2	3	2		1	1		6	1	1	11			1		2	2		11	1	7	3			11	2	2	4	1	2	2		1	7	1	3	1		2
Languriidae			3	1						2	4				1	3	1	1		5			1					5		2	4			4						1		3	1
Laniidae	2	4	5	4	5	5	4	4	6	4	6	4	3	4	4	5	6	6	2	7	2	4	7		3	4	4	6	4	4	5	4	3	5	3	3		4	4	3		3	5	4	6	6		5
Laophontidae					2	3					9					2	1	2		13			14				1	1		1		6	2	11							1		1		2	12		2
Larcidae			1			1				1	1	1					3						1						1					1						1					1			1
Lardoglyphidae
Laridae	1	19	28	12	28	22	18	27	23	24	31	30	21	19	20	22	35	24	18	35	18	22	36	16	17	18	19	27	18	18	26	32	25	30	17	16		20	16	20		17	15	20	32	29		26	22
Lasiocampidae	10	10	21	15	16	22	14	21	2	18	22	14		16	3		31	15	9	28	9	3	11	7	5	2	2	20	3	17	18	7		23	5	13	9	16	17	16			20	4	16	14		19
Latridiidae		5	71	25	49	30	45	66	13	67	83	53	3	41	4	29	80	71	22	86		1	54	1	15	2	2	48	9	33	73	17	2	93	15	17	13	37	11	48	4	6	11	15	47	61	1	65	13
Lauriidae	1	2			1	2		2			1	1	1		1	4	3		2	3	2	1	3	2	2	2	1	2	1	3		2		2	2	1			1	1			1	1	1	1			6
Lauxaniidae	37	3	67	4	44	31	4	77	8	72	72	37		33	1	10	62	39	11	69			54	12	9	1	1	23	5	16	71	35		74	9	28	17	33		38		4	3	4	38	41		59	1
Lebertiidae
Lecanidae		1	25		29	1	1			5	51		2	1	20		14	8		16			14		1						16	1	12	26	1	1				7		10	1		13	1	4	17
Lecanodiaspididae									1								1		1	1					1					1				1	1	1
Lecithasteridae											1	1					1						1					1										1								1		1
Lecithoceridae		2	2	1		3		2		1	3						8		2	7		4			1			4	1	2	3			4	1	4			1			2	1
Lecithodendriidae		6	3		5	23	16	15		5	25	5			1		23	1	1	26			8					5			26			23				2		4		8		1	1	2		39
Leeuwenhoekiidae						2														1
Leiodidae	2	51	155	189	51	88	56	97	16	137	151	102		29	8	18	247	119	27	277		5	101	13	42	2	5	105	16	137	88	31	1	337	42	46	14	39	17	49	1	6	47	3	70	100		156	1
Lepadellidae
Lepidomysidae																																		1
Lepidopsocidae											2									1			4									1
Lepidostomatidae	1		4	6	3	3	3	3	1	3	4	3		1		1	3	1	1	3	1		3	3	1			4		2	4	3		4	1	1		2	3	3			1		3	2		3
Lepismatidae		1	2			2		2	9	1	3	2	1		11	11	23	2	5	8			2		7	8	5	6	4	3	3	1	1	12	7	11			1		2		1	5	2	2		3	2
Leporidae		1	3	1	2	2	2	3	1	2	3	2	1	2	2	1	4	2	1	3	1	1	3	3	2	2	2	2	2	2	2	3	1	5	2	2	2	2	2	2		2	1	1	2	3		3	1
Leptestheriidae			2		1	2				2	1				2		1			1								2		2	2			2		3
Leptoceridae	1	14	33	14	31	32	17	31	1	33	39	24		20	1	1	31	27	6	40	4		31	10	5	4	2	25	1	20	36	22		34	5	5		31	20	35		2	13		31	25		37
Leptocytheridae											4							5		1								1															4		1	1		3
Leptodoridae		1	1		1			1		1	1	1						1		1			1	1								1	1	1				1		1					1	1		1	1
Leptolaimidae			3		1			1			3												1								1		1	2											4			2
Leptonchidae					1			2		1	6	1					18						2								8			3		2		2				1			7			8
Leptonetidae	1		1	2		2								1	1		5		1	19					5	1		5	2	6				5	5	1
Leptophlebiidae		1	10	5		9		8		9	11	5		1			20	8	3	13			6	3	3			9		5	8	3		13	3	3		7	5	6			7		8	7		9
Leptopodidae	1	2	1		1	3		1	3	1	1					2	4			4	1		1					2		1	2			4					1			1	2	1
Lernaeidae		1	2			1		1		1	3							1		1			1								1			2									1		2			2
Lernaeopodidae			3		3			2		4	9							11		3			7								3	1	3	1											3	1		6
Lestidae		6	8		6	8	5	7	6	8	8	4		4	2		7	2	5	8	3		2	1	5	3	6	6	4	8	7	2		9	5	7	4	4	6	4		6	7		7	2		7
Leucochloridiidae					1	5				3	7	1				3	1	2		2			6							2				1								3				2		7
Leucochloridiomorphidae										2	1									1											2																	1
Leucospidae			5	3		1		4		3	3						4		2	5					2			3		5	3			6	2	6						1	2	1				1
Leuctridae	12		36	21	9	19	3	34	1	23	28	4		2	3		46	4	4	59			6	1	4	2	1	12	3	1	14	3		48	4	5		3	10	4			22		6	4		24
Liacaridae			24			4		4		5	11	5		1			22	8		4			7					1		1	11			17											4	4		8
Libellulidae		14	22	1	20	18	14	22	12	22	22	16		15	8	6	24	15	13	22	10		14	4	14	5	15	16	11	19	19	4		22	14	16	13	17	20	16		14	16	6	21	14		22	1
Licneremaeidae			2							1	1						3	1		1			1					1			1			4												1		2
Licnobelbidae			1														3			1											1			1														1
Licnodamaeidae			2														3			1								2			2			3											1			2
Liebstadiidae
Ligiidae			2	3	2	4		1		2	3	2	1	1	1	1	2		1	3		2	3	1	1	2	1	5	1	2	2	1	1	3	1	1					1			1	2	2		2	1
Limacidae	5	11	9	5	6	13	3	12	1	8	8	6	1	5	4	3	8	4	8	14	4	2	7	6	3	2	1	8	1	6	8	6	1	30	3	3	4	5	4	5		3	9	3	6	4		10	3
Limacodidae		1	2	2	2	2	2	2	1	2	2	2		2			3	1	2	3			2			1	1	3	1	2	2			2		1	1	2		2			2		2	2		2
Limnadiidae			2		1	1				1	1	1						1		2					1						2			1	1			1					1		1	1		1
Limnephilidae	21	15	105	59	60	73	43	96	5	75	96	57	10	41	3	1	60	77	18	102	18		54	26	15	2	5	50	10	57	59	38	9	109	15	27	35	54	33	55		1	29	1	54	71		93	1
Limnesiidae
Limnichidae			3		3	2		3	3	2	3	1		1	2		6		3	6			1		3			2			4			6	3	3		1		2					4
Limnocharidae
Limnocytheridae			6		1	2	1	4		3	6	2				1	3	5		6			4	2				2		1	4	3	1	4					1				9		2	2		5
Limnozetidae			2					2		1							4	2					2								1			1											2	1		3
Limoniidae	3	59	258	70	157	198	10	289	4	276	278	159	17	59	1	24	76	165	80	229			210		9	1	9	20	36	72	116	119	9	222	9	65		193	18	93		18	80	1	143	124		215	9
Linderiellidae																	1			1
Lindiidae
Lineidae											1
Linguatulidae										1		1						1		1			1		1			1			1	1	1	1	1	1
Linhomoeidae																																													1
Linognathidae								6			6							3																5														3
Linotaeniidae		3	3	4	3	4		4		3	4	3	1				2			3	1		3	1				4		3	2	2		5		1			2			1	3		3	2		5	1
Linotetranidae
Linyphiidae	32		373	22	263	223	145	355	5	308	392	217	2	201	23	61	224	278	81	486	19	3	281	134	21	6	5	74	16	102	192	201	61	450	21	15	198	159	1	155		57	100	8	231	248	16	302	39
Liocranidae			9	2	13	13	6	11	1	10	12	8		8	3	6	16	9	8	19	1		12	2	5	2	1	8	1	8	11	5		15	5	5	5	7		2		1	8	2	13	8		12
Liodidae			4			3					2	2		1			5	2		4			2					4			3			3								1				1		3
Liposcelididae		1	8		9	1		13	9	1	13					11	15	7		16			18				1	15	2	14	7	2		18					8	2				3	1	3		7	4
Listrophoridae
Lithobiidae	1	26	34	36	15	57	4	32	3	30	35	12	3		11	11	47	7	12	46	3	5	13		18	6	13	37	9	35	29	6	3	69	18	18		4	15	4	5	8	15	4	19	9		32	4
Lohmanniidae						1					1						10			1			1					5			1			4														2
Lonchaeidae	15		25		13	1		29	3	54	41	27		4	1	6	15	43	1	16			43		1			5		1	24	12		22	1	3		3							6	1		34	2
Lonchopteridae	1	2	8	2	4	2		7	1	9	9	5		2	1	2	3	6	2	7	2		7	1	1			2	2	3	5	1	1	6	1	1	2	3	1	2		1			5	7		6
Longidoridae			10		13	10	1	11	1	5	16			1			17	1		13			9		4			1	1		3	2		26	4	4		1				1	1	2	15	2		11
Lophopodidae			1		1	2	1	1		1	1	1					1			1			2								1	1		1											1			1
Lophoproctidae															3	1	1		3	2					1									3	1	1								1
Lordalychidae																				1														1
Lotidae			1		1	1		1		1	1	1		1				1	1	1			1		1						1			1	1	1		1		1					1	1		1
Lovenellidae					1						2	2			1		1	1		2			2									1	1	1			1	1							1
Loxoconchidae					2						3				1		1	5	1	1														2											2	2		4
Lucanidae		6	7	6	5	7	6	7	2	7	7	5		6			10	5	4	10			3		5			7		7	7	2		8	5	4		6	5	6		2	3		5	7		7
Lumbricidae	9	17	55	44	27	44	11	44		32	39	20	8	13	14	21	108	16	25	124	17	1	26		16	1	16	42	6	60	56	27	14	76	16	19		11		12		16	52	1	17	17	1	36	10
Lumbriculidae		3	8	8	9	5	4	6		14	11	4	2	8			13	5	3	19			8	3				2		4	4	2	2	11				3	3	4		6	10		6	3		9	1
Lusitaniosomatidae
Lycaenidae	27	44	51	52	34	56	30	52	16	46	48	26		31	10	9	76	28	21	62	11	12	19	5	12	9	14	65	11	52	50	7		57	12	21	26	35	30	29	1		56	10	23	23		47	1
Lycidae		3	7	6	3	4	5	6		7	7	5		3			5	7	2	7			3		4			5		5	5	1		5	4	3		3		5		1	4	1	2	5		9
Lycodrilidae
Lycosidae	19	21	78	1	46	80	40	74	3	64	76	37		46	11	26	79	49	31	88	9		37	19	22	8	18	62	19	52	61	24	5	102	22	21	48	48	21	48		32	69	7	41	49		68	2
Lyctidae			5	1	2		2	3	2	3	6	2			1	3	4	1	2	4			5		4		1	2		2	3	2		4	4	3	1	1		1				1	2	1		3	1
Lygaeidae	64	99	133	159	102	181	62	131	112	128	133	64		68		88	237	67	4	202	11		84		2	1	1	221	1	168	135	33	1	224	2	3	60	46	79	59		96	147	54	92	54		103	11
Lymexylidae			2		2	1		2		2	3	2		3				1		2								1		1	2			2				3		3					1	1		3
Lymnaeidae	3	10	11	3	10	9		8	2	12	14	8	4	7	7	2	8	7	4	13	4		10	5	3	1	1	11		6	10	9	2	7	3	3	5	8	8	11			9	2	10	10		11	2
Lynceidae											1	1																			1															1		1
Lyonetiidae		1	15	1	8	8	8	9		14	15	8		7			11	9	4	18	1		9	3	5			5	1	7	14	5		17	5	5		6	4	8			6		8	8		13
Lypusidae		3	10	2	6	2		7		7	7	6		4			8	4	4	10			4		1					3	6			9	1	2		5	3	5			1		6	5		5
Lytocestidae		1	2			2				3							1	2		1			3					2			3	1						4		4						1		3
Machilidae		4	22	1	2	11		38	1	6	13	3		3	7	3	53	2	5	33			6		4	2	2	14	1	10	5	4	1	45	4	5	2		4		2		3	3	5	2		6	3
Machuellidae																	3	1					1					1			1			1														1
Mackenziellidae											1					1																														1
Macrobiotidae	1	1	16		1	7		12	2	10	11	5	7		3	3	16	12	6	11	6		14		20			19	9	11	23	10	11	38	20	20									3	18	17	18	1
Macrochelidae
Macroderidae			1			1	1				1	1					1			1			1								1			1														1
Macromiidae																	1			1
Macronyssidae
Macropodidae																							1
Macrosternodesmidae				1	2						2	2								2	1		2	2						1		2							1						2	1
Macrostomidae			7		1	1		3		3	13	2		3			7	14		7			4				1				1	2	1	20									3		4	1		16
Macrothricidae	1	4	9		9	2		9		12	12	8	1		2		8	10		11			11	7	1			5		1	6	7	6	9	1			11		11		1	2		9	10	1	12	1
Malachiidae	10	21	39	18	9	26	9	47	17	30	30	11		1	29	78	104	6	21	75			17		35	1	5	47	15	22	39	1	1	69	35	43		2	1	2		1	11	12	15	4		27	2
Malaconothridae			8		1	2		2		5	4	1					10	5		1			8								3			2											4	5		11
Malawispongiidae																																											3
Mantidae		5	1	3	1	3		1	7	2	1				5	8	12		5	6					6	6	3	6	5	4	1			6	6	8						1	3	3				1
Mantispidae		3	1	1		3		2		1	1				1		3		2	2					1	1	2	3	1	2	1			3	1	3							1
Margaritiferidae			1		1					1	1	1		1			2	1		2			1	1								1						1	1	1						1
Margarodidae			3				2	4		4	6	2				1	5	1	2	15			2		2			4		3	2			10	2	5							1		4			6
Margelopsidae					1						1									1																									1	1
Mastigophorophyllidae			4	2		3	2	2		5	4			1																3	2			11				1		1		1						6
Mazocraeidae																																		1
Mecistocephalidae			1	1																										1	1			1														1
Meconematidae			2	1	2	2	1	2		2	3	1		1		2	5		2	3	1		2		1			1		3	2	1		3	1	2	1	1	1			1	1		2	1		1	1
Mecynostomidae											2						1
Meenoplidae						1			1							3												2						1		1
Megalodontesidae
Megamerinidae			1					1		1	1	1						1		1			1								1			1														1
Megascolecidae			1					1			2					7	4	2	1	6			9		2			1			1			2	2										1			2	3
Megaspilidae			6		6			5			22	26				2	7	4		27			48							1	15		3	41		1	1		1			9			2	3	1
Meinertellidae						1			1						2	1	13			1					1			1		1				2	1	2								1
Melandryidae		1	32	24	15	10	22	25	1	27	28	19		16			19	18	9	33	1		17	4	4			10	1	22	26	5		31	4	7	6	9		19		8	5		15	19		28
Melanopsidae		1	3	2		4			1						1		5									1	1	3	1	3	4			1									1
Melitidae																1														1				2
Melizoderidae
Meloidae	3	32	32	32	8	53	8	22	18	27	17	6		5	11	9	59	4	13	40			10		17	14	27	81	20	45	43	3		47	17	38	6	6	3	5		13	40	7	9	4		17
Meloidogynidae			3		8				4		10			3		5	8			7			6					3			5			10		3		2		2					8	2		5	2
Melolonthidae		11	19	5	9	17		7	3	5	7	2			5	16	124		9	35			4		15	9	7	53	13	10	15			44	15	23							8		3			6
Melyridae						1			1							3	4														2					1
Membracidae		3	3	3	3	3	1	3		3	3	2		1			4	1		4			2		1			3		3	3			3	1	4		1		1		3	3		2	1		3
Mengenillidae															1	2	2			1					2					1				2	2	3								1
Menoponidae	3										103				3	2	66	66							16						76			49	16													86
Mermithidae			12	1							5									4			2
Meropidae	1	1	1	1	1	2	1	1	1	1	2	2			1	2	1	1	1	2	1	2	2		1	1	1	2	1	1	1	1		2	1	1			1			1	1	2	2			1
Merothripidae																	1			1																													1
Mesocestoididae			1			4	1			2	2	1					2			1			1		1						1		1	7	1			1				1						3
Mesoniscidae			3								1																				1			3								1
Mesoplophoridae												1					1			1								2			1																	1
Mesopsocidae			4		3	1		5	5		4	2				6	5	2	1	7			3		1	1		4			4	2	1	6	1				3	3			1		3	3		4
Mesotretidae						1		1			1						1			1											1
Mesoveliidae		1	1		1	2	1	1		1	1	1		1		1	1	1		2			1					2		2	2	1		2				1	1	1		2	1	1	1	1		1
Messoracaridae
Metacrangonyctidae															1
Metadilepididae						1	1										1																									2
Metagynuridae
Metaingolfiellidae																																		1
Metastrongylidae		3				3					3			3			3			5			3		1									5	1													4	3
Metateratocephalidae					1					4	3			1	1		2								2						3			2	2			1							1			4
Metidae																				2			1											1											1	1
Metrioppiidae			4			3		1		3	2	4					4	2		1			1					1			3			3											1	1		4
Metschnikowiidae
Meyerellidae					2						3	1											1		2						4	3		3	2	2				3					2	1	1	2
Micreremidae			1								1						2	2		1											1			1											1			2
Microcerberidae						2																												1									1
Micrococcidae									1																2					1				2	2
Microcodidae
Microcotylidae			1																																											1		1
Microdispidae
Microgyniidae
Microhydrulidae						1														1
Microhypsibiidae								1		1								1					2									2	1	2												1		1
Microlaimidae					1						1			1				2													1			2											1	1		1
Micromalthidae			1																			1
Microparasellidae						5									1		7		1	8					2		1	8						3	2								4
Micropezidae		1	4		1			10		10	13	9		2			6	3		5			4								9			3				1							1	6		1
Microphallidae						11		1		1	16	1		6		4	5		2	18			18	5							1	5	7	3				8		3						3		3
Microphoridae			5			3		7	1	5	6	2		1		1	6	2	2	6			3		1			5	1	1	4	2		8	1	2		3					2	2	3	1		4	1
Microphysidae	2	1	6	3	5	9	2	3		7	8	5		4		3	9	5		9			6		1			2		4	4	3	2	9	1		1		4	2					6	4		5
Micropsammidae											1									1
Micropterigidae		3	14	4	5	4	3	13	1	8	11	7		5	1		6	4	3	14	2	1	5	2	2		1	7	1	7	6	4		26	2	4	1	5	2	5			4		7	5		8
Microstomidae			1		1	1		3		1	3	3		2			1	2		4			2								1			2				1		1			1		1			3
Microtrombidiidae			22		1			30		4	22					1	17			26			7		4			2	1		12	3	1	22	4	4									3	17	1	28
Microzetidae			4			4					1						8			4								4			2			3														1
Mideidae
Mideopsidae
Milacidae		2	5	3	3	9		4	2	2	5				3	1	4		2	6	3	1	4	3	3	4	6	5	3	16	2	4		7	3	3	1		1				6	2	5			2	1
Milichiidae	9		6		6	3		18		21	13	6			3	10	15	11	2	8			18							1	23	2		9										1	4			17	3
Millieridae		1	1					1		1	1						1		1	1								1		1	1			1									1
Milnesiidae			1			1		1		1	1	1	1			1	1	1	1	1	1	1	1	1	1			1		1	1	1	1	1	1	1									1	1	1	1
Mimetidae	1		4	1	4	4	1	4		4	4	3		2	2	7	5	3	5	5	1		4	2	1		4	5	3	4	5	2		6	1	2	3	1		2		1			4	1		4	3
Mimidae											1										1		2									1													1
Miraciidae				1		13					3						1	3		4			4											8		1									1	1
Miridae	107	146	329	180	230	356	177	280	119	314	334	194	1	179	7	96	525	187	20	482	2		224		29	2	17	349	56	264	280	123	2	409	29	54	117	123	214	152		188	242	34	241	175		268	17
Miturgidae	1		10		6	12	2	6		10	11	4		4	1	4	12	3	8	14			3	2	3		6	4	1	5	14	2		14	3	4	1	4		3		6	11	2	3	3		7	4
Mochlozetidae			1			1					1						1			1											2			1														1
Moerisiidae						3														2														1											1
Mogoplistidae		1	1	2		1			1						2	2	4	1	3	4	1		1		4		4	4	1	4				3	4	3							1	1
Moinidae		1	3		4	3		4		5	3	1		1	3		4	1		3			3		2			3			6			6	2	1				2		3	2		3	2		3
Moitessieriidae																	25		1	37					2			1						1	2
Molannidae			3		2		4	2		3	4	3		3				5		2			2	1								1						2	1	3					3	3		3
Molineidae		2	1		2	6	7	4			5			3	1		17		1	19			8		2			3			9	1	2	17	2	2		1							8	2		18
Molossidae		1				1		1							1	1	1		1	1		1			1		1	1	1	1				1	1	1							1	1
Momoniidae
Momphidae	1	1	16	3	14	6	8	15	1	16	15	14		15	1		10	14	2	16	6		15	4	3			7	2	5	16	9	1	13	3	4		10	8	14		1	2	1	15	10		15
Monhysteridae			14		6	2		7		16	25			5	1		2	1		3					6			1			23	1	3	18	6	3		4				1			12			11
Moniliformidae			1			1		1			1				1		1		1				1								1			1								1						1	1
Monocelididae						1					5		1				3	2		2										1			1
Monodellidae															1		1											1		1				2		1
Mononchidae			9		4			6		9	19	2		4			2	2		1			2		4			1		2	12			9	4	3		1		1					5			20
Monorchiidae		2	1			2				4	6	1						1		2			2								2			1				8		5						1		8
Monotomidae		2	24	13	16	7	16	21	2	22	23	21		13	2	10	19	21	11	28			22	1	15			11	5	14	18	12		27	15	13	6	12	2	9		2	3	4	21	19		22	3
Mordellidae	1	35	67	35	5	71	1	49	20	56	79	6		7	17	6	68	12	9	81			9		4		6	57	16	62	95			68	4	17		1			2	1	41		17	4		54
Moronidae						1			1		1				1		1		1	1					1	1	1	1	1			1		1	1	1									1
Motacillidae	6	8	11	8	11	10	9	10	12	10	13	12	8	10	10	9	10	13	7	13	9	9	15	6	8	8	9	10	9	9	10	12	10	10	8	9		10	8	10		9	8	10	13	13		13	4
Mugilidae		4		2	3	4			2			3		1	5		5	1	3	3		3	3		4	5	5	5	5	2		3		4	4	4								1	3	3		1
Muridae		16	22	21	13	24	17	16	4	16	18	12	3	14	5	3	17	16	4	22	5		10	3	4	3	6	20	5	22	18	5	4	17	4	5	10	13	12	13		16	21	4	14	15	1	18	3
Murrayidae			2					2		4	3	2	3				5	3	1	5			5		2			1			6	1	5	9	2	3									1	2	3	3
Muscicapidae	2	5	4	4	4	5	4	4	5	4	4	5	3	4	3	3	4	4	3	4	2	2	4	2	3	5	5	6	5	4	4	3	3	5	3	3		4	4	3		4	4	4	4	4		4
Muscidae	22	73	315	11	199	209	64	260	34	291	333	225	21	76	35	67	252	295	120	317	33	1	279	123	28	8	17	133	48	76	216	153	28	281	28	73		36	8	107	1	23	36	36	165	300	9	279	29
Muspiceidae																				2																									1
Mustelidae		5	9	7	8	8	9	6		9	8	8		9	2		9	8	2	9	1		7	5	2	1	2	6	3	7	8	5	1	8	2	2	6	8	7	9		10	7	1	8	8		9	1
Mutillidae		17	20	14	2	35	4	11	24	16	11	1		2	1	3	59	3	23	38		2	3		25	6	11	47	17	35	21	1		51	25	35					1	2	25	13	2			7
Mycetobiidae			1		1			4		2	3	3					1	1					3								3	2		2											1	1		1
Mycetophagidae	1	7	16	11	10	12	12	15	1	14	16	11		9	1	2	16	11	7	22	2		13	2	13			10	1	12	16	2	1	20	13	14	3	10	1	14	1	7	5	1	10	9		14	1
Mycetophilidae	6		342	43	186	250	56	468	58	499	567	255	12	382	13	39	208	542	127	372	75		463	86	25	5	5	116	55	137	284	215	19	254	25	18	3	48	4	256			9	21	240	376	4	377	8
Mycobatidae			13			4		6		3	6	2					21	6		5			8							1	9			10											4	4		11
Mycteridae								1			1				1		2						1		1			3			2			3	1	2				1
Mydidae																	2		1						1										1	1
Mydonomidae			4		1			4		3	5	1		1			16			1											5			4											6			7
Myerslopiidae
Mylonchulidae			2		2			1		1	7			1						1					2					1	7			6	2	1		1		1		1			7			17
Mymaridae			133		64	39	2	29	1	23	106	20				1	12	25		33			90	3	1			16		4	6	10	1	50	1	2						4	5		79	11		62	1
Mymarommatidae					1	1		1		1	1	1					1			1			1								1			1														1
Myobiidae
Myocastoridae			1		1	1		1		1	1						1			1					1			1		1				1	1	1			1				1		1
Myocoptidae
Myolaimidae			1							1	4												1					2			3			1											1
Myopsocidae																1	1			1								1						1															1
Myoxidae		2	4	4	3	4	4	4		4	4	1		2	1		2	1	2	3			2		2			4	1	4	3			4	2	3	2	4	3	4		3	3		2			4
Myrmecolacidae																	1
Myrmecophilidae			3	1		2				1	1				1		2		1	2					1	1	2	4	1	3	1			4	1	2			1				1	2				1
Myrmeleontidae		9	8	5	2	16	1	12		7	6	2		2	1	8	24	2	5	19			1		18	1	6	24	2	17	16			26	18	21	2	1	2	3		6	7	9	2	2		9
Mysidae			1		3	1					5	3		6	1		1	4	1	2			3	3	2			3		3	1	3		6	2	2		4		2	1	3			4	3	1	3
Mysmenidae			2					1		2	2					1	2		1	3											1			3		1	1								1			2
Mythicomyiidae			1			1		1		1		1				5	9	1	2	3					2		1	4		1	1			17	2	5									1	1
Mytilinidae
Nabidae	8	14	17	13	13	17	12	16	6	17	16	13		11		8	23	11	1	27	1		12		4			15	1	19	14	9		18	4	5	11	10	10	8		11	14	6	13	8		15	2
Naididae		1	35	25	24	35	36	34		40	44	27	6	41	1	10	40	31	6	47			34	15	18			12	2	19	34	18	8	44	18	11		29	17	34	1	35	11		44	28	1	44	4
Nalepellidae
Nanhermanniidae			6		1	1		1		5	5	2					5	4		3			4								4			3											3	2		5
Nannodastiidae															1															1														1					1
Nanophyetidae						3					2						2			2			1								1
Nanophyidae		1	10	5	2	11		6	1	8	9	1		3	6	3	20	3	8	24			2	1	15			11		13	15	1		17	15	17		1		2		2	2	2	3	1		7
Nanorchestidae			1							1	1							1		2		1	3									2		2		2									1	1		1
Naucoridae		1	1	1	2	1	1	1		1	1	1		1			2			2			2		1			1		1	1			2	1	1	1	1	1	1		1	1		2			1
Neanuridae	2	29	45	15	11	19	2	29		34	33	20	4	1	5	7	85	19	19	90			29	13	11		6	22	11	13	29	18	9	49	11	15				8		6	1	6	15	27	6	53	3
Necopinatidae																																		1		1
Neelidae			1		1			1			2					1	1	2		6			1								2	1		2		1										1		3
Nemasomatidae
Nemastomatidae
Nematalycidae																				2
Nematotaeniidae			1		1	1		1		1	1				1	1	3		1	1	1		1		1			1						2	1	1		1			1							1
Nemesiidae						4			1						7		16		7	9					8			4	2	5	1			12	8	5							2	1
Nemestrinidae			2			1			1								8			4						2	1	6		2				1		3						1
Nemonychidae			3		3	2		3		3	3	1		1			2	1		3			1					1			3			3				1		2		1			2	2		3
Nemopteridae						1			1								4			1							1	2															1
Nemouridae	14	1	33	18	17	28	4	30	1	32	33	9		6			35	14	2	44	1		11	3	1	2	1	19	2	6	19	6		47	1	12		9	19	15			28		13	13		33
Neoacaridae
Neoatractosomatidae			3	2				3			1								3									2						12		1							2
Neobisiidae		11	24	28	5	21		15	1	6	11	2	1		10		69	2	11	51	3		6	4	28	3	7	31	12	55	17	5	1	69	28	13				2		2	21	3	4	2		14	2
Neodiplogastridae			17		1			5		6	56	4		2			4		1	1			4		1						16			12	1			4		1		1			6			6
Neoechinorhynchidae		1	1	1		1		1		1	1							2		2			1		1						1	1		2	1			1		1						1		1
Neoephemeridae						1														1																		1					1					1
Neogosseidae										1	2									2			2	1	1									1	1													3
Neothrombiidae			1	1	2	1					1					1				1														2											1			1
Neotrombidiidae										1																		1
Neotylenchidae			1							5	5			1		1	1														6			1				2							3			3
Nephilidae					1
Nepidae	2	2	2	2	2	2	2	2		2	2	2		2			2	2	1	2			2		1			2		2	2	1		2	1		2	2	2	2		2	2	2	2	2		2
Nepticulidae	1	7	133	19	71	64	7	114	13	132	113	85		63	6	13	111	66	44	152	18	1	99	3	24		28	109	19	113	118	57		153	24	39		73	10	64	1	20	33	4	84	70		100	1
Nerillidae			1					1			1							1		1											1			1														1
Neritidae		2	4	3	1	3		1	1	2	3	1		1	1		5	1	1	1			1		1	1		5	2	3	4	1		2	1	1		1	1	1			2		1			1
Nesticidae			3	5	1	3		2		1	2	1		1	1	2	4	1	1	2			2	1	1			2	2	2	1	1		8	1	2	1			1			1		1	1		1	1
Nevrorthidae		1		1		1													1						1			1						2	1	1							1
Nicoletiidae		1	2			2		1		1	1				1	1	6	1	2	4					2	2	1	3	1	1	2			4	2	5					1			2				1	1
Niphargidae	3		9	15	6	9		7	1	5	15						5		1	22			4	1	1		1	3		32	7	1		34	1	1			2		1	3	14		4			4
Niphocepheidae			1			1		1									1			1														1
Nitidulidae	86	118	134	136	101	133	109	131	39	122	126	86	1	77	46	29	144	85	58	154	25	31	80	53	60	42	51	132	35	143	124	59	7	166	60	74	65	80	75	89	51	102	116	21	88	75		116	14
Noctuidae	268	259	498	512	335	575	298	500	163	432	468	372	42	330	100	95	615	393	253	616	236	74	353	171	262	49	65	516	168	507	446	218	30	630	262	330	155	327	249	325	3	345	516	121	327	312	1	435	30
Nolidae	6	7	17	14	13	24	12	18	7	17	18	14		13	3	2	24	12	14	23	8	6	9	1	14		2	22	10	15	17	4		22	14	17	3	14	7	14		12	14	4	12	12		16
Nordiidae			10		3			5		7	7		1				18			1			1		2						14		1	17	2	9									9		3	16
Nosodendridae		1	1	1		1	1	1		1	1	1								1										1	1			1									1		1			1
Noteridae		1	2	2	2	2	2	1	2	2	2	2		2	3		3	2	1	3	1		2	2	3			1		3	2	2		2	3	4	1	2	2	2		2	2		2	2		2
Nothridae			8		1	4		1		5	6	4					6	5		5			6					1			5			7											4	5		6	1
Notocotylidae			3		2	13	1	1		7	12			1		2	5	6		3			11					1			8	1	3	4				5				2			1			9
Notodontidae	18	19	36	33	32	37	29	35	6	38	35	31		29	2	1	38	26	13	38	19	1	27	9	11		1	28	1	31	35	16		37	11	21	23	31	33	30		17	26		31	25		36
Notodromadidae			3		1	2	2	2		1	3						2			3			2					1		1	3	1		2									1		1	2		3
Notommatidae
Notonectidae	2	6	7	3	6	5	4	6	4	4	6	5		3		4	8	4	2	6			4		1			8		7	7	4		7	1		6	2	3	3		2	5	3	6	3		6
Numididae										1						1				1
Nycteribiidae		7	7	4	3	9		11	4	8	8	2		1	5		9	2	6	11			3		7			8	2	8	7	2		9	7	7							7		4	2		7
Nygolaimidae			5		2	6		4		6	9			2			18						2		2						11			9	2	1		1				2			11			8
Nymphalidae	50	76	104	86	53	95	49	96	19	70	92	42		54	11	16	96	60	30	123	23	13	32	16	25	9	21	89	15	82	70	20	4	124	25	44	61	58	53	57	1		90	18	40	50		75	4
Ochodaeidae										2	1						4			1					1			3		1	3			2	1							2						2
Ochotonidae
Ochteridae				1		1			1								1			1								1		1				1									1
Ochyroceratidae											1
Ocnerodrilidae											1					2	2								1									1	1
Octochaetidae											1					2		1					1											1
Octomacridae						1				1																												1										1
Odiniidae	1		4		1	2		8		7	9						5	5		2			7								9	2		3				1		1					1	1		6
Odobenidae																																	1													1	1
Odontellidae		5	5	4	1	2		5		1	7	2				5	14	2	1	17			1						2	3	5		1	6		1				4				1	2	2	3	9	2
Odontobutidae
Odontoceridae	1	1	1	2	1	1		1		1	1	1					2			1			1	1				2		1	1	1		1		1		1	1	1					1			1
Odontolaimidae											1						1								1						2			2	1										1			1
Odontopharyngidae			1							1	1																							1				1										1
Odontophoridae																			1	2			1									1		1															1
Oecobiidae	1		1		1	1		1			1				1	37	5		2	4			1		2	2	4	4	2	1				4	2	3				1			1	2	1				4
Oecophoridae		21	47	20	24	26	10	37	6	39	40	24	2	19	2	1	53	17	11	58	10	4	23	5	13	4	5	34	9	24	38	9	2	48	13	17	2	18	12	19		6	23	3	27	18	1	31
Oedemeridae	12	20	32	18	11	30	13	27	7	26	25	10		12	9	9	45	10	17	37		5	10		12	7	8	39	11	32	27	3		37	12	21	3	12	5	13		2	17	5	12	10		23
Oehserchestidae
Oestridae			3		8	1		11	1	13	14	5			1	1	5	2	3	15			10		6	1		1	1	1	13	5		11	6	7		9							10	4		14
Oleacinidae		3		1																					1			3	1	1				2	1	1
Oligacanthorhynchidae		1	6			4	2				2						4						1		1						2			4	1			1				1						2
Oligoneuriidae		1	1	1		3		1		1	1						4			2								1		1	2			1				1					2					5
Oligotomidae		1				1									1	2	2		1	1					1	1		1	1	1				1	1	1
Olindiasidae			1		2	1		1		1	1			2			1	1		3		2								1	1	1		1			1								1
Ologamasidae
Olpiidae				1		1			2						2	7	2		1	2					3	1	4	4	3	1				4	3	5								3
Omalisidae			1	2	1	1	1	1		1	1						1		2	5					2			1		4	1			5	2										1			1
Omphalometridae						1		1		1	1						1			1			1								1							1										1
Onchidiidae																	1		1	2			1																										1
Onchocercidae		3	2		1	7	2	4	1	1	11	1		2	1		24		2	21			9					7			3		3	15		3		1		1		4				1		19	1
Onchulidae											3																				2			2											1			1	1
Oncopoduridae		1	4	3	2			1			2						7			8			2				1		1	2	2			2		1											1	3	1
Oniscidae			2		1	1	1	2		1	1	1	1	1			7	1	1	2	1		1	1	1					1		1	1	7	1		1	1	1	1		1			1	1		1
Oniscodesmidae			1					1			1	1																			1														1			1
Onychiuridae		3	70	18	4	20		53		23	34	24		1			60	13	2	37			61						1	10	34		14	41		1			3	2		3			1	33	8	50	1
Oonopidae			2		3	5		3	1	2	7	2			3	4	8	1	5	14	2		5	1	5		2	5			1	3		9	5	1	1		1		1			1	5	1		2	2
Opecoelidae		4	1			4		2		2	6	4			1		1	1	1	2			4								2	1		4				5		3						2		7
Opetiidae			1		1			1		1	1	1					1	1		1			1	1							1	1		1					1						1			1
Ophioptidae
Opilioacaridae																									1		1	1	1					1	1	1
Opisthocheiridae					1											1	14			17																1
Opisthorchiidae		1				8	4	3		5	10			2			6		1	2			3								7			9				5		2		3			2	1		9
Opomyzidae	10	4	16	4	10	10	3	15	1	21	21	13		10	1	1	13	12	1	15			16		5		1	4		5	9	8	1	15	5	5	2	7	3	5			4		14	13		12	1
Opostegidae		1	4	3	3	3	1	3		4	3	3		3			5	3	2	6	1		4	1	2			4		2	4	2		3	2	1		3		3	1		3		3	2		3
Oppiidae			38		6	10		13		15	24	6				2	156	23		10			37					18			37			42											10	4		38	1
Orchipedidae			1			1					1						1						1								1			1														2
Orculidae		5	13	4	1	4		3	1	2	4						2			5					1	1	3	8	11	6	4			10	1	1	1		1				4		1			3
Oreellidae
Oribatellidae			13		1	4		1		5	7	3				2	21	2		4			3								13			25											1	3		14
Oribatulidae			19			11		8		6	12	4				2	60	14		17			13								21			25								1			7	4		20
Oribotritiidae			3		1	1		1			2	3					5	5		4			2					2		1	4			8												2		2
Oriolidae	1	1	1	1	1	1	1	1	1	1	1	1	1	1	1	1	1	1	1	1	1	1	1		1		1	1		1	1	1	1	1	1	1		1	1	1		1	1	1	1	1		1	1
Oripodidae																	2			2														1
Ormyridae			3	1	1	2	1			7	14					1	8	1		5			4		1			1		6	12			2	1	4						4	5
Ornithostrongylidae																	1						1											1
Orphnidae		1				2											3											3			1			2		2							2
Ortheziidae			5		3	2		4		5	6	3	1			1	5	3	4	5			5					1		2	4	3	1	5		1			1	1					3	1		5	2
Orussidae
Oryidae																	2
Osmeridae					1						1	1		1				1	1	1	1		1	1								1						1		1					1	1		1
Osmylidae		1	1	1	1	1		1		1	1	1		1			1			1			1					1		1	1	1		1			1		1	1			1		1			1
Ostellidae					1					1	1						1																									1			1			1
Otididae		1	2	1	3	2	2	3	1	3	3	3		2	1	2	3	3	1	3		2	3		1			3		1	3	2		2	1	1		2	1	3		2	2	2	3	2		3
Otinidae																	1			1			1									1
Otocepheidae										1										1											1
Otomesostomidae			1					1		1	1	1		1				1					1									1	1	1						1						1		1
Otoplanidae						1					3							1																														1
Oxidae
Oxychilidae	7	13	18	10	8	18	5	17	7	17	18	7	5	6	4	7	20	7	12	23	7	3	7	6	5	6	6	19	13	20	14	7	4	35	5	15	11	5	11	7		6	7	2	8	8		18	19
Oxycorynidae																1
Oxyopidae			1		3	3	2	2		1	2	1		1		1	6	1	2	4			1		2	2	4	6	1	3	3			4	2	4	1	1	1	1		2	3		2	1		1
Oxyuridae		1	4		2	10	8	2			4	4		2	5	1	15	2	3	13			9		1						11	2	3	13	1	4		10		1						1		9	3
Pachylaelapidae
Pachyneuridae																		1
Pachypodidae																			1						1									1	1	1
Pachypsolidae																																		1
Pachytroctidae									1							2	2			1			1					1
Palaeacaridae			1															1					1								1																	1
Palaemonidae																	1										1	1	1	1				1
Palingeniidae						1				1	1																			1	1												1		1
Pallopteridae	6		16	1	7	6		15	1	14	15	7	1				8	12	4	11			13	7		1				2	10	10	1	14		4	3	2	1						9	13		15
Palpimanidae		1							1							1	1								1	1	3	2	1	1				1	1	1								1
Paludicellidae			1		1		1	1		1	1	1		1				1		1			1	1	1						1	1		1	1				1	1					1	1		1
Pamphagidae				1		4			1							5	23			1					1		2	7	1	1				3	1	6							2
Pamphiliidae		4	41	3	34	16	1	34		41	48	28		26			8	34		37			21		2					24	28	7		40	2		1	5	11	24		1	3		37	26		22
Panagrolaimidae			5		2			1		7	32			2	1	1	4			1			4		1						16			10	1	3		1		1					4		1	6
Pandeidae											2	1						2					2										1												1	3	1
Pandionidae	1	1	1	1	1	1	1	1	1	1	1	1	1	1	1	1	1	1	1	1	1	1	1	1	1	1	1	1	1	1	1	1	1	1	1	1		1	1	1		1	1	1	1	1		1	1
Panopistidae						1									1		3			2											1			1														2
Panorpidae	2	3	5	5	5	4	3	5		3	5	3		4			3	5		6			3					4	1	5	5	1		7		2	4	5	3	6			1		5	3		5
Papilionidae	4	7	6	6	2	6	2	5	2	5	6	4		3	1		5	3	3	8		3	2		2	3	3	8	3	6	4			7	2	6	3	3	2	3	1		7	2	2	3		5
Papillodermatidae																	1
Parabathynellidae						5		1							1		18		1	1											1												1
Parachelaincertaeseidae																															1																	1
Paradoxosomatidae		3	3	6	1	4	2	2	2	2	3	2			4	3	5	1	1	2			2	1	1		2	7	2	7	3	2	1	12	1	4		2	2	2	2	2	2	3	1	1		2
Paradoxostomatidae																		2																												1		1
Parajapygidae																				1							1	1						1		1								1					1
Parakalummidae			3			1				1	1						1	1		1											2			1												1		2
Paramphistomidae		3	2	1		5	2			4	6	2		1			1	2		5			3	1				2		2	6	3		4				2				1			3	2		2
Parantennulidae
Paraphelenchidae						1				2	1			1			1						1								2							2							4			4
Parasitaphelenchidae			5			2				3	36						3	1		5			3			2		5		1				5				1							1	1		3
Parasitidae
Parasitylenchidae											5	1								7			1
Parastacidae																	1
Parastenocarididae			5			8		1		7	12	3		1		2	4	4	2	14		1	2		11		2				6		1	14	11	2							12		6	3	1	3
Parastrachiidae
Paratydeidae
Paratylenchidae			3		10				6	13	6			3			10			1			1								3			15		5		5				2		4	12	1		15
Parergodrilidae			1							2	2									1										1				2														1
Parholaspididae
Parhypochthoniidae			1					4			1							1																														1
Paridae	5	7	7	7	6	7	7	6	2	6	7	7	1	8	4	1	5	8	3	7	3	3	6	3	3	2	3	7	3	7	7	4	1	7	3	5		7	6	7		5	7	2	6	7		7
Parmacellidae																5	1			1		1
Paronellidae			1													3	1												2	2				1
Parulidae											1		2			1				4	2		17									8	11												1				1
Paruterinidae		2	3			19	5	2		9	8	2			1	1	10			8			4					1			9		1	15				1		1		8						3	1
Parvidrilidae																									1									1	1
Passalozetidae			6			2					1					3	18	2		3			3					1			2			5									1		1			3
Passandridae
Passeridae	4	5	4	4	2	5	2	5	5	2	4	2	2	2	4	4	5	2	5	5	2	4	4	2	3	4	5	5	3	5	3	2	2	5	3	3		2	3	2		3	5	4	3	3		3	2
Patulidae	1		3		2	2	1	2		3	3	1		2	1	9	2	2	1	2	1		1		1					1	2	1		2	1	1	2	2	1	2		1		1	1	2		3	1
Paurodontidae											1
Pauropodidae	7	1	20	14	24			16		15	13	4					24	7	28	48			20		11		7	23	3	2		2		25	11										6	6		1
Pectinatellidae										1	1									1																									1			1
Pediciidae	3	7	37	6	16	23		34		37	36	14	2	4			3	19	12	27			19		2			1	1	3	11	15	1	34	2	4		16	1	8			5		12	18		29
Pedicinidae																						1
Pediculidae								1			2							2							1									2	1													2
Pediculochelidae
Pelecanidae		2	2		2	2	1	2	2		2	3		1	1	1	2	1		3			1			2	2	2	2		1			1				1		2		2	2	1	2	2		3
Peleopodidae		1	1	1	1	1	1	1	1	1	1	1					1	1	1	1	1		1	1	1			1	1	1	1	1		1	1	1	1		1				1		1	1		1
Pelobatidae		1	1	1	1	2	1			1	1	1		1			1			2								1		1	1							1		1		1	1		1			1
Pelodytidae																	2			1														1
Peloppiidae
Pentatomidae	3	57	61	65	39	85	38	56	44	52	51	33		28		33	96	27		95	2		24					85	1	71	66	7		97		2	24	33	33	29		50	75	23	32	18		48	3
Penthaleidae			1					6			2						1			2			4									1	1	3		1										1	1	1
Penthalodidae			1					2				1								1			2											2													1	2
Percidae		1	6	2	3	8		4	1	7	6	3		3	2		2	3	4	4			3		3	1	1	1	1	4	7	1		3	3	3	1	3	1	3		3	1		3	3		3
Perilampidae		1	4	1	2	4	1	1	1	20	43						8	1		10		1	10					1		11	19			9		2		2				7	2		2
Peripsocidae			5		6			5			5	3				3	6	5		7			7					3		5	5	4		5					5	4					5	4		5	4
Periscelididae	1		2			1		4		3	6						1	3					5								3			1														2
Perlidae	3		7	6	6	7		7	1	8	9	1					9	1		9			2					6	1	3	7	2		8		3		1	4	1			8		4	1		10
Perlodidae	7	1	19	13	9	16	1	15		18	22	5		5			15	8	2	21			5	1	1			4		6	10	3		18	1	2		5	5	8			17		4	8		18
Perlohmanniidae			3									1					1			1			2					1			2			1														1
Petromyzontidae		2	2	3	3		1	2		4	4	3		3	2		2	3	3	3	2	2	3	2	4	2	2	2	2	3	2	2	1	4	4	4		3		3	2			1	3	3		3
Phaeomyiidae			3	2	3	1	1	3		3	3	2		2			1	2		2			2					1		1	3			3				2		1					2	1		3
Phaethontidae																1																																	1
Phalacridae	5	5	23	15	3	13	7	25	8	21	23	17		12	12	6	30	15	17	28		1	16		24	1	5	25	6	18	18	7		34	24	27	2	9		10		1	2	12	18	9		23	1
Phalacrocoracidae	1	3	3	2	3	3	1	3	3	3	3	2	2	1	2	2	2	2	2	4	2	2	3	2	2	2	3	3	2	3	2	2	2	3	2	2		1	1	1		2	2	2	3	2		3	2
Phalangiidae
Phalangodidae
Phaneropteridae	1	17	17	22	3	42	1	8	4	11	7	1		1	4	1	14		7	12	1		2		7	6	6	49	5	23	19	1		25	7	8	3	1	3	1		9	27	7	2	1		11	2
Pharyngodonidae		6				4									8	4	29			15					1									13	1
Phasianidae	5	7	9	6	8	7	7	9	3	7	11	5	3	7	4	3	9	8	3	11	2	4	12	4	3	3	3	9	3	7	6	6	1	13	3	3		7	6	7		4	6	1	4	8		7	1
Phasmatidae																							4									1																	1
Phaulodinychidae
Phenopelopidae			21			5		5		8	11	4					24	9		6			13					3			12			21											5	9		16
Pheroliodidae																	2	1										1						1														1
Philodinavidae			2					1			2									1			2								2	1		3														1
Philodinidae			98		13	13		48			78				10	25	20	8		35			66		12		13				37	46	10	38	12					1					46	15	24	39
Philodromidae	11		29	1	18	32	12	26	1	24	30	14		13	2	9	41	14	19	42	2		16	5	10	2	12	28	8	23	23	7		36	10	6	17	13	1	14		8	26	4	18	16	1	24
Philometridae		1	2			3	1			6	1	2						5		4			2								6		1	1				5		6						6	1	6
Philophthalmidae			1			5					2						1			1			4								3		1									1				1
Philopotamidae	2	6	9	5	7	9		11	1	8	10	3		1	1	1	15	3	4	16	2		5	1	4	4	2	11	4	4	4	5		15	4	5	2	4	6	3			5		3	3		7
Philopteridae											226				6	2	102	174							29						165			115	29	1												196
Philosciidae	1	1	3	1	1	2		4	4	1	5	1		1	7	1	12	1	10	8			2	1	6	2	2	10	1	7	3	1		19	6	7		1		1				4	2	1		2
Philotarsidae			2		2	1		2			2	1					2	1		2			2					1		1	2	1		3					2	1					1	2		2	2
Phlaeothripidae		30	60	3	6	27	1	26	17	79	74	30		7		38	100	30	8	90			48		11			41	7	43	67	4	1	67	11	22		13		19		1	7		37	30		63	15
Phloeostichidae			1	1						1										1										1	1			1														1
Phloiophilidae			1		1						1	1								1			1								1	1													1
Phocidae		1			1	1					3	2	1	2		1		3		2	1		2	2	1	1	1	1	1	1		2	5		1			1		2					2	6	5	3
Phoenicococcidae																	1			1																1
Phoenicopteridae		1	1		1		1	1	1	1	2	1		1	2	1	2	1	1	2		1	1		1	1	1	1	1	1	1			1	1	1		1	1	1			1	1	2	1		1
Pholcidae	2		4	4	8	7	1	5		3	4	3	1		4	45	12	2	6	8	1		6	1	6	3	5	6	10	7	5	2		6	6	3	2	1	2	1		2	5	4	3	2		3	1
Phoridae		4	337	2	136	9	1	208	2	209	373	215	6	2	28	61	193	201		156			335							5	228	147	11	175		3		21	2				4	2	262	90		338	20
Phryganeidae		1	9	5	9	4	11	10		9	9	10	1	9			1	17		9	2		10	3				2		6	8	6	1	8			3	11	6	12		2	2		9	14		13
Phthiracaridae			19		1	6				9	15	8					22	12		8			14					5		3	15			17											6	4		25	2
Phyllognathopodidae			1			1		1		1	1									2			1		1									1	1	1												2	1
Phylloxeridae			1	1	2	1	1	1		4	9	2		1			3		1	5			3		1					3	2	1		14	1	5		1	1	2		5	1		4			4
Physalopteridae						4	1				1				5		7														5			7											2			5
Physidae	1	3	3		3	3		3	1	3	3	2		2	1	1	4	2	1	3	2		4	3	1		1	1		3	3	3		2	1	1	1	2	3	2			3	1	3	2		2	1
Phytoptidae			7	6		5			1	5	13	6		1			3	15		5			3					2		7	12	2		14		1		2	1	2			2		1	1		17
Phytoseiidae
Phyxelididae									1
Picidae	5	10	10	10	7	10	10	8	1	10	10	6	1	9	4	1	6	8	4	9	4	3	5	2	2	1	1	10	1	10	10	4	3	9	2	2		9	7	9		8	9	2	7	8		10
Pieridae	12	19	21	18	12	24	12	18	8	19	17	12		10	7	10	22	14	13	24	10	11	10	7	9	8	9	25	8	18	19	9	2	25	9	13	13	15	10	13	2		24	10	10	12		15	2
Piersigiidae
Piesmatidae			7	6	3	8	6	4	1	6	6	4		3		1	8	4		7			2		1			8		5	6	2		5	1	1	2	1	3	2		7	5	1	3	4		4
Pimoidae																	1			1														1
Pionidae
Piophilidae			2		1			14		16	12	4	1			1	1	12	3	9			5		1			2		1	6		3	4	1										7	5		8	1
Pipidae											1									1			1																						1
Pipunculidae			62	1	78	23		84		91	115	60		23		10	71	67	9	40			94				1	5	2	15	86	22		63		1		15		92			1		79	39		51
Pisauridae	1		3		3	3	3	4		3	4	3		3	1	3	2	3	2	5	1		3	1	3	1	1	4	1	3	3	2		7	3	2	2	3	2	3		2	2	2	3	2		3	1
Piscicolidae			5	3		1	2			3	11	1		1			1	1		4			1					1		2	4			3				2	2	1		2	2		2			18
Placorhynchidae											2	1					1	1		1													1												1
Plagiorchiidae		10	3		3	30	19	8		16	34	6			1		24	6		25			17					4			24	5	1	20				14		2		9			4	4		28
Plagiorhynchidae			3			6		2		1	3	1					2			1			2								1	1		3				1		1		1			1			1
Plagiostomidae								1			1	1		1				1		1			1									1		1									1					1
Planariidae			9	5	6	4		5		5	6	3	1				11	4	3	11			5		2			6	1	1	1	6		6	2			2	4	1			7		5	1		4
Planorbidae	2	20	20	6	15	17		18	1	20	23	14		14	8	4	18	15	8	21	6		17	11	8	1	1	20	4	12	22	12	2	20	8	8	10	18	13	18			21	5	17	13		21	2
Plataspididae		1	1	1	1	2	1	1	1	1	1	1					1			1								1		1	2			1		1	1	1	1	1		1	1			1		1
Plateremaeidae																															1			1
Platyarthridae			1	1	2	3		1		1	2	2			5	2	7	1	6	7			2		4	1	1	4	1	1	1	1		11	4	9							1	5	2			2	1
Platycnemididae		1	1		1	1	1	1		1	1	1		1			2	1	1	3			1		1	1	1	1	1	1	1			1	1	1		1	1	1		1	1		1	1		1
Platygastridae			24		8	1		21		1	47	163	1	36		13	90	55		64			126					12	1	2	66	26	6	22		2			3		1	39			11	58
Platypezidae	8		16		20	1		28	1	30	29	23		1		1	17	22	1	21	1		33	2	2		1	4		5	26	15		18	2			9							23	21		24
Platystomatidae	1	1	5		2	1		4	1	5	2	2				1	5	2	1	6			2		2		1	1	1	3	6			8	2	3							1		2			3
Plectidae			19		9	1				23	26	2		9			4			1			2		3					2	28	3		22	3	4		10		2		1			13		1	47
Plectonemertidae			1								2					2							2	1								1																	2
Pleidae	1	1	1	1	1	1	1	1	1	1	1	1		1			1			1			1					1		1	1	1		1			1		1	1		1	1	1	1			1
Plethodontidae																				1					4									3	4
Pleurodiscidae									1																		1	1	1					1		1								1
Pleuronectidae		1		1	1	1					1	1	1	1	1		1	1	1	1		1	1		1	1	1	1	1	1		1		1	1	1								1	1	2		1
Ploceidae
Plumatellidae			6		6	5	6	5		5	7	5		4		2	4	3	2	7			8	5	3			2		1	6	8	2	11	3				6	3					5	5	1	6	1
Plutellidae		4	9	2	4	4	1	8	1	7	9	7	3	5	2	3	6	8	3	11	2	2	7	3	3	1	1	5	1	5	8	5	2	8	3	4	1	4	3	8			5	1	3	10	2	7	1
Plutoniumidae				1													2								1					1				1	1	1
Pneumocoptidae
Pneumospiruridae																	1
Podapolipidae			3		3		1	1		1	26	1							1				1		1						9			6	1	2						2						7
Podicipitidae	2	5	5	4	5	5	5	5	5	5	5	5	4	4	5	4	5	5	3	6	5	3	6	5	3	2	3	5	3	5	5	6	5	5	3	3		5	3	5		5	4	3	6	5		5	5
Podocinidae
Podonidae																																										1
Podothrombiidae	1		9					10	1	4	8		1				8	1		8			3							1	6		3	6				1							2	6	3	9
Poduridae			1		1			1		1		1		1			1	1		1			1					1			1	1		1						1					1	1		1
Poeciliidae		1				1				1					1		1		1	1			1		1						1			1	1	1									1
Polyartemiidae																		1																												1
Polyaspididae
Polycentropodidae	1	5	17	10	13	10	7	18	2	13	17	12	3	10	1	1	15	14	4	22	5		13	8	6	5	1	9	6	7	14	11		24	6	7	7	12	9	12		1	3		12	12		16
Polycystididae			2	1				1		2	3	1		1			5	3	2	3			2									2		3						1						1		2
Polydesmidae		7	15	22	7	20	2	16		7	11	5	1	4	4	5	22	4	4	26	3		7	5	8	1	2	8	4	36	12	5	2	50	8	3		4	5	4	3	3	14	3	6	5		9	7
Polymitarcyidae		1	1			1	1	1		1	1						1			1										1	1			1				1	1	1			1		1			1
Polymorphidae			6			7	4	1		6	6	4		3				4		2			8								7	1	8	8				6		5		3			1	3	1	8
Polyphagidae						1			3							1	1								1	1	2	3	1	1				1	1	2							1	1					1
Polyphemidae	1		1		1	1		1		1	1	1	1				1	1		1			1	1							1	1	1	1		1		1		1					1	1		1
Polyplacidae								8			9							5																7														9
Polypodiidae
Polypterozetidae																																		1
Polystomatidae			1		1	6	4	1		1	3			1			7	1	1	4			2								3			2				3		1								3
Polyxenidae		1	1		1	1	1	1		1	1	1		1	1	3	1	1	3	3	1		1	1		1	4	3	1	3	1	1		3		1		1	1	1		1	2	2	1	1		1	1
Polyzoniidae		1	2	1		1	1			1	1	1		1				1		1			1							1	1			2				1		1		2	1					2
Pomatiidae	1	1	1	1	1	2		1	1		1	1			2	5	3		1	2			1		2			1		2	2	1		1	2	2			1				1	2	1
Pomerantziidae
Pomphorhynchidae		1	1	2		1		1		1	2	2						1		1			2					2			1	2		1				1		1						1		3
Pompilidae		39	100	66	69	64	30	73	66	92	97	51			8	25	123	56	78	145	24	1	43		61	1	15	91	9	14	18	1		130	61	77	2		33			1	5	28	59	28		58
Pontarachnidae
Pontocyprididae																				1
Porcellionidae		5	10	7	5			8	8	7	16	2	1	1	17	34	60	4	13	30			6	4	17	12	11	21	11	12	7	6	2	41	17	27		1	1	1		1		12	4	5		5	4
Potamanthidae			1	1		1		1		1	1						1			1			1					1		1	1			1				1	1	1			1		1			1
Potamodrilidae											1									1																												1
Potamonidae		1				1			1											1					1	1	1	2	1	1				1	1									1
Pratylenchidae			9		16	3			9	9	22	2		11		5	9	2		10			5		1			2		5	8			18	1			1		1		2			20	6		23	2
Praydidae		2	4	1	2	1	2	3	1	3	3	2		3	2	3	4	3	2	6	1	3	4	1	2	1	1	2	2	1	3	1		4	2	2	1	3	1	3			2	2	4	3		3	2
Prionoceridae																	1
Prionoglarididae					1			1			1									1								2	1
Prismatolaimidae					2					2	3			2			2	1													2			3				1		1					3		1	6
Pristilomatidae	2	13	5	11	2	11		4	4	5	5	2	1	1	5	3	5	2	3	6	2	1	3	2	2	5	11	34	6	14	5	2	2	11	2	2	4	2	2	2			12	2	2	2		5	2
Proalidae
Procampodeidae																									1									1	1	1
Procellariidae		3	4		7	2		2	2	2	7	7	5	1	4	8	9	2	4	9	6	9	10	4	3	2	2	3	2	4		9	4	8	3	5				1				4	8	6		5	6
Proctophyllodidae		1				22		41		18	23						5			8		1	27		6						4			31	6							2	1		9	1		37
Proctotrupidae	1		31		11			19	5	25	43	33		1			12	21		19			33					1		2	12	34	3	26		4	1	3	2	1		3			9	6		3
Procyonidae			1		1		1	1		1	1	1								1											1								1						1			1
Prodidomidae											1					6	3											2
Prodoxidae		1	13		6	2	2	9		9	11	6		7			3	10	1	12	1		7	2				1			6	3		9		1		7	1	7					6	8		11
Progynotaeniidae						2								1						1			3								2	1	1							1
Promesostomidae											10	1	2				2	7		4													4												2
Pronocephalidae																				1			4											1
Propappidae			1	1		1	1	1		1	1			1			1			1			1					1		1	1			1				1		1		1			1			1
Prorhynchidae			6		1	3		3		2	4		2	3		1	2	3		3			4								1	3	2	3					1				1		1			3	1
Prosopistomatidae										1							1											1			1												1		1
Prosthogonimidae			1		1	3		1		2	6						2			2			3								4			3								2			4			3
Prostomidae			1	1			1	1		1	1	1					1			1					1					1	1			1	1													1
Proteidae				1																										1				1
Protentomidae			6	1				1		4	3				1		2		2	2			2					3						5					3									4
Proteocephalidae		1	5		1	7	2	7		8	11	4		7	1		3	10		8			8					2			8	5	1	10				10		10					7	8		11
Protodinychidae
Protoglomeridae																	1			1							1							1		2
Protohydridae					1	1					1	1						1		1			1																						1	1
Protomonotresidae			1								1						1	1
Protoplophoridae																	5											1						5
Protoribatidae			13			3		2		4	5	2					14	5		3			3								7			6											2	1		14
Protostrongylidae		8	1			5			1		3			2	1		9	1		9			7		3						3		1	12	3											3		11
Protroctopsocidae									1																	1								1
Provorticidae			2		1	1				1	14	1	3				4	7		7													2	2											2	3		2
Prunellidae	2	2	3	2	2	2	1	2	1	3	3	3	1	1	2		2	4	2	2	1	2	2	1	2	2	1	2	2	2	2	1	1	3	2	2		1	2	1		1	2	1	2	2		3
Psephenidae			1		1			1		1	1	1					1	1	1	1			1					1		1	1			1		1				1					1			1
Pseudaliidae											1						1
Pseudocaeciliidae						1			1																1			1						1	1
Pseudocheylidae
Pseudococcidae			8		3	19	3	25	5	29	52	14		1		17	30	2	25	123	11		50		19			12	12	12	63	3	3	99	19	54	1		1	12		17	1	3	54	2		59	6
Pseudodiaptomidae															1				1	1					1										1	1
Pseudodiplogastridae											2																											1
Pseudonymidae			1								3									4
Pseudopomyzidae			1					1		1	1							1					1								1															1		1
Psilenchidae			1		3			1		3	1						1			1											2			1		1		1							3			3
Psilidae	10		1		16			29		35	29	30				1	21	1					26		1						23	20		18	1	5		16								9
Psilostomidae						4				5	11						3	3		2			6								5		1	5				3							1	1		11
Psittacidae			1		2					1	1				1	2	1			1			2											2		2									1
Psocidae		2	14		12	6		19	4		20	7		1		5	20	18		20			13		1	2		13		9	15	9		18	1	2			12	12					13	11		17	4
Psoquillidae					1						1												3																										1
Psorergatidae
Psoroptidae
Psoroptoididae								4		2	2												3		2						1			3	2										2			4
Psychidae	2	26	67	3	21	36		64	4	38	45	18		20		5	66	21	9	71	7	1	17	1	7			37	9	19	40	4		91	7	13	4	18	12	17	2		20	6	25	17		30	1
Psychodidae	2	1	71	1	80	37	2	34	12	64	118	51			10	14	68	19	14	165			94		28	3	1	46	12	4	59	62		102	28	4			1		3	5	3	4	40	25		22
Psychomyiidae	3	7	13	8	8	13	1	15	2	10	14	7	2	3	3	2	18	4	7	17	3		11	2	8	8	2	19	4	8	7	9		19	8	6	1	4	6	5			5	1	7	3		7
Psyllidae			71	1	49	38		86	9	77	76	44			17	36	76	56	4	113	19		60		39	4		38	7	13	7	29		114	39	49			2			58		8	19	49		66	3
Psyllipsocidae			2		4			4			3					3	3	2		3			2					1		2	2	1		4					3						1	1		2	1
Pterochthoniidae			1																												1
Pteroclididae			1		1	1	1	1	2	1	2	1	1	1			3	1		2	1	2	1					2		1	2	1		3				1		1				2	1	1		1
Pterolichidae					2	2	3	5		5	13	2					3	5		20			16		1			1			1	1	1	22	1					1					8	2		9
Pterolonchidae			1			3				1					1		5		1	2		1			2			2	1		2			3	2	2								3
Pteromalidae		1	113	20	86	32	9	102	13	439	694	40		1	25	44	325	50	6	237	4		616	42	12			28		177	339	102	6	161	12	13		22	3	7		151	27	2	28	53		77	1
Pteronyssidae						1		9		7	5												8		1						2			11	1			1				4			3			6
Pterophoridae	5	32	63	34	42	68	16	59	28	56	63	41	3	37	12	26	92	42	45	98	20	13	38		43	10	18	60	21	44	60	20	3	90	43	46	7	30	27	34		2	47	22	38	35		53	5
Pteropodidae									1
Pterygorhabditidae																															1
Pterygosomatidae
Pthiridae								1			1							1							1									1	1													1
Ptiliidae		2	76	10	28	12	25	66	13	45	80	67	2	23		16	44	57	2	76		12	75	39	21			24	2	23	48	41	1	72	21	28	15	20	4	33			2	6	46	60		57	10
Ptilocolepidae			1		1		1			1	1	1					2			1											1			1					1	1					1			1
Ptiloxenidae								1		1	4							1		6			4		1									4	1										2
Ptychopteridae			6	3	7			6		9	8	7					2	6	1	3			7					1			8	6		4		1		6	1						7	7		9
Pulicidae			4		5	2		4	3	5	6	5	5		4	9	10	1	4	9	2		9		6			6	1	1	4	7		9	6	6								3	5	2		6	6
Punctidae	2	1	1	1	1	1	1	1		1	2	1	1	1	2	2	2	1	2	2	1		2	1	2		1	2	2	2	1	1	1	2	2	2	1	1	1	1		1	1		2	1		1	2
Pupillidae	2	3	5	2	2	3		5		5	6	2		1			2	1		5	1		2	1				2		2	3	1	1	5		2	2	1	2	1		1	3		1	2		5
Pycnonotidae																	1
Pyemotidae			3		1					1	10	1								4			2								1			1						1					1			5
Pygidicranidae																3
Pygmephoridae
Pyralidae		88	119	83	79	130	7	113	36	107	105	74	3	62	31	63	244	74	89	207	48	36	75		99			163	54	141	134	24	4	169	99	120	12	65	51	68		13	127	80	78	62		93	13
Pyramidulidae	2	2	1	3	1	1		1	2	1	1				1		4		1	2			1	1	2	1		4	1	3	1	1		3	2	2	1		1			1	3					1
Pyrgodesmidae			1					1			2	1				1	2			1		1	1								1														1	1
Pyrgomorphidae									3						1	1	1			1					1	1	1	1	1					1	1	2								1
Pyrgotidae			1					1																							1			1														1
Pyrgulidae		4																										6		1				1									14
Pyrochroidae			1														3			2												1		4		1
Pyroglyphidae
Pyrrhocoridae	1	3	2	3	1	3	1	2	2	2	2	1		1		1	2			3			1					3	1	3	2			3		1	1	1	2	1		2	3	1	1			2
Pythidae			2	1			2	1		1	2	1		2			1	3		1			1					1			2			1				2		2					1	2		3
Quadrigyridae
Quadroppiidae			1		1					1	2						10	2		3			7					2			3			2											1	1		3
Qudsianematidae			17		5	3		15		42	33	3		8	1		52	1		4			2		4						49	1		40	4	14		10				3			27	6	7	49	1
Quimperiidae										1	1	1					1	1		1			1									1						1								2		1
Rachiceridae																	1			1
Raillietiidae
Rallidae	7	7	8	7	7	7	7	8	9	8	9	8	6	6	9	10	11	8	7	11	5	9	10	5	8	7	7	9	7	7	8	9	6	10	8	8		6	5	6		7	7	9	8	7		8	8
Ramazzottidae
Ranidae	1	7	6	4	6	6	5	6	1	6	5	6		5	2		6	3	2	12	1		4				1	6	1	7	6	1		10		2	2	4	5	5		5	4		6	2		6
Raphidiidae	1	4	10	2	4	12	1	11	2	8	9	3		3			14	3	1	14			4		2		4	33	3	6	10			18	2	1	3	2	3	3		4	8		5	3		7
Raphignathidae
Rathkeidae											1							1					1											1											1	1
Raymondionymidae	7			1				2							7		8		3	11		6			5			2		3				19	5	4								1
Rectijanuidae
Recurvirostridae		2	2	2	2	2	2	2	2	2	2	2	1	1	2	2	2	1	2	2	2	2	2		2	2	2	2	2	2	2	2	1	2	2	2		1	1	1		2	2	2	2	2		2	2
Reduviidae	7	22	16	16	10	27	10	14	23	13	14	7		8		21	58	7	3	44	1		7		1	1		36	1	27	21	2		46	1	7	3	7	6	7		12	20	11	9	8		10	7
Regulidae	2	2	2	2	2	2	1	2	2	2	2	2	1	2	2	1	2	2	2	2	2	2	2	2	2	2	2	2	2	2	2	2	3	2	2	2		2	2	2		2	2	2	2	2		2
Reighardiidae											1	1	1							1			1											1						1					1	1
Remizidae	1	1	1	1	1	1	1	1	1	1	1	1		1	1		1	1		1		1	1			1	1	1	1	1	1			1		1		1	1	1		1	1	1	1	1		1
Renicolidae						2	1			2	5								1	4			7								1		2									1						2
Rhabdiasidae		1				2	4	1			2						4			3			3					1			3			2				1										6
Rhabditidae			22		10	2		5		20	95	3		7	6	2	22		1	10			6		3						46			23	3	2		8				2			33			27
Rhabditonematidae			1								1
Rhabdochonidae		1	2			4		1		4	1						4	2		2			2					1			2			1				2		1						2		4
Rhabdolaimidae			2							4	3			1			2														2			2											2			2
Rhadinorhynchidae						1																									1			1
Rhagidiidae			19		3			8		41	19	4	1				1			5			14							1	2	3	1	8						2					2	3	2	16
Rhagionidae	4	13	38	16	22	18	14	31		25	35	18					15	16	6	31			20		3	1		15	2	22	26	6		36	3	6		10	7				2		19	14		14
Rhaphidophoridae		2	2	3	1	2		2		3	2	1		1			2		2	4			1		2	1	3	15	2	4	1	1		13	2	1			1	1			5	1	1			1
Rhinolophidae		4	2	5	2	5		2	4	2	2				2		4		3	4			2	1	4	2	4	5	3	4	3	1		3	4	3	1		1			2	5	2				2
Rhinonyssidae
Rhinophoridae	2	2	7		7	1		15		9	10	5			3	4	10	2	5	13			7		1		1	3		10	11	4		21	1	4	1							2	7	7		12	1
Rhinotermitidae		1	1			1					1					1	3			3			1		1			1		1				2	1	1						1							2
Rhipiceridae																												1
Rhodacaridae
Rhopalidae	7	13	17	12	12	21	13	12	12	16	15	9		9		9	24	12		22			11					19		18	15	2		20			10	10	11	9		13	19	10	10	10		9	3
Rhopaloiulidae																																		2
Rhopalonematidae											1	1		1				1		1			1									1	1				1	1							1	1
Rhyacophilidae	9	6	24	16	10	19	2	26	1	16	24	2	1	2	1		25	3	5	31	3		4	2	2	1		19	1	11	10	2		33	2	2	5	4	6	4			12		2	2		13
Rhynchitidae			25	18	12	25	2	20	1	26	24	7			1	3	23	4	5	31			15	5	7		1	18	2	27	23	1		33	7	17		3				1	12		6	6		21
Ricaniidae																											1	1	1
Ricinidae											5						4	3							1						3			1	1													4
Rictulariidae			1			5	1				1				1		5		1	1											1			2		1												2
Riodinidae		1	1	1	1	1		1		1	1	1		1			1			1			1					1		1	1			1		1	1	1	1	1			1					1
Ripiphoridae	1	1	4	3	2	2	1	2	1	2	4	2	1	1	4	1	10	5	4	9	1	1	2	1	7	1	1	5	3	2	3	2	1	10	7	5	1	1	1	3	1	1	1	3	3	2	1	4	1
Robertdollfusidae																		1
Roeslerstammiidae			2		1			2		2	2	1		1				1		2			2		1						2			1	1			2	1	1						1		2
Rosensteiniidae
Rotylenchulidae			1						2		1						2											1			1			2										1	2			1
Rutelidae	3	25	22	20	6	30	10	16	5	14	13	4		5	2		22	2	3	17	4		3		5	4	4	32	5	24	19	1		25	5	10	5	7	2	6		7	19		6	2		15	1
Rutripalpidae
Sabaconidae
Salamandridae	2	5	7	6	5	5	2	7	1	7	5	3		2			9	2	2	8	1		3	1	1		1	5		6	5	1		8	1		1	2	5	2		3	4		5	2		5	1
Saldidae	3	16	23	15	15	19	12	19	6	17	26	17	1	20		5	18	21		24			22		3			19		14	16	15	1	23	3	1	8	4	8	13		9	12	1	20	25		23
Salentinellidae															2		6		1	4					1			1						2	1
Salmonidae		5	12	2	9	8	1	25	3	7	22	9	1	7	6		6	15	15	15	1		29	2	17	8	8	8	8	5	6	7	7	17	17	17	1	8	1	8		1	7		7	9		14
Salpingidae			1				7			5	11	11		7			4	9	4	17			10		5					2	7	2		16	5	6		6		9					8	9
Salticidae	21	3	73	5	50	90	31	76	4	69	84	32		34	17	34	111	42	71	131	9		39	7	50	40	55	118	54	80	76	15		128	50	79	39	37	6	33		21	82	18	42	29		61	10
Sanguinicolidae			3			1				3	2						3						3								3							3		1								4
Sapracaridae
Saproglyphidae
Sapygidae			5		4	3		4	1	4	4	3			1		2	2		7			2					5	1	5	5			5		1	1							1	4	3		1
Sarcophagidae	23	54	119	3	64	108	44	117	31	129	129	61		47	2	29	124	58	48	173			57		27	3	1	67	1	77	140	21		155	27	61	4	23	6	25	1	56	13	30	74	53		116
Sarcoptidae
Saturniidae	3	2	7	5	3	5	2	5	1	5	2	2		2	1		4	2	1	5	1	1	1	1	1			5		7	4	1		5	1	2	1	2	3	2			6		3	2		3
Saxicolidae	11	13	14	13	12	17	9	14	22	11	16	17	8	14	14	17	17	17	11	19	10	13	23	8	11	14	15	22	15	13	13	15	9	18	11	14		8	9	9		12	13	17	17	19		14	4
Scarabaeidae	9	39	27	39	17	44	13	20	12	25	23	12		7	17		52	3	25	42			7		24	10	11	46	12	39	33	5		46	24	31	6	7	9	8	3	26	41	4	14	7		23	4
Scaridiidae		2	1		1							1								2
Scathophagidae	7	1	21	1	40	2		45	1	68	61	40		42	1	1	20	83	3	42			53	20	1			1		1	33	31	1	15	1	1		21							41	74	1	70	2
Scatopsidae	9		34	1	21	2		63		45	52	18	1		2	5	20	28	5	53	1		46	4	4		2	8	2	3	27	15	1	17	4	2	3	11		2				4	31	31	1	29	1
Scelionidae			47	1		34		9		7	41	80	3	1	1		8	29	2	30			68		3			2		2	55	18	2	42	3	9				1		71			1	3
Scenopinidae	3		5		2			3	1	3	3	1				4	7	2		1			2		1			2			5	2		4	1	3		1								1		5	1
Scheloribatidae			7			5				5	9	2				1	22	3		2			4					1			6			11											4	4		3
Schendylidae			5	2	1	5	1	1	1	2	1	2			1	3	6	1	2	10	3		4	1	4		2	9	2	4	2	4		13	4	6			1		5	4	1	1	2	1		3	1
Schistonoeidae
Schistosomatidae			2			4	3	1		7	8	2		2		1	2	2	1	4			2		1						2		2	5	1			3		3		2			1			6
Schizopetalidae		5		5		8																				2	6	16	3	8				4		2							2	1
Schreckensteiniidae			1		1			1		1	1	1		1			1	1	1	1	1		1								1	1		1				1	1	1					1	1		1
Sciaridae	3	31	245	6	15	81	1	146		244	413	51	1	6	12	39	153	266	16	85	1		262	12		1	2	106	6	6	51	97	4	151		2		16	18	37					110	77	9	53	8
Scincidae		1				1			5							3	2			1		2			2	2	3	3	1		1			3	2	2							1	1
Sciomyzidae	8	12	79	31	64	27	5	75	10	79	83	66	3	66	5	2	49	71	13	88	5		70	25	20	1	5	36	6	29	71	54	5	76	20	27	1	64	8	53			14	2	55	55		73
Scirtidae		10	15	5	4	10	1	22	3	10	22	11		3		1	35	11	8	19			10		7	1	2	18	10	5	6	10		33	7	6		3		16			2		11	11		19
Sciuridae		1	3	1	2	2	3	3		2	3	2		2		1	2	2		4	1		2	2				2		1	2	2		5			2	1	1	2		3	2		2	1		3
Sclerogibbidae															2		1		1	2					4		1	1						2	4	1
Scleropactidae																	1			1								2
Sclerosomatidae
Scoliidae	3	8	6	7	2	7	1	2	11	3	2				8	1	10		7	9	1	1			5	7	12	12	10	7	7			9	5	8					2	5	7	5		1		1
Scolopacidae	7	26	38	22	39	30	27	32	26	33	43	41	24	29	30	37	43	42	22	46	31	25	52	27	21	21	23	33	25	26	33	45	38	37	21	24		28	22	30		22	26	29	44	43		35	40
Scolopendrellidae	2	1	7	8	2			7		6	8	2					11	2	6	9			6					4	1	5	3	2		7		3										3		1
Scolopendridae		2		2		1			1						1	2	2		1	2					1	2	2	2	1	2	1			3	1	2						1	1	2
Scraptiidae		12	22	15	7	17		21	5	16	25	3			2	4	18	4	6	30			9		3		4	23	4	22	13			47	3	5			1				11		17	1		19
Scutacaridae
Scutariellidae				5																										7
Scutelleridae	1	11	10	10	6	19	5	10	11	9	10	7		4		3	21	4	2	17			5					21		15	14	2		19		1	3	5	5	5		10	16	7	6	3		9
Scutigerellidae	2	2	7	5	3			7		2	5	2		1			9	1	3	9	1		8	1	1			3	2	7	2	1		12	1	2			1		2				1	2		2
Scutigeridae		1	1			1		1	1	1	1	1			1	1	4	1	1	1	1	1	1		1	1	1	1	1	1	1			1	1	1					1		1	1					1
Scutoverticidae			5			3	1	2			2	1				2	10	2		3			7								3			7											3	1		2
Scydmaenidae	2	16	81	61	26	23		42	6	50	49	30		22	4	11	95	25	31	108		1	29		24	1	5	52	8	78	37	1	1	158	24	11		21	27	20			16	2	30	25		52	2
Scyphacidae						1			1										2	2					2			2		1				3	2									2					2
Scythrididae	4	23	42	22	13	33	21	31	1	31	41	12		13	1	10	98	11	14	79	2	1	12		14	1	1	47	3	18	31	3		57	14	15		8	2	13	1	21	22		13	9		23
Scytodidae			1	1	1	1		1		1	1	1			2	4	3		2	2	1		1		2	1	2	3	2	1	1	1		2	2	1	1		1			1	1	3	2			1	1
Segestriidae	2		2		3	3	1	3		2	3	2			5	5	6	1	4	5	3		3	1	3	1	2	4	5	4	3	1		6	3	3	2	1	1	1		1	2	2	3	1		2	1
Seinuridae			1		2					1	5			2									1								6			3				2							4			8
Seiodidae
Sejidae
Selenopidae					1												1											1
Selenoribatidae																				2								1		2
Sepsidae	6	3	23	1	22	13		24	5	28	31	24	3	6	7	6	18	32	12	24	2	1	29	15	8			12	3	4	27	19	6	25	8	10	3	13	1	5			7	3	23	26		23	6
Sericostomatidae	2	5	4	4	4	2	2	5		4	4	2		1			8	2	1	6	1		2	1	1	1		10	1	3	4	1		7	1	1		2	3	2			4		3	2		4
Serpulidae				1																										1				1
Sesiidae	3	40	46	44	20	55	15	34	11	43	35	15		12	8	2	51	15	16	53	8	4	16	3	18		2	58	19	51	46	6		55	18	28	15	17	26	13		7	49	4	13	13		31
Seuratidae						2									2	1	4			1											1			1														1
Sialidae			3		3	3		3		3	5	3					4	5		2			2							4	3	1		4			2	1	2						3	5		3
Sicariidae															1	1	1	1	1	1					1	1	1	1	1	1				1	1	1								1	1				1
Sididae	2	2	4	2	2	5	2	3		6	5	4		4			3	4	2	3			3	3	1			3		2	5	3	1	4	1		2	4	2	4		3	3		3	4	1	3	1
Signiphoridae						1				3	2					1	6			2			2							2	4			5		1						3				1		1
Silphidae	1	11	25	18	20	22	22	23	2	24	23	20		20	7	3	24	18	1	27			21		10			16	1	18	22	12	1	26	10	14	12	19	19	19		21	13	1	22	17		22
Siluridae			1			1	1	1		1	1			1	1		1		1	1			1		1	2	2	2	2	1	1			1	1	1		1		1		1			1			1
Silvanidae			10		10	10	10	10		11	10	10			1	3	20	2	12	15			10		12			17	1	10	10			15	12	5		10										12	1
Simuliidae	20	1	46	32	24	43	31	33	8	44	50	23	1	6	4	5	43	39	15	47	4		33	5	17	7	9	15	7	3	20	26	4	61	17	19	4	16	15	23			13	2	19	54	1	52	1
Siphlonuridae			5	3		3		2		4	5	3					7	5	1	2			3	2	1			1		2	3	3		1	1			3	2	1			2		4	5		4
Siphonocryptidae																1
Siphonotidae																							1
Siricidae		2	11	2	6	5	2	7		9	10	5		6	1		3	6	1	8			8		2			2		7	7	5		8	2	1		3	4	5					7	2		8	1
Sironidae
Sisyridae			3		2	4		2		3	5	3		1			3	3	2	3			3		2			1		3	4	3		2	2		1	1		1					4	2		2
Siteroptidae			3			4				3	13						2	1		1							1				15			2					1									9
Sittidae	1	2	1	2	1	2	1	1		1	1	1		1			1	1	1	1	1		2					2		2	1		1	1		1		1	1	1		1	2		1	1		1
Skrjabillanidae		1								4	1												1								8			1				2		1								3
Skrjabingylidae						1	1										1	1					1									1		1														1
Smarididae			1					1	1										1	4			1								2			6		2										1		2
Sminthuridae		3	6		2	5	3	4		1	7	1		1	1	1	15	4	3	14			3		1		2	4	4	1	9	1		12	1	4		2		1				1	2	1	1	9	2
Sminthurididae			7		2	1		8		3	12	2	2		2	2	4	10		10			7								2	3	5	2		3		1		5					2	6	3	9	2
Soboliphymatidae																	2			1			1																									1
Somabrachyidae																	1																			1
Soricidae		6	9	8	7	7	7	9	2	7	9	3		4	2	3	9	6	2	10	3		4	1	2	1	2	7	3	8	7	1		9	2	3	7	3	6	3		6	7	2	6	6		8
Sparassidae	2		1	1	3	3	1	2	1	2	2	1		1	3	3	7	1	3	3			3		2	2	5	5	3	3	1	4		4	2	3	1	1	1	1		1	2	1	3	1		1
Sparganophilidae								1												1			1
Spelaeoniscidae															1		1																			5								1
Sperchontidae
Sphaeriidae			20	2	18	14	4	19		18	22	18	9	18	2	1	13	19	5	21			22	14				6	1	5	17	14	12	17		6	10	16	14	17			8	2	19	21		21	1
Sphaeritidae			1		1	1	1	1		1	1	1		1				1		1			1					1			1			1				1		1					1	1		1
Sphaeriusidae			1		1		1	1		1	1	1					1	1		3			1		1					1				1	1		1	1							1			1
Sphaeroceridae	54	3	102	7	100	78		109	47	153	132	80	17	38	33	58	123	108	22	89			133	47	29	3	1	37	18	23	145	60	30	117	29	35		19		68	1	1	19	43	72	98	3	96	29
Sphaerochthoniidae			1			1											2			1								1			1			1
Sphaerolaimidae			1		1			1			2	1																						1											1
Sphaerolichidae																				1														1
Sphaeromatidae								1												2										8				6
Sphaeronematidae					1						2																																		1			1
Sphaeropsocidae					1			1			1							1		1			1									1							1							1
Sphaerulariidae											1	1								1			1
Sphecidae	2	14	17		7	24	1	17	16	9	10	6		5	6	9	39	5	11	35	6		4		17	3	15	31	15	17	19	3		34	17	21		1	7	4				9	6	3		9
Sphincterochilidae															2		3			1					1			1						1	1	1								1
Sphindidae			3	3	1		2	2		2	2	2		2			2	2	3	3			2		2			1		3	2	1		3	2	2		2							2	2		2
Sphingidae	16	20	21	17	18	27	19	21	10	20	21	18	5	17	9	6	22	17	20	23	16	8	20	10	16	1	3	26	9	22	20	12	5	23	16	19	14	17	18	18		15	19	7	18	15		19	4
Spinozetidae																												1
Spinturnicidae
Spirobolellidae											1	1											1																						1
Spirocercidae		2				5	5				1			1	3		6	1	1	3			2		3			1			2			5	3	1		2							1			4	1
Spirorchiidae							1
Spiruridae						1					1				1		4						2								1			2		1						1						2
Spongillidae			4	4	4	6	1	5		6	8	4	2	3	1		2	4	3	5			5	5	4			3	1	6	6	5	1	5	4	1		1		3			2		6	5		9
Spongiphoridae		1	1	1	1	1				1	1	1		1		2	1	1		1	1		2	1			1	2		1	1	1		1		1				1				1	2	1		1	1
Staphylinidae	13	320	1134	724	657	570	179	958	211	868	1003	609	34	410	51	259	1028	609	309	1621	2	8	723	25	251	21	34	766	85	769	764	124	52	1724	251	248	75	372	179	417	1	31	307	56	591	553	3	801	76
Stathmopodidae			2		1		1	1	2	1	1	1		1		1	3	1		2			1		1			2	1		1			1	1	2	1	1		1				1	1	1		1	3
Steganacaridae			11			4	1	1		7	6	8					26	5		9			6					14		2	9			17											4	2		16	4
Steinernematidae			2		3	1		6		7	7	3		1			5	1		3			5					1			1	2		4											3			2	2
Stenasellidae						3											7		1	2					2					2	1			2	2								1
Stenocephalidae		4	3	3	2	4	2	3	3	3	3					3	5			5			2					4		3	4	1		5			1	1	2			3	4	4	2			3	2
Stenoniscidae															1	1			2	1					2			1		1				2	2	2								1
Stenopsocidae			4		4	2		4	1		4	3				1	4	4		4			4					1		4	4	2		4					3	3					4	3		4
Stenostomidae			5			1		5		7	19	3		3			6	12		10			4								2	4		18						1					2			17
Stenotrachelidae																		2																				1		1						1
Stephanidae			1		1	1		1		1	1						2		1	2					2					1	2			1	2	2							1		1
Stercorariidae		3	4		4	3	3	4	2	3	4	4	5	4	3	4	4	4	2	4	4	4	4	4	3	3	2	4	3	3	4	4	4	4	3	4		4	3	4				3	4	4		4	4
Stigmaeidae
Stigmocheylidae
Stomylotrematidae											1
Stratiomyidae	10	18	66	27	46	50	12	63	10	66	67	36		21	5	6	62	29	12	79		2	47	19	20	3	4	42	8	50	57	31		84	20	36	1	28		14		19	13	4	46	29		60
Streblidae		1															1			1					1			1						1	1
Streptaxidae																2
Streptocephalidae			1			1				1	1						1														1																	1
Strigeidae		1	4			16	4	11	3	13	19	1		7		3	2	9	1	9			17								13	2	2	13				15		10		7			11	3		23
Strigidae	6	8	10	8	10	9	12	9	4	11	11	10	4	11	5	8	8	11	3	10	3	6	8	3	4	4	4	7	4	10	11	5	4	9	4	5		12	9	12		7	6	4	9	12		12	2
Strobilopsidae		2				2																									1
Strongylacanthidae																	2														1			1
Strongylidae											27	2					31			8			40								1	1	22	30		4									15			33	4
Strongyloididae		1	1			4	1	1			3	1		4	3		11	1		3			7								3		2	6		1		4										10
Strongylophthalmyiidae	1									1	1	1		1				2					1								1									1								1
Sturnidae	1	2	2	2	2	2	2	2	2	2	2	2	2	2	3	4	3	2	2	4	2	2	2	1	2	2	2	3	2	2	2	2	2	2	2	3		2	1	2		2	2	3	2	3		2	1
Stygiomysidae																																		1
Stygothrombiidae
Styloniscidae					1	1					1	1					1			1			1		1			8	1			1			1										1				1
Stylopidae		1	5	1	2	2		3	1	4	6	2		1		3	5	3		5			5					3	1	2	7			5		1							1		1	2		2
Subulinidae	1	1							1						2	1	2		1	2		1			1	1	2	2	1	1				1	1	1								1					1
Subuluridae						2					1						11														1			1														1
Succineidae	1	2	4	2	5	3	4	4		3	5	4		4	1		5	3	1	5	2		5	3	1			2		3	4	4	1	5	1	1	3	4	3	3		4	2		5	5		5
Suctobelbidae			27		4	4		6		21	24	3					31	12		3			12								25			10											8	1		33
Suidae		1	1	1	1	1	1	1		1	1	1		1			1	1	1	1					1			1		1	1			1	1	1	1	1	1	1		1	1		1			1
Suidasiidae
Sulidae		1	1		1	1		1		1	1	1	1	1	1	1	4	1	1	1	1	1	1	1	1			1		1		1	1	1	1	1		1	1	1				1	1	1		1	2
Syarinidae			1					2		1	1				1	4	1			1					1	1								5	1	1								1		1			3
Sychnotylenchidae																																		1
Sylviidae	18	26	28	26	37	28	20	31	32	27	43	37	18	26	29	24	36	37	25	43	23	28	46	13	26	25	26	34	27	26	25	33	17	40	26	28		24	20	25		23	26	38	40	34		33	3
Synaphridae			1												1	3	1			1										1				1
Synchaetidae
Syngamidae		1			1	5	2				2			2			3	3		1			3											3				2		5		2			2			8
Syngnathidae		1		1		1			1						1		1		1	1		1			1	1	1	1	1	1				1	1	1					1			1
Synxenidae																	1																			1
Syringobiidae			1			1					9									16			9											14											5			19
Syringophilidae
Syrphidae	39	22	355	173	315	242	100	440	41	366	455	275	27	221	57	34	345	308	131	492			267	144	68	1	39	209	68	222	364	177	29	471	68	138	196	216	194	273		34	174	38	310	320		313	22
Syrphonematidae																				1
Tabanidae		43	64	47	41	62	5	52	10	54	58	36		16	3	2	99	34	10	89	1		29		18	3	3	75	3	84	56	11		86	18	26	13	37	17	8		18	41	3	32	34		49
Tachidiidae					1						3							2	1	6			4									2		2						1					1	2	2	1
Tachinidae	128	65	508	91	283	410	65	549	40	465	500	254		96	43	51	510	279	82	601	30		255	18	88	18	26	300	48	238	443	63		591	88	175	15	49		70		141	89	36	327	200		470	4
Taeniidae		8	9		3	14	12	10	2	10	13	6		6	3	1	15	4	2	13			10		2			6	1		12	3	4	12	2	2		11		5		5		2	7	3		15	3
Taeniopterygidae		2	15	11	8	16		9		14	16	3		1			13	3	1	12			4		1	1	1	5	1	3	11	2		11	1	3		3	7	4			15		4	2		15
Talitridae
Talpidae		2	1	2	1	2	1	2		1	1	1		1			3	1		3	1		1					3		2	1			3			1	1	1	1		1	3		1			1
Tanaupodidae			4		2			3			3						3			3			2								3	1		6		1										3		4
Tanypezidae	1		1	1				1		1	1	1						1		1			1		1						1			1	1	1									1	1		1
Tarsocheylidae											1																							2														1
Tarsonemidae			11		7		5	7		6	45	9	1			1		4		12			13	3	3			8	1		37	14		25	3	16				1			1		9	2		104
Tectocepheidae			6		3	2		1		2	5	1					8	3		3			3					3			5			4											1	1		2
Tegeocranellidae
Tegoribatidae			2			1		1									2	2		1											3			2														2
Telemidae																	1			1
Telorchiidae			1			3	1				3						1			3			4								3			4														1
Telotylenchidae			12		20	6	1	4	9	9	36	1		2	1	6	36			5								1			20			25		1		3		1		2		3	28	4	1	35	1
Temnocephalidae											1
Temoridae			2		2			2			6	3		5			1	6		3			3								2		1	1				1		5			2		3	5	1	6	1
Tendosphaeridae																				1								2						3
Tenebrionidae		74	89	46	33	101		2	62	54	85	51		45	6	137	14	50	82	113		2	35	4	124	66	59	194	81	92	75	10		224	124	170		39	20	35			23	57	1	47		83	18
Teneriffiidae			1					1								1				1
Tenthredinidae	29	86	496	54	357	250	73	467	17	440	550	263		332	14	4	205	577	42	507			408		37			47	15	294	334	217	3	434	37	63	10	18	195	278		43	149		339	160	2	325	6
Tenuialidae			1								2	1					2	1													1			2											1	1		1
Tenuipalpidae			1		1	2		1	3		5	1			2		5			9			6		1			58						14	1						1				5			2
Tenuisentidae											1									1
Tephritidae	38	51	123	2	72	91	2	120	43	102	114	56		8	24	31	107	61	41	147	20		76	14	33	7	17	69	48	18	113	25		139	33	56	2	56		5		41	12	23	74	58		97	7
Teratocephalidae			2		1					7	2						3								1						3			1	1	2		1							3		1	6
Termitidae																1
Terpnacaridae											1	1								2																									2
Tesseratomidae
Testacellidae					1			1			1				2	2	3		3	4	2	1	3	2	1					2		3		2	1	1								1					1
Testudinellidae
Testudinidae		2	1	2		2	1	1			1	1			3		3		1	1					4			4		2	1			2	4	3		1		1		1	2					1
Tethinidae			2		5	7		1	7	3	9	7			5	10	14	3	1	12			9		7		2	4	8	1	5	2		9	7	7								9	5	1		5	4
Tetrabothriidae						4				3	3					1	1	1		1			6								1		6	5													1	1
Tetracampidae			4	1			1	1		8	8	1				1	3			3			7	1						4	8	1		3						1		5	3		2			1
Tetragnathidae	4		17	2	15	17	10	16		15	17	14		14	9	6	21	14	11	17	5		14	10	7		3	12	1	13	16	13	2	18	7	5	11	13		13		8	14	2	15	13		15	4
Tetrameridae		1				4					1			3			2			1			1										2	2				1		1		5						3
Tetranychidae		1	7		13	11		21	3	5	23	7				6	22	7	1	39			25					47			37	6	2	45				2		1					35	7		29
Tetraonchidae			1			1	1			2	1						1	2		2			2								1			2				1		2						2		2
Tetrasiphonidae
Tetrastemmatidae			2	1		1		2		1	2	1								2			2																						2			1
Tetratomidae			7	4	4	1	4	6	1	6	7	5		5			7	5	3	8			4	3	2			2		4	7	3		7	2	3	1	4	1	5		3	2		5	4		6
Tetrigidae		6	7	5	5	8	4	7	3	7	6	4		3	1	1	9	5	2	9	3		3	1	5	2	2	8	2	6	6	2		6	5	3	3	4	4	4		6	8	1	5	3		7	1
Tettigometridae		3	13		6	5		6	1	9	10			1	1	2	20		4	18			1		7			10		1	11			24	7	13				1		5			1	1		5
Tettigoniidae	2	26	22	38	9	45	7	22	8	16	14	7		7	9	11	45	7	15	41	3		5		23	6	14	68	20	40	21	2		58	23	25	8	9	9	7		14	38	8	9	5		12	3
Teutoniidae
Thamnocephalidae																	1			1					1				1						1
Thanerocleridae											1																							1														1
Thapariellidae																																																1
Thaumaleidae	4	2	18		3	3		8		9	15	5			1	1	9		4	24			3		3	2	1		1		4	2	1	11	3	2							2		1	4		8
Thaumastellidae
Thelastomatidae			2					1		1	15	1					2			8								1						2														1
Thelaziidae		1									2						1						3											6		1						1						5	1
Theraphosidae					1				2								3																			2
Therevidae		3	30		8	5		21	2	26	29	13				12	17	17	4	25			13		1	1	2	22	2	1	25	1		24	1	4			1					2	11	14		16
Theridiidae	18		69	4	65	74	32	67	10	67	79	42		38	22	42	91	44	58	112	12	1	58	19	36	13	32	59	25	53	58	37	5	96	36	32	36	35		34		22	43	14	51	37		65	16
Theridiosomatidae			1		1	1		1		1	1	1					1		1	1			1					1		1	1	1		1											1			1
Thiaridae			1								1					1	1			1											1			1										1	1			1
Thinozerconidae
Thomisidae	10	3	45	5	37	61	27	44	2	42	50	18		24	5	14	68	28	34	66	6		28	5	24	13	23	45	14	45	49	14	1	68	24	14	25	22	1	23		31	43	6	34	20		40	3
Thoracostomopsidae
Thraupidae																							2									1	1
Threskiornithidae		2	2	2	3	2	2	3	2	2	2	2	2	2	3	3	4	2		3	1	2	2		2	1	2	2	2	2	2	2	2	3	2	2		2		2		2	2	1	3	2		2	3
Thripidae	5	35	126	16	12	90	3	77	34	149	140	68	1	22	7	47	146	79	18	132			117		21	1		49	12	60	124	19	9	129	21	44	1	33	2	43		41	29	2	92	64		127	21
Throscidae			3	4	3	3	4	8	7	6	10	5		1		5	9	7	7	14			7		2			8		3	8	2		12	2	6	4	1		3		1			5	3		7	1
Thyreocoridae			2	1	1	3	1	1		2	1	1		1			2	1		2			1					1		1	2	1		2			1	1	1	1		1	4		1	1		1
Thyrididae	1		1	1	1	1		1		1	1			1			1		1	1								1		1	1			1		1			1	1		1			1			1
Thyrisomidae			1					2									3																	1														1
Thysanocercidae																							1											1
Tibicinidae		5	3		1	6		2	2	4	4	1					20	1	3	15			1		5			10	4	7	3			11	5	9						2	2			1		2
Tichodromadidae	1	1	1	1	1	1		1		1	1				1		1		1	1	1	1	1					1		1				1					1				1	1	1			1
Tineidae	7	28	70	16	35	52	27	51	27	65	69	45	2	38	14	36	95	44	23	79	20	13	51	4	37	2	17	89	32	59	57	13	4	97	37	22		30	17	45		4	40	7	39	43		50	12
Tingidae	7	26	61	44	36	63	28	53	23	64	65	19		19		19	92	17	2	80			26		2			52		54	62	7	1	76	2	3	15	13	24	20		38	48	8	33	17		49	3
Tiphiidae		6	5		3	3		4	1	1	6	2			1		12	2	2	9		1	3		2		1	4	1	1	9	1		10	2	6									4	1		6
Tipulidae	28	51	139	76	95	68	69	150	12	125	124	84	10	53	11	9	137	114	45	139			87		30	16	23	17	132	83	77	53	3	158	30	36		92	75	55		2	97	4	87	92		85	1
Tisbidae					1						1									5			3									1	3	7												4
Tischeriidae		2	8		6	1	4	6	1	7	8	4		3		2	5	5	3	7	3	1	6	1	3		1	3	2	3	8	3		7	3	2		2	2	3		1	4	1	6	4		8
Titanoecidae	1		3		1	7	2	3	1	4	4				1		7	2	2	9					1	1	1	6	1	3	4			5	1		1		2			2	2	1	1	1		2
Tobrilidae			11		2	2		6		9	19	5	1	1			5	2		10			3		4					2	12			13	4	7		2							9			14
Tomoceridae		5	9	6	5	8		7		6	10	1				1	7	6		11			4	2					1	5	6	3	2	9					1	4					4	5	3	6	3
Torrenticolidae
Tortricidae	23	175	533	163	363	269	1	483	48	471	512	386	13	365	17	48	426	402	125	574	170	10	373	3	178	1	4	211	32	57	463	214	11	596	178	229	83	341	268	382	1	3	199	51	364	360	2	449	14
Torymidae	1	1	76	9	15	12		10	3	114	99	27		1		8	48	19	2	114			111	4	6			12	1	56	110	21		50	6	4		2		1		34	16		54	6		28
Trachelipodidae		4	13	7	3	4		5		9	10	3		2			3	1	1	2			1		1	2		30	1	14	11			16	1	4		2		2		3	2		4	2		8
Trachygonidae			4	1				1			1																			2	1
Trachypachidae														1				1																												1
Trachyuropodidae
Travassosinematidae			2								3						2			2
Travuniidae
Trematuridae
Trhypochthoniidae			7					3			1	1					3	8		1			3					1			2			2											2	1		7
Triaenophoridae		1	6			3		3		5	4	4		1			1	4		3			4					1			1	2	2	3				4		3			2			6	1	4
Trichinellidae		1	1			2	1	1		1	2	3		3			4	3		6			1					1						5				3		1					2	2	1	3
Trichoblaniulidae																	1			3					1									1	1						1
Trichocercidae
Trichoceridae	11		12	3	7	1		25		31	19	10	2			1	5	14		10			11		1						24		2	11	1	2		13		4					10	3	6	29
Trichodectidae											12						6	4																5														7
Trichodoridae			1		11	6	1	5		2	15	5		1			13	1		11			13					2			5	1		14				1		1					11	3		11	3
Trichogrammatidae		1	7		2	25	5	9	1	26	25	21		1			14	1	2	47			34	3	1			11		6	31			38	1	2		3		3		14	1		11	2		31	1
Trichonemasomatidae																												1
Trichoniscidae		2	30	23	8	36		17		14	16	10	1		9	2	63	10	16	94		1	15	6	15		1	38	9	30	14	12	1	96	15	15			1			1	7	6	9	7		9	4
Trichopolydesmidae						2											1			4					1									1	1							1
Trichopsocidae			1		1			2	1		2					1	3	1		2			2					1		1	1	1		2					1	1					1			2	1
Trichosomoididae						1									1		1		1				1					1						3				1										2	1
Trichostrongylidae		3			19	19	14	2	5	1	13	4		14		1	29	3		27			26		5			5			15	2	8	41	5	8		10		2					29	3	7	37	9
Trichotriidae
Trichuridae		3	1		3	4	5	2	3		8	2		7	1		11		1	10			7		1			1			4	1	3	10	1	2		4		1					2			12	4
Tridactylidae		1	2	1		2		2	1	2					1		3			1							1	3		1	2			1								3	2
Trigonalidae					1			1		1	1									1			1					1						1											1			1
Trigonostomidae					1						11	2					6	6		4			1										1												6	1
Trimenoponidae											1							1																														1
Trionychidae
Triopsidae			2	1	2	2		1		2	2	2			2		2	1	1	2			1		2			1		1	2		1	3	2	2							1	1	2	1	1	2
Triozidae			49	1	14	14		55	6	48	43	16			9	5	18	25		54	5		21		10			14	1	2	3	2		63	10	17			1			24		9	5	25		38	1
Tripylidae			7		3	4				8	7			2									1		4						8			10	4	4		2				1			8			11
Trissexodontidae									1						1	1	25		1	3		6			1	1		1		1				1	1	1								1					3
Trixoscelididae	4		3		2	3		4		5	5	4			3	7	13	4		3			5				1			1	7	2		6		2		4		4			6		4	3		4	2
Trizetidae
[truncated: 104 more rows]
[truncated: 20 more columns]

## Sheet: Taxon groups versus areas
Taxon group / Country code	AD	AL	AT	BA	BE	BG	BY	CH	CY	CZ	DE	DK-DEN	DK-FOR	EE	ES-BAL	ES-CNY	ES-SPA	FI	FR-COR	FR-FRA	GB-CI	GB-GI	GB-GRB	GB-NI	GR-AEG	GR-CYC	GR-DOD	GR-GRC	GR-KRI	HR	HU	IE	IS	IT-ITA	IT-SAR	IT-SI	LI	LT	LU	LV	MC	MD	MK	MT	NL	NO-NOR	NO-SVA	PL	PT-AZO
Acari: Acariformes	2	9	841	143	135	416	24	439	39	492	1028	278	12	36	3	48	1199	615	28	769	1	4	731	10	69	3	14	344	15	146	1009	106	19	1333	69	115	1	43	47	78	2	66	58	5	359	257	21	1388	11
Acari: Ixodida		14	7	3	14	36	8	21	10	23	27	14	1		2	12	33	2	16	40	2	1	24	1	20	4	10	25	9	14	10	10	3	35	20	16		1	1	1		5	13		8	10	1	19	11
Acari: Mesostigmata
Amphibians & Reptiles	21	53	33	48	26	51	20	33	28	29	36	24	1	16	20	18	76	10	21	69	9	20	19	4	27	24	23	68	19	52	32	7	2	73	27	32	7	17	20	18	5	30	41	15	25	9		27	4
Annelida: Hirudinea			37	19	1	19	14	2	1	21	44	16		11			21	12	1	25			13	4	8			18		24	24	6	3	27	8	4		13	12	11		13	34	1	16	2		30
Annelida: Oligochaeta (limnic)		24	67	55	54	74	62	65		77	92	50	10	79	1	11	92	55	13	117			67	32	20			34	4	41	67	34	14	89	20	13		52	31	60	1	66	52		83	48	1	82	7
Annelida: Oligochaeta (terres.)	9	20	105	54	44	54	15	79		90	152	109	8	46	18	35	173	74	30	219	18	1	97		30	1	17	53	8	72	110	106	41	165	30	33		17		19		21	60	1	83	55	27	126	14
Apterygote Insecta		6	26	1	2	16		41	11	8	17	5	1	3	21	16	95	5	12	46			8		14	12	8	24	6	15	10	5	2	63	14	23	2		5		5		4	11	7	4		10	6
Araneae	203	39	993	92	725	978	415	958	55	863	1048	535	4	505	185	484	1156	634	518	1500	102	6	674	262	326	156	290	758	307	687	772	411	84	1488	326	370	530	452	50	437	1	292	638	135	628	561	20	815	131
Aves	197	339	414	300	423	379	303	392	338	381	492	444	261	335	337	340	485	434	248	536	275	309	569	229	252	246	274	423	268	352	371	426	337	469	252	281		319	262	326		295	311	344	468	455		427	227
Bryozoa (Ectoprocta)			10		11	11	10	9		10	16	10		7		2	8	7	2	13			16	7	5			3	1	1	10	12	4	18	5				9	7					11	9	1	12	1
Cnidaria: Hydroida		3	4	3	13	14	6	5		5	31	18	3	5	2		6	18	8	23	3	2	32	6						2	2	16	15	16		1	5	2		1					24	25	5	1
Coleoptera 1	167	1231	3628	2333	1790	2727	868	2746	769	2885	3253	1827	54	1275	521	877	4407	1657	1307	5022	38	112	2005	277	1409	194	287	3144	546	2725	2983	606	87	5621	1409	1775	277	1107	590	1320	55	800	1226	295	1808	1521	13	2881	189
Coleoptera 2	381	1477	2885	2255	1675	2635	1435	2341	884	2443	2746	1546	51	1274	777	1031	3906	1534	1366	3935	107	130	1594	412	1594	371	546	3056	772	2576	2651	719	88	4392	1594	1888	845	1214	960	1439	127	1169	1415	564	1601	1351	9	2446	219
Collembola	4	105	448	106	106	169	38	308	2	223	382	123	22	36	40	101	593	209	59	610	2		288	49	41		36	47	76	98	274	132	76	371	41	83	1	52	16	107	1	70	3	37	86	261	76	403	67
Crustacea	43	127	402	131	290	364	58	298	30	319	595	174	34	111	173	98	630	300	147	817	12	7	412	111	248	39	45	433	94	265	345	200	107	921	248	193	9	127	59	144	7	53	280	50	254	285	25	426	70
Diplura		2	21	9	7	5		18	1	9	16	7			9	5	53	2	18	83			12		21	1	25	36	7	5	8	1		67	21	19							2	2		1		11	3
Diptera	210	258	2279	299	1389	1155	317	2115	156	2502	3711	1306	129	1044	155	246	1732	2288	785	2755	121	1	2765	514	275	43	104	571	302	493	1622	1315	123	2117	275	333	24	993	311	1024	6	126	343	55	1687	1634	84	2142	83
Diptera: Brachycera	627	633	4603	695	2905	2311	601	4342	493	4830	5587	3033	158	1370	432	855	4058	3525	920	4920	121	29	4078	499	677	92	254	1889	454	1437	4212	1718	221	4893	677	1211	272	1462	289	1119	11	490	664	436	3051	2783	25	4406	266
Entoprocta					1						1									1											1
Ephemeroptera		17	115	44	12	109	3	85		96	116	43		8	9	7	139	52	19	128	6		51	30	21	1	8	58	3	34	54	33		96	21	30		57	44	43			68		65	45		114
Gastrotricha		1	18		5	23		37	1	6	90	27		6	1		4	2	1	37			57	2	33			2		1	32		1	83	33			1								4		97
Helminths (Animal parasitics)		193	278	11	116	1079	334	248	18	643	1066	184	5	178	85	54	899	247	52	779	4		849	11	56	2		125	2	5	696	107	214	948	56	54	2	422		286	1	248	4	7	194	217	29	1197	64
Hemiptera: Aphidoidea	160	14	515	63	370	427	266	377	55	681	709	466	16	228	96	113	607	437	164	651	8		646	27	174			153	7	126	463	217	48	682	174	390	1	292	2	385	1	350	121	2	369	346	4	703	126
Hemiptera: Cicadomorpha etc.	7	158	578	46	335	487	12	474	144	550	611	311		288	35	166	453	321	72	774	6	2	378		213	24	25	579	62	95	426	157	5	717	213	320	2	276	2	318	2	251	24	5	363	275		490	27
Hemiptera: Coccoidea etc.		9	214	2	104	159	14	272	67	215	340	127	1	5	47	145	298	111	89	563	54	3	241	2	141	5	8	188	74	69	220	46	5	529	141	219	1	8	10	37	4	124	12	89	169	97		290	37
Hemiptera: Heteroptera	248	539	887	672	632	1037	486	785	437	843	887	503	5	468	8	389	1383	499	40	1283	19		577		51	4	18	1042	64	853	829	296	9	1221	51	85	338	335	514	397		554	776	213	624	449		727	58
Hymenoptera: Symphyta + Ichneumo	195	217	3989	116	2390	3025	334	2620	180	3101	5608	1105	161	648	63	290	2441	3910	594	4208	3	4	3999	64	286	12	62	766	188	671	4346	1945	152	3426	286	414	43	1013	431	1541		1001	293	29	3076	2014	20	4022	51
Lepidoptera	885	1721	4020	1914	2437	2988	1359	3591	772	3402	3621	2522	111	2338	510	681	4522	2545	1469	4948	1268	423	2440	586	1565	171	400	3121	915	2497	3474	1350	99	4818	1565	1932	721	2237	1604	2447	26	766	2570	619	2369	2213	6	3174	148
Mammalia		68	100	82	67	98	75	85	27	85	88	56	5	60	28	20	93	66	37	109	19	8	57	29	37	12	29	89	34	95	82	34	16	99	37	40	42	61	59	63		73	84	16	62	64	10	92	7
Mecoptera	2	4	8	8	8	4	3	7		6	9	4		4			4	6		9			4					5	1	6	7	1		11		2	4	6	5	7			2		6	5		8
Mollusca: Bivalvia		6	30	4	26	22	4	27		25	35	25	9	26	2	1	29	27	6	35			32	17	1			11	1	8	24	18	12	22	1	7	10	23	21	25			11	2	28	27		30	1
Mollusca: Gastropoda	115	331	341	241	175	312	58	253	80	225	328	140	28	110	136	271	531	115	138	619	86	37	187	109	130	94	126	563	171	442	232	145	39	561	130	181	122	131	147	131		62	252	74	171	125		234	115
Myriapoda	12	104	273	217	109	201	31	213	26	150	211	85	7	21	45	118	329	58	100	451	38	12	141	42	96	28	68	239	56	260	146	69	14	637	96	95		38	71	28	43	45	91	33	95	69		147	34
Nematomorpha			10	4	9	6		5		7	31			2			7	3	2	9	1		7	2	3					12		2		14	3	1						1						10
Nemertea			3	1		1		2		1	5	1				2				2			4	1								1													2			1	2
Odonata		51	74	2	68	68	57	76	28	68	80	53		54	22	10	69	53	42	84	28		49	15	42	19	36	58	31	70	65	21	1	83	42	52	35	57	61	57		41	53	9	71	46		72	4
Opiliones
Orthopteroid orders	21	144	157	183	63	228	45	134	82	114	105	46	2	39	91	161	444	41	97	248	28		57	11	158	49	98	321	86	205	144	23	5	336	158	176	42	52	56	50		107	187	67	61	34		95	39
Palpigradi, PsScorp & Solifugae	1	18	71	53	21	57		43	17	37	50	19	1	2	44	49	151	16	38	121	8		28	11	88	13	25	97	37	101	43	17	2	189	88	56			2	11		4	45	24	18	16		38	9
Phthiraptera	3							22			411				9	4	204	284				1			53						261			216	53	1												350
Pisces		51	63	49	56	99	37	69	21	68	83	49	3	51	78	2	78	56	90	90	6	14	77	6	95	88	88	88	88	70	66	35	11	95	95	95	12	55	12	53	8	52	26	11	61	47		67	1
Plecoptera	41	5	122	76	55	97	9	106	3	111	123	25		16	3		135	38	11	160	1		33	8	9	5	3	51	7	21	71	20	1	142	9	28		25	48	41			103		36	35		113
Porifera: Spongillidae			4	4	4	6	1	5		6	8	4	2	3	1		2	4	3	5			5	5	4			3	1	6	6	5	1	5	4	1		1		3			5		6	5		9
Protura			54	15		2		7		30	41	2		1	6	11	20	1	10	31			8		9			10		2	4	2		35	9			2	30	1						1		69	2
Psocoptera		4	70		72	22		100	46	1	96	31		1		61	102	66	3	108			94	1	4	5	1	70	3	54	67	44	3	99	4	3			65	42			1	6	54	53		74	34
Rotifera: Monogononta		3	188		53	17	2	79		6	190	1	2	1	40	45	51	16		71			120		14		19				81	70	28	80	14	1				8		10	1		104	24	39	82
Scorpiones		4	3	3		2		3	1						2	1	4		2	5			1		2	1	3	7	1	6	1			8	2	1					1		1	1
Siphonaptera	19	4	43	10	46	35	1	71	7	50	76	50	51	5	16	16	67	23	25	86	15	3	55	1	19	1	1	57	3	12	61	41	6	79	19	23	2	5	21	4	2	2	13	9	46	36	1	77	13
Strepsiptera		3	7	3	5	2		6	3	8	15	3		1	1	7	12	4		13			10	1	3			6	3	8	15	1		12	3	7			1				1	1	1	3		5
Tardigrada	4	1	111		2	34		58	2	59	62	25	26		3	7	69	58	18	64	15	1	73	1	58			50	27	51	124	37	53	204	58	77								1	11	66	75	98	5
Thysanoptera	6	73	198	20	18	137	4	115	60	247	233	106	1	32	8	100	294	115	32	251			179		40	1		106	25	113	203	23	10	220	40	81	1	48	3	66		51	42	4	143	101		201	40
		1	143	18	22	33	1	85		76	240	55	26	42	6	1	129	172	9	134			73	2	10	2	2	12	4	12	20	45	40	171	10	3		5	8	22	2		46		45	13		163	5
	54	97	304	178	201	246	114	301	27	249	313	169	19	113	19	16	294	209	73	349	47	1	195	74	73	46	22	246	41	153	211	143	11	359	73	95	61	166	128	185		6	104	2	174	185	1	271	3
	193	420	2558	258	1118	1435	277	1893	692	2926	3844	1545	16	222	362	523	3758	1275	685	3760	153	113	3153	161	791	126	444	1950	535	1288	3376	581	50	3446	791	1270	54	527	550	238	38	1072	521	235	1040	671	4	1651	43
			406		308	100	4	156	62	457	823	47	4	168	19	46	614	22	3	141	1		117	1	77			21	1	28	688	14	6	634	77	134	1	147	2	53		70	2	15	596	49	24	799	30
	22	38	120	24	42	122	14	121	7	98	115	62	1	35	6	29	190	62	28	166		2	76		58	3	14	136	14	91	128	30	1	174	58	58	65	26	28	43		39	32	27	62	62		96	6
[truncated: 20 more columns]
