# Supplementary material for: Fauna Europaea – all European animal species on the web
Source: Biodivers Data J. 2014 Sep 17;(2):e4034. doi: 10.3897/BDJ.2.e4034 (PMC4206781; doi:10.3897/BDJ.2.e4034)
Supplement: Supplementary material 8 — Fauna Europaea Endemics [file biodiversity_data_journal-2-e4034-s008.xlsx]

## Sheet: Species endemics
Not excluding species also occuring in extralimital areas			Excluding species also occuring in extralimital areas
Country / Area	Species number		Country / Area	Species number
Albania	273		Albania	269
Andorra	36		Andorra	34
Austria	1175		Austria	1152
Azores	288		Azores	263
Balearic Is.	316		Balearic Is.	299
Belarus	27		Belarus	26
Belgium	107		Belgium	95
Bosnia and Herzegovina	501		Bosnia and Herzegovina	493
Britain I.	1135		Britain I.	1014
Bulgaria	1177		Bulgaria	1092
Canary Is.	3273		Canary Is.	3066
Channel Is.	3		Channel Is.	2
Corsica	570		Corsica	550
Crete	742		Crete	690
Croatia	597		Croatia	585
Cyclades Is.	131		Cyclades Is.	128
Cyprus	942		Cyprus	613
Czech Republic	331		Czech Republic	304
Danish mainland	111		Danish mainland	103
Dodecanese Is.	341		Dodecanese Is.	258
Estonia	30		Estonia	28
European Turkey	267		European Turkey	180
Faroe Is.	19		Faroe Is.	19
Finland	460		Finland	406
Franz Josef Land	2		Franz Josef Land	1
French mainland	3624		French mainland	3493
Germany	2092		Germany	1976
Gibraltar	21		Gibraltar	15
Greek mainland	2876		Greek mainland	2577
Hungary	1000		Hungary	927
Iceland	88		Iceland	71
Ireland	51		Ireland	45
Italian mainland	4609		Italian mainland	4397
Kaliningrad Region	40		Kaliningrad Region	32
Latvia	63		Latvia	57
Liechtenstein	4		Liechtenstein	4
Lithuania	58		Lithuania	51
Luxembourg	18		Luxembourg	18
Macedonia	448		Macedonia	441
Madeira	978		Madeira	952
Malta	120		Malta	99
Moldova, Republic of	181		Moldova, Republic of	158
Monaco	8		Monaco	6
North Aegean Is.	181		North Aegean Is.	138
Northern Ireland	2		Northern Ireland	2
Norwegian mainland	153		Norwegian mainland	126
Novaya Zemlya	67		Novaya Zemlya	46
Poland	875		Poland	802
Portuguese mainland	707		Portuguese mainland	670
Romania	1220		Romania	1174
Russia Central	464		Russia Central	394
Russia East	360		Russia East	287
Russia North	299		Russia North	205
Russia Northwest	159		Russia Northwest	134
Russia South	1327		Russia South	742
San Marino	1		San Marino	1
Sardinia	766		Sardinia	731
Selvagens Is.	31		Selvagens Is.	31
Sicily	919		Sicily	763
Slovakia	218		Slovakia	200
Slovenia	326		Slovenia	326
Spanish mainland	6872		Spanish mainland	6176
Svalbard & Jan Mayen	54		Svalbard & Jan Mayen	38
Sweden	635		Sweden	551
Switzerland	541		Switzerland	518
The Netherlands	283		The Netherlands	246
Ukraine	1766		Ukraine	1512
Vatican City	5		Vatican City	5
Yugoslavia	682		Yugoslavia	654

## Sheet: Subspecies endemics
Not excluding species also occuring in extralimital areas			Excluding species also occuring in extralimital areas
Country / Area	Subspecies number		Country / Area	Subspecies number
Albania	118		Albania	118
Andorra	3		Andorra	3
Austria	126		Austria	126
Azores	25		Azores	25
Balearic Is.	73		Balearic Is.	73
Belgium	2		Belgium	2
Bosnia and Herzegovina	230		Bosnia and Herzegovina	230
Britain I.	37		Britain I.	37
Bulgaria	144		Bulgaria	144
Canary Is.	286		Canary Is.	286
Channel Is.	1		Channel Is.	1
Corsica	78		Corsica	78
Crete	174		Crete	174
Croatia	242		Croatia	242
Cyclades Is.	25		Cyclades Is.	25
Cyprus	118		Cyprus	118
Czech Republic	23		Czech Republic	23
Danish mainland	2		Danish mainland	2
Dodecanese Is.	72		Dodecanese Is.	72
Estonia	1		Estonia	1
European Turkey	12		European Turkey	12
Faroe Is.	5		Faroe Is.	5
Finland	28		Finland	28
French mainland	780		French mainland	780
Germany	102		Germany	102
Gibraltar	1		Gibraltar	1
Greek mainland	497		Greek mainland	497
Hungary	38		Hungary	38
Iceland	9		Iceland	9
Ireland	4		Ireland	4
Italian mainland	891		Italian mainland	891
Latvia	1		Latvia	1
Macedonia	69		Macedonia	69
Madeira	112		Madeira	112
Malta	27		Malta	27
Monaco	1		Monaco	1
North Aegean Is.	20		North Aegean Is.	20
Northern Ireland	3		Northern Ireland	3
Norwegian mainland	10		Norwegian mainland	10
Novaya Zemlya	1		Novaya Zemlya	1
Poland	62		Poland	62
Portuguese mainland	67		Portuguese mainland	67
Romania	324		Romania	324
Russia Central	5		Russia Central	5
Russia East	20		Russia East	20
Russia North	7		Russia North	7
Russia Northwest	6		Russia Northwest	6
Russia South	63		Russia South	63
Sardinia	124		Sardinia	124
Selvagens Is.	4		Selvagens Is.	4
Sicily	224		Sicily	224
Slovakia	37		Slovakia	37
Slovenia	172		Slovenia	172
Spanish mainland	790		Spanish mainland	790
Svalbard & Jan Mayen	2		Svalbard & Jan Mayen	2
Sweden	24		Sweden	24
Switzerland	42		Switzerland	42
The Netherlands	10		The Netherlands	10
Ukraine	97		Ukraine	97
Yugoslavia	203		Yugoslavia	203
