# Supplementary material for: Fauna Europaea – all European animal species on the web
Source: Biodivers Data J. 2014 Sep 17;(2):e4034. doi: 10.3897/BDJ.2.e4034 (PMC4206781; doi:10.3897/BDJ.2.e4034)
Supplement: Supplementary material 11 — Fauna Europaea higher hierarchy - version 2.6.2 [file biodiversity_data_journal-2-e4034-s011.xlsx]

## Sheet: FaEu Hierary v.2.6.2
Taxon name	Author	Year	Rank	Synonym name	Synonym author	Synonym year	Tax_id	Tax_tax_idparent
Aaroniellinae			Subfamily				169554	16416
Abacetini			Tribe				380493	380487
Abiinae			Subfamily				354086	11293
Abraeinae			Subfamily				119843	11102
Abraeini			Tribe				119844	119843
Abraxini			Tribe				445504	445503
Abrolophinae			Subfamily				91776	15709
Abrostolini			Tribe				449517	449516
Acaenitinae			Subfamily				336363	11277
Acalyptini			Tribe				250852	250212
Acalyptonotidae			Family				15695	15603
Acalyptonotinae			Subfamily				174331	15695
Acanthaclisini			Tribe				85558	85557
Acanthinulinae			Subfamily				431133	11430
Acanthobdellea			Class				11258	11252
Acanthobdellida			Order				11259	11258
Acanthobdellidae			Family				11260	11259
Acanthocephala			Phylum				15463	54070
Acanthocnemidae			Family				11034	11029
Acanthocolpidae			Family				54110	16268
Acanthocolpidae			Family	Deropristidae			305753	54110
Acanthodrilidae			Family				11880	11878
Acantholipini			Tribe				446583	446517
Acanthopsychini			Tribe				432460	432459
Acanthopteroctetidae		1978	Family				16710	16715
Acanthopteroctetoidea		1978	Superfamily				16715	7
Acanthoscelidina			Subtribe				243715	243569
Acanthosomatidae			Family				12858	12851
Acanthosomatinae			Subfamily				453893	12858
Acanthostomidae			Family				54111	16268
Acarapinae			Subfamily				229560	15803
Acarapini			Tribe				229561	229560
Acari			Infraclass				10616	15579
Acaricalini			Tribe				93533	93532
Acaridae			Family				15810	15637
Acaroidea			Superfamily				15637	15595
Acaronychidae			Family				15919	15648
Acarophenacidae			Family				15785	15631
Acartiidae			Family				14778	13272
Acartophthalmidae			Family				10879	10878
Accipitri			Suborder				10748	10747
Accipitridae			Family				10750	10749
Accipitroidea			Superfamily				10749	10748
Acentrini			Tribe				251121	250212
Acentropinae			Subfamily				443032	16942
Acerentomata			Suborder				12100	12099
Acerentomidae			Family				12103	12100
Aceriini			Tribe				94120	94119
Achanthipterinae			Subfamily				139314	10928
Achatinoidea			Superfamily				11440	11419
Acherontacaridae			Family				15716	15610
Acherontacarinae			Subfamily				173089	15716
Acherontiini			Tribe				443837	443836
Achilidae			Family				15886	15869
Achilinae			Subfamily				152055	15886
Achilini			Tribe				152056	152055
Achipteriidae			Family				15992	15679
Achromadoridae			Family				11747	16796
Aciculidae			Family				11382	11379
Aciliini			Tribe				119179	119178
Acipenseridae			Family				12011	12010
Acipenseridae			Family	sturgeons			12012	12011
Acipenseriformes			Order				12010	12009
Aclerdidae			Family				12497	12496
Acletoxina			Subtribe				61563	61562
Acmaeoderini			Tribe				102613	102612
Acoela			Order				14227	14226
Acoleidae			Family				16192	16188
Acontiinae			Subfamily				449458	8769
Acontiini			Tribe				449459	449458
Acrididae			Family				11904	11903
Acridinae			Subfamily				402757	11904
Acridoidea			Superfamily				11903	11898
Acritini			Tribe				119900	119843
Acrobothriidae			Family				16212	16183
Acroceridae			Family				10880	10878
Acrolepiinae			Subfamily				434071	1579
Acroloxidae			Family				11405	11404
Acroloxoidea			Superfamily				11404	11403
Acronictinae			Subfamily				449403	8769
Acrotrichinae			Subfamily				191393	11106
Actaletidae			Family				11197	11196
Acteophila			Suborder				11416	11402
Actinolaimidae			Family				11777	16805
Actinopterygii			Class				12006	12005
Actinopterygii			Class	Osteichthyes s.s.			12007	12006
Actinopterygii			Class	bony fishes			12008	12006
Actinotiini			Tribe				447347	447193
Actinotrichida			Superorder				15592	10616
Acuariidae			Family				16872	16862
Acuarioidea			Superfamily				16862	16861
Adamystidae			Family				15691	15601
Adamystinae			Subfamily				91692	15691
Adamystoidea			Superfamily				15601	15597
Adelgidae			Family				12357	12355
Adelidae		1850	Family				342	431645
Adeliinae			Subfamily				342011	11276
Adeliini			Tribe				282328	282327
Adelinae			Subfamily				432307	342
Adelognathinae			Subfamily				336323	11277
Adeloidea		1850	Superfamily				431645	7
Adelphacaridae			Family				15945	15657
Adenophorea			Class				11729	11682
Adephaga			Suborder				11003	10993
Aderidae			Family				11089	11067
Aderidae			Family	Euglenesidae			11090	11089
Aderidae			Family	Xylophilidae			11091	11089
Adesmiini			Tribe				280384	280383
Adiheterothripidae			Family				12233	12230
Adinetida			Order				12174	12173
Adinetidae			Family				12175	12174
Adoretini			Tribe				247263	247143
Adoxini			Tribe				240908	240901
Adramini			Tribe				405700	405699
Adrianichthyidae			Family				304297	304296
Adrianichthyoidei			Suborder				304296	304295
Aediini			Tribe				449484	449458
Aedini			Tribe				134911	134910
Aegialiidae			Family				11125	11115
Aeginidae			Family				16966	16792
Aegithalidae			Family				10863	16719
Aegithaloidea			Superfamily				16719	10848
Aelini			Tribe				454051	454050
Aenictequoidea			Superfamily				243871	12445
Aenictinae			Subfamily				81556	11356
Aeolosomatidae			Family				16350	16349
Aeolothripidae			Family				12232	12230
Aepina			Subtribe				382504	382488
Aepophilidae			Family				12820	12819
Aeroglyphidae			Family				15835	15640
Aeshnidae			Family				11842	11841
Aeshnidae			Family	Aeschnidae			11843	11842
Aeshnoidea			Superfamily				11841	11840
Aetalionidae			Family				15879	15872
Aetholaimidae			Family				15034	16809
Agabinae			Subfamily				119268	11011
Agabini			Tribe				119269	119268
Agalliinae			Subfamily				195773	15880
Agalliini			Tribe				195774	195773
Agalmatiina			Subtribe				239725	239724
Agamidae			Family				15567	15561
Agaonidae			Family				11308	11307
Agaoninae			Subfamily				67599	11308
Agathidiini			Tribe				120892	120723
Agathidinae			Subfamily				339574	11276
Agdistinae			Subfamily				438309	5345
Agelenidae			Family				10672	10636
Ageniellini			Tribe				198821	198595
Agfidae			Family				12382	12377
Aglaopini			Tribe				440212	440211
Agleninae			Subfamily				124697	11087
Agliinae			Subfamily				443625	6791
Aglycyderinae			Subfamily				258320	11174
Agnatha			Infraphylum				11998	16752
Agnathinae			Subfamily				124636	11086
Agrilinae			Subfamily				102140	11145
Agrilini			Tribe				102141	102140
Agriolimacidae			Family				11469	11465
Agriolimacinae			Subfamily				421532	11469
Agriotypinae			Subfamily				336320	11277
Agromyzidae			Family				10881	10878
Agromyzinae			Subfamily				128653	10881
Agrotina			Subtribe				448436	448435
Agyrtidae			Family				11108	11103
Agyrtinae			Subfamily				186290	11108
Ailoscolecidae			Family				11876	11872
Akicerinae			Subfamily				402823	11905
Akidini			Tribe				280387	280383
Alaimidae			Family				11763	16811
Alaimina			Suborder				16810	11756
Alaimoidea			Superfamily				16811	16810
Alaudidae			Family				10870	16720
Alaudoidea			Superfamily				16720	10848
Albiinae			Subfamily				174213	15720
Alcedini			Suborder				10819	10818
Alcedinidae			Family				10824	10823
Alcedinoidea			Superfamily				10823	10819
Alcidae			Family				10785	16759
Alcoidea			Superfamily				16759	10770
Alebrini			Tribe				194859	194858
Aleocharinae			Subfamily				265571	11113
Aleureodamaeidae			Family				15965	15667
Aleuropteryginae			Subfamily				85363	11826
Aleuropterygini			Tribe				85364	85363
Alexiidae			Family				11059	11037
Alexiidae			Family	Sphaerosomatidae			11060	11059
Aleyrodidae			Family				12495	12494
Aleyrodoidea			Superfamily				12494	12354
Alfieriellinae			Subfamily				188105	11050
Alfieriellini			Tribe				188106	188113
Algophagidae			Family				15841	15641
Alicorhagiidae			Family				15750	15620
Alirhabditidae			Family				54099	12377
Allantinae			Subfamily				355736	11295
Allantonematidae			Family				12392	12389
Alleculinae			Subfamily				282148	11077
Allocreadiidae			Family				16272	16265
Allocreadioidea			Infraorder				16265	16244
Allodahlinae			Subfamily				347980	11934
Alloionematidae			Family				12384	12383
Alloionematoidea			Superfamily				12383	16851
Alloptidae			Family				15815	15637
Alloptinae			Subfamily				92589	15815
Alloxystini			Tribe				80312	80311
Almanini			Tribe				239589	239588
Alomyinae			Subfamily				336313	11277
Alomyini			Tribe				336314	336313
Alophini			Tribe				254803	251561
Alopiinae			Subfamily				423153	11439
Alopiini			Tribe				423154	423153
Alphitobiini			Tribe				281141	281140
Alsophilinae			Subfamily				446358	7520
Alticinae			Subfamily				242680	11097
Alucitidae		1815	Family				5325	5324
Alucitoidea		1815	Superfamily				5324	7
Alycidae			Family				15751	15620
Alycoidea			Superfamily				15620	15598
Alydidae			Family				12848	12846
Alydinae			Subfamily				453682	12848
Alysiinae			Subfamily				340142	11276
Alyssontini			Tribe				196890	196889
Amabiliidae			Family				16193	16188
Amaurobiidae			Family				10676	10636
Amaurocorini			Tribe				453787	453786
Amauronioidini			Tribe				449935	449934
Amauropini			Tribe				266624	266623
Amblicerina			Subtribe				243741	243740
Amblicerini			Tribe				243740	243562
Amblycera			Suborder				11940	11939
Amblyommidae			Family				10623	10621
Amblyomminae			Subfamily				95232	10623
Amblypygi			Order				10624	15593
Amblystomina			Subtribe				380249	379650
Ameiridae			Family				14787	13276
Ameletidae			Family				16940	11218
Ameridae			Family				15909	15646
Amerobelbidae			Family				15910	15646
Amerobelboidea			Superfamily				15646	15596
Ameronothridae			Family				15916	15647
Ameronothroidea			Superfamily				15647	15596
Ameroseiidae			Family				12472	12467
Ametropodidae			Family				11219	11218
Amidostomidae			Family				16909	16896
Ammophilini			Tribe				196170	11303
Amnicolinae			Subfamily				427876	11497
Amorphoscelididae			Family				11919	11918
Amphibia			Class				15454	12005
Amphientometae			Infraorder				12138	12137
Amphientomidae			Family				12140	16417
Amphientominae			Subfamily				169328	12140
Amphientomoidea			Superfamily				16417	12138
Amphigerontiinae			Subfamily				169626	12165
Amphilinidae			Family				16182	16180
Amphilinidea			Superorder				16180	16179
Amphinemurinae			Subfamily				86085	12094
Amphipoda			Order				13291	13288
Amphipsocidae			Family				12154	16415
Amphipsocinae			Subfamily				169446	12154
Amphipsyllinae			Subfamily				170733	12228
Amphipsyllini			Tribe				170734	170733
Amphipyrinae			Subfamily				449241	8769
Amphisbaenia			Suborder				15562	15548
Amphisbaenidae			Family				15564	15562
Ampulicidae			Family				11299	11298
Ampulicini			Tribe				67082	11299
Ampullarioidea			Superfamily				11383	11378
Anacampsini			Tribe				437750	436897
Anacharitinae			Subfamily				80569	11333
Anactinotrichida			Superorder				10617	10616
Anajapygidae			Family				15584	15583
Analgidae			Family				15816	15637
Analginae			Subfamily				92687	15816
Analgoidea			Superfamily				54063	15595
Anamorphinae			Subfamily				399060	11061
Anapidae			Family				10658	10636
Anapidae			Family	Mysmenidae			10660	10658
Anapidae			Family	Symphytognathidae			10659	10658
Anapleini			Tribe				119989	119964
Anaspidinae			Subfamily				192444	11092
Anaspidini			Tribe				192445	192444
Anataelinae			Subfamily				348035	11930
Anatidae			Family				10712	16756
Anatoidea			Superfamily				16756	10709
Anatonchidae			Family				11773	16831
Anatonchoidea			Superfamily				16831	16830
Anatopyniini			Tribe				409357	409291
Ancylostomatidae			Family				16897	16892
Ancylostomatoidea			Superfamily				16892	12408
Ancyrocephalidae			Family				16221	16224
Andrassyidae			Family				15032	16819
Andrenosomini			Tribe				60213	60212
Andrognathidae			Family				11513	11512
Anechurinae			Subfamily				347938	11934
Anemadina			Subtribe				122805	122804
Anemadini			Tribe				122804	121128
Anerastiini			Tribe				442426	441766
Aneurinae			Subfamily				452933	12839
Angeronini			Tribe				445513	445503
Angiostomatidae			Family				12381	12377
Angiostrongylidae			Family				16899	16894
Anguidae			Family				15565	15561
Anguillicolidae			Family				16990	16860
Anguillidae			Family				12016	12015
Anguillidae			Family	freshwater eels			12017	12016
Anguilliformes			Order				12015	16347
Anguinidae			Family				11686	16924
Anguinoidea			Superfamily				16924	16921
Anillina			Subtribe				384451	384450
Animalia			Kingdom				1
Anisakidae			Family				16981	16845
Anisitsiellidae			Family				15728	15614
Anisitsiellinae			Subfamily				173485	15728
Anisodactylini			Tribe				379458	379457
Anisolabididae			Family				11932	11929
Anisopinae			Subfamily				450482	12806
Anisopliini			Tribe				247144	247143
Anisopodidae			Family				11675	11674
Anisopodoidea			Superfamily				11674	11673
Anisoptera			Suborder				11840	11831
Anisoscelini			Tribe				453701	453700
Annelida			Phylum				11252	54070
Annulipalpia			Suborder				12239	12238
Anobiidae			Family				11024	11018
Anobiidae			Family	Ptinidae			243789	11024
Anobiinae			Subfamily				100772	11024
Anomalginae			Subfamily				92681	15816
Anomalini			Tribe				247222	247143
Anomaloninae			Subfamily				336200	11277
Anomalonini			Tribe				336201	336200
Anomini			Tribe				446811	446807
Anomologini			Tribe				436916	436897
Anomopoda			Infraorder				13261	13259
Anophelinae			Subfamily				135031	11650
Anopla			Class				16154	16153
Anoplini			Tribe				250862	250212
Anoplocephalidae			Family				16194	16188
Anoplura			Suborder				11971	11939
Anostraca			Order				13254	13253
Anoterostemmatini			Tribe				195482	195481
Anseri			Suborder				10709	10708
Anseriformes			Order				10708	10707
Anserimorphae			Superorder				10707	10700
Antennophoridae			Family				12447	12446
Antennophorina			Suborder				12445	12417
Antennophoroidea			Superfamily				12446	12445
Antennoseiidae			Family				12469	12467
Antequerinae			Subfamily				436781	3091
Antestiini			Tribe				454072	454050
Anthaxiini			Tribe				101247	101246
Anthicidae			Family				11088	11067
Anthicinae			Subfamily				229645	11088
Anthicini			Tribe				229696	229645
Anthoathecatae			Subclass				10982	10981
Anthocharini			Tribe				440840	440839
Anthocoptini			Tribe				93562	93532
Anthocoridae			Family				12833	12831
Anthocorinae			Subfamily				452608	12833
Anthocorini			Tribe				452609	452608
Anthogonidae			Family				11527	11526
Anthogonidae			Family	Anthroleucosomatidae			11528	11527
Anthomyiidae			Family				10882	10878
Anthomyzidae			Family				10883	10878
Anthomyzinae			Subfamily				59542	10883
Anthonomini			Tribe				250654	250212
Anthophagini			Tribe				263923	263922
Anthracinae			Subfamily				130015	10889
Anthracini			Tribe				130016	130015
Anthribidae			Family				11173	11170
Anthribinae			Subfamily				186721	11173
Anthroherponina			Subtribe				121130	121129
Anthroleucosomatidae			Family				11529	11526
Anthroleucosomatidae			Family	Anthroleucosomidae			11530	11529
Antillocorini			Tribe				452943	452942
Antitypina			Subtribe				447871	447660
Antochini			Tribe				145516	145515
Antoniinae			Subfamily				130213	10889
Anura			Order				15534	15454
Anyphaenidae			Family				10678	10636
Anyphaenidae			Family	Amaurobioididae			10679	10678
Anystidae			Family				15692	15602
Anystina			Suborder				15597	15594
Anystoidea			Superfamily				15602	15597
Apameina			Subtribe				447389	447385
Apameini			Tribe				447385	447193
Apataniidae			Family				12260	12259
Apatetrini			Tribe				436898	436897
Apatini			Tribe				101059	101058
Apaturinae			Subfamily				441657	7202
Apaturini			Tribe				441658	441657
Apenini			Tribe				378044	378043
Aphanisticini			Tribe				102384	102140
Aphanoneura			Class				16349	11252
Aphelacaridae			Family				15944	15657
Aphelenchida			Order				11700	11683
Aphelenchidae			Family				11701	16844
Aphelenchina			Suborder				12396	11700
Aphelenchoidea			Superfamily				16844	12396
Aphelenchoididae			Family				12398	16844
Aphelinidae			Family				11309	11307
Aphelininae			Subfamily				67834	11309
Aphelocheiridae			Family				12804	12802
Apheviderulicidae			Family				15711	15607
Apheviderulicinae			Subfamily				173209	15711
Aphididae			Family				12359	12358
Aphidiinae			Subfamily				339743	11276
Aphidoidea			Superfamily				12358	12354
Aphnaeinae			Subfamily				441216	7033
Aphodiidae			Family				11124	11115
Aphodiinae			Subfamily				98970	11124
Aphoebantini			Tribe				130052	130015
Aphrodinae			Subfamily				195529	15880
Aphrophoridae			Family				15873	15870
Aphyllurini			Tribe				247795	247743
Apidae			Family				11300	11298
Apionacaridae			Family				15817	15637
Apionidae			Family				11179	11170
Apioninae			Subfamily				245611	11179
Apionini			Tribe				245617	245611
Aplemonini			Tribe				245649	245611
Aplexinae			Subfamily				430453	11409
Apochela			Order				12698	12690
Apocleinae			Subfamily				59601	10884
Apocrita			Suborder				11274	11273
Apoderinae			Subfamily				235323	11176
Apoderini			Tribe				235324	235323
Apodi			Suborder				10814	10813
Apodidae			Family				10816	10815
Apodiformes			Order				10813	10812
Apodimorphae			Superorder				10812	10713
Apodoidea			Superfamily				10815	10814
Apoidea			Superfamily				11298	11274
Apolysini			Tribe				130448	130447
Aporcelaimidae			Family				11791	16805
Aporini			Tribe				197960	197959
Apororhynchida			Order				16163	15464
Apororhynchida			Order	Aporhynchida			54083	16163
Apororhynchidae			Family				16164	16163
Apororhynchidae			Family	Aporhynchidae			54082	16164
Apotominae			Subfamily				385453	11013
Apotomini			Tribe				385454	385453
Aproctidae			Family				16873	16863
Aproctoidea			Superfamily				16863	16861
Apteronini			Tribe				432554	432459
Aptinina			Subtribe				387466	387456
Arachnida			Class				10615	10614
Aradidae			Family				12839	12838
Aradinae			Subfamily				452881	12839
Aradoidea			Superfamily				12838	12837
Araeolaimida			Order				11737	11729
Araeopteronini			Tribe				446518	446517
Araneae			Order				10626	15593
Araneidae			Family				10666	10636
Araneomorphae			Suborder				348068	10626
Archaeopsyllinae			Subfamily				170100	12221
Archeonothridae			Family				15920	15648
Archeonothroidea			Superfamily				15648	15596
Archiacanthocephala			Class				15464	15463
Archiearinae			Subfamily				446346	7520
Archipini			Tribe				439750	439288
Architaenioglossa			Order				11378	11377
Archostemata			Suborder				10994	10993
Arctacaridae			Family				12427	12426
Arctacarina			Suborder				12426	12417
Arctiina			Subtribe				446957	446956
Arctiinae			Subfamily				446880	431650
Arctiini			Tribe				446956	446880
Arctoperlaria			Suborder				12089	12088
Arctopsychidae			Family				16943	12240
Arctornithini			Tribe				447122	447056
Ardeacarinae			Subfamily				93156	15855
Ardeialginae			Subfamily				93151	15855
Ardeidae			Family				10741	16765
Ardeoidea			Superfamily				16765	10739
Argasidae			Family				10620	10619
Argasina			Suborder				10619	10618
Argasinae			Subfamily				95252	10620
Argidae			Family				11291	11290
Arginae			Subfamily				353911	11291
Argnidae			Family				11428	11425
Argulidae			Family				14775	13266
Arguloida			Order				13266	13265
Argynnini			Tribe				441693	441692
Argyresthiidae		1850	Family				431646	1346
Argyrogrammatini			Tribe				449526	449516
Arhynchobdellida			Order				11265	11261
Arhythmacanthidae			Family				15483	15480
Ariantinae			Subfamily				426581	11479
Arionidae			Family				11473	11470
Arioninae			Subfamily				421743	11473
Armadillidae			Family				14848	14847
Armadillidiidae			Family				14849	14847
Armadini			Tribe				449478	449458
Arrenuridae			Family				15696	15603
Arrenurinae			Subfamily				174359	15696
Arrenuroidea			Superfamily				15603	15597
Arrhenodini			Tribe				101242	101236
Arrhopalitidae			Family				11206	11205
Artematopodidae			Family				11158	11157
Artematopodinae			Subfamily				235193	11158
Artemiidae			Family				14752	13254
Artheneinae			Subfamily				453362	12843
Artheneini			Tribe				453363	453362
Arthropleidae			Family				11224	11222
Arthropoda			Phylum				2	54070
Arthrostenini			Tribe				217916	217851
Arthrotardigrada			Order				12676	12675
Artiodactyla			Order				12644	12617
Arytrurini			Tribe				446586	446517
Asaphinae			Subfamily				401961	11320
Ascalaphidae			Family				11821	11818
Ascalaphinae			Subfamily				85230	11821
Ascaridida			Order				12414	11683
Ascarididae			Family				16980	16845
Ascaridiidae			Family				16977	16846
Ascaridoidea			Superfamily				16845	12414
Ascidae			Family				12468	12467
Asclerini			Tribe				124324	124323
Ascoidea			Superfamily				12467	12455
Ascouracaridae			Family				15849	15644
Asellidae			Family				14826	13295
Asellota			Suborder				13295	13294
Asidini			Tribe				280409	280383
Asilidae			Family				10884	10878
Asilinae			Subfamily				59646	10884
Asiopsocidae			Family				12150	16414
Asiopsocoidea			Superfamily				16414	12148
Asiracinae			Subfamily				153078	15890
Asiracini			Tribe				153079	153078
Asopinae			Subfamily				454269	12861
Aspicerinae			Subfamily				80509	11333
Aspidapiini			Tribe				245760	245611
Aspidiotini			Tribe				186103	12503
Aspidogastrea			Subclass				16239	16178
Aspidogastrida			Order				16241	16239
Aspidogastridae			Family				16242	16241
Aspistinae			Subfamily				193028	11681
Aspitatini			Tribe				445518	445503
Asplanchnidae			Family				12185	12183
Assimineidae			Family				11397	11391
Assimineinae			Subfamily				421832	11397
Astacidae			Family				14870	13303
Astacidea			Infraorder				13303	13301
Astatinae			Subfamily				197106	11301
Astegistidae			Family				15958	15666
Asteiidae			Family				10885	10878
Astenina			Subtribe				261377	261376
Asternoseiidae			Family				12444	12442
Asterolecaniidae			Family				12498	12496
Asthenini			Tribe				444453	444452
Astigmata			Order				15595	15592
Atelestidae			Family				10886	10878
Atelurinae			Subfamily				91677	14054
Atemnidae			Family				15507	15503
Atemninae			Subfamily				395129	15507
Atentoria			Infraorder				17008	11971
Athericidae			Family				10887	10878
Atherigonini			Tribe				138950	138946
Atherinidae			Family				12047	12046
Atherinidae			Family	silversides			12048	12047
Atheriniformes			Order				12046	16347
Atherinopsidae			Family				304294	12046
Athetiina			Subtribe				447313	447211
Athienemanniidae			Family				15697	15603
Athienemanniinae			Subfamily				174334	15697
Athysanini			Tribe				193923	193569
Atissini			Tribe				137559	137555
Atomariinae			Subfamily				187486	11050
Atomariini			Tribe				187503	187486
Atomosiini			Tribe				60227	60212
Atopochthoniidae			Family				15921	15649
Atopochthonioidea			Superfamily				15649	15596
Atopomelidae			Family				15859	15645
Atractidae			Family				16979	12415
Atranopsina			Subtribe				378675	378659
Atrochidae			Family				12217	12215
Atropetae			Infraorder				12130	12129
Atrophini			Tribe				335867	335866
Attacini			Tribe				443622	443596
Attelabidae			Family				11176	11170
Attelabina			Subtribe				235315	235314
Attelabinae			Subfamily				235313	11176
Attelabini			Tribe				235314	235313
Attemsiidae			Family				11531	11526
Aturidae			Family				15720	15612
Aturinae			Subfamily				174155	15720
Atyidae			Family				14867	13302
Atylenchidae			Family				15024	16925
Atypidae			Family				10628	10627
Aulacidae			Family				11337	11335
Aulacigastridae			Family				10888	10878
Aulacophorina			Subtribe				242583	242582
Auletini			Tribe				235198	235197
Aulolaimidae			Family				11759	16834
Aulolaimoididae			Family				11776	16807
Auridistomidae			Family				16284	16269
Austrachipteriidae			Family				54073	15653
Autognetidae			Family				15982	15678
Autoplusiina			Subtribe				449545	449544
Autostichidae		1947	Family				2937	1642
Autostichidae		1947	Family	Deoclonidae		1999	449620	2937
Autostichidae	Le Marchand	1947	Family	Deoclonidae	Hodges	1999	449620	2937
Autostichinae			Subfamily				434467	2937
Aventiinae			Subfamily				446774	431650
Avenzoariidae			Family				15818	15637
Avenzoariinae			Subfamily				92777	15818
Aves			Class				10699	12005
Axonolaimoidea			Superfamily				16794	11737
Axonopsinae			Subfamily				174217	15720
Axymyiidae			Family				11657	11656
Axymyioidea			Superfamily				11656	11655
Axymyiomorpha			Infraorder				11655	11630
Aylacini			Tribe				197797	11332
Azecidae			Family				11424	11422
Azeliinae			Subfamily				139205	10928
Azeliini			Tribe				139215	139205
Azotinae			Subfamily				68032	11309
Azygiidae			Family				16339	16321
Bacaniini			Tribe				119995	119964
Bacillidae			Family				15907	11925
Bactrini			Tribe				438475	438474
Baetidae			Family				11220	11218
Baetiscoidea			Superfamily				11239	11217
Baetoidea			Superfamily				11218	11217
Bagisarinae			Subfamily				449510	8769
Bagoinae			Subfamily				250142	11185
Bagoini			Tribe				250143	250142
Balaustinae			Subfamily				91907	15709
Balcanohydracarinae			Subfamily				174350	15700
Baleinae			Subfamily				422973	11439
Balitoridae			Family				12025	12018
Balitoridae			Family	Homalopteridae			12026	12025
Balitoridae			Family	hillstream and river loaches			12027	12025
Banchinae			Subfamily				335866	11277
Banchini			Tribe				336061	335866
Banksinomidae			Family				15983	15678
Baptini			Tribe				445580	445503
Barbutiidae			Family				15793	15633
Barentsiidae			Family				15423	15422
Baridina			Subtribe				251447	251446
Baridinae			Subfamily				251445	11185
Baridini			Tribe				251446	251445
Basommatophora			Suborder				11403	11402
Bastianiidae			Family				11760	16835
Bataguridae			Family				15557	15552
Bathynellacea			Order				13287	13286
Bathynellidae			Family				14810	13287
Bathyodontidae			Family				11771	16829
Bathyodontina			Suborder				16828	11770
Bathysciina			Subtribe				121247	121129
Bathysciotina			Subtribe				121471	121129
Bathytropidae			Family				217846	14847
Batrachedridae		1876	Family				2432	1642
Batrisini			Tribe				266736	266623
Bdellidae			Family				15759	15623
Bdelloidea			Subclass				12173	12172
Bdelloidea			Superfamily				15623	15599
Bdellouridae		1862	Family				14254	456250
Bdellouroidea		1862	Superfamily				456250	14253
Bedelliidae		1880	Family				1605	1346
Beesoniidae			Family				16152	12496
Behningiidae			Family				11229	11228
Belbidae			Family				54074	15659
Belbodamaeidae			Family				54075	15659
Belgrandiellini			Tribe				427210	427209
Belgrandiinae			Subfamily				427209	11497
Belgrandiini			Tribe				427538	427209
Belisariinae			Subfamily				170028	16056
Belondiridae			Family				11790	16804
Belondiroidea			Superfamily				16804	16803
Beloniformes			Order				304295	16347
Belonopterygini			Tribe				85265	85264
Belopini			Tribe				282356	282327
Belostomatidae			Family				12797	12795
Bembicinae			Subfamily				196889	11301
Bembicini			Tribe				196907	196889
Bembidiacaridae			Family				54081	15631
Bembidiina			Subtribe				384754	384450
Bembidiini			Tribe				384450	382487
Beraeidae			Family				12269	12268
Bergininae			Subfamily				124179	11068
Berginini			Tribe				124180	124179
Berothidae			Family				11830	11822
Berothinae			Subfamily				85259	11830
Berytidae			Family				12844	12842
Berytinae			Subfamily				453580	12844
Berytini			Tribe				453581	453580
Berytinini			Tribe				453589	453580
Bethylidae			Family				11326	16677
Bibionidae			Family				11660	11659
Bibionoidea			Superfamily				11659	11658
Bibionomorpha			Infraorder				11658	11630
Bidessini			Tribe				118889	118888
Biokoviellidae			Family				11532	11526
Bipaliinae			Subfamily				14256	456253
Biphyllidae			Family				11054	11037
Biphyllidae			Family	Diphyllidae			11055	11054
Bistonini			Tribe				445588	445503
Bithyniidae			Family				11392	11391
Bittacidae			Family				11365	11364
Bivalvia			Class				11480	11368
Blaberidae			Family				11911	11908
Blaberinae			Subfamily				402270	11911
Blacinae			Subfamily				338934	11276
Blackfordiidae			Family				16996	16786
Blaniulidae			Family				11586	11583
Blaniulidae			Family	Nemasomatidae			11587	11586
Blaptini			Tribe				281148	281140
Blasticotomidae			Family				11292	11290
Blastobasidae		1894	Family				2901	1642
Blattellidae			Family				11913	11908
Blattellinae			Subfamily				402100	11913
Blattidae			Family				11912	11908
Blattinae			Subfamily				402073	11912
Blattodea			Suborder				11908	11907
Blattodea			Suborder	Blattoptera			11909	11908
Bledionotinae			Subfamily				453344	12843
Bledionotini			Tribe				453345	453344
Blenniidae			Family				12079	12078
Blenniidae			Family	blennies			12080	12079
Blennioidei			Suborder				12078	12065
Blennocampinae			Subfamily				355634	11295
Blephariceridae			Family				11654	11653
Blephariceroidea			Superfamily				11653	11652
Blephariceromorpha			Infraorder				11652	11630
Blissinae			Subfamily				453414	12843
Boarmiini			Tribe				445658	445503
Bochicidae		1930	Family				394900	15493
Bochicinae			Subfamily				395141	394900
Boettgeriini			Tribe				422585	422584
Boettgerillidae			Family				11467	11465
Bogatiidae			Family				15698	15603
Bogatiinae			Subfamily				174321	15698
Bogidiellidae			Family				14816	13292
Boidae			Family				15574	15572
Bolboceratinae			Subfamily				188674	11119
Boletobiinae			Subfamily				446777	431650
Bolitophagini			Tribe				281202	281140
Bolitophilidae			Family				11666	11665
Bombinatoridae			Family				54090	15538
Bombycillidae			Family				10850	16721
Bombycilloidea			Superfamily				16721	10848
Bombycoidea		1802	Superfamily				6787	7
Bombyliidae			Family				10889	10878
Bombyliidae			Family	Mythicomyiidae			10890	10889
Bombyliinae			Subfamily				130278	10889
Bombyliini			Tribe				130279	130278
Bonnetellinae			Subfamily				92746	15818
Booidea			Superfamily				15572	15563
Borboropsidae			Family				16708	10878
Borboropsini			Tribe				60343	16708
Boreaphilina			Subtribe				264334	264333
Boreidae			Family				11366	11364
Boreochlini			Tribe				409603	409592
Boreoheptagyiini			Tribe				409153	409142
Boreohydridae			Family				16958	16782
Boridae			Family				11084	11067
Bosminidae			Family				14768	13261
Bostrichidae			Family				11022	11018
Bostrichidae			Family	Bostrychidae			11023	11022
Bostrichiformia			Infraorder				11015	11014
Bostrichinae			Subfamily				101058	11022
Bostrichini			Tribe				101068	101058
Bostrichoidea			Superfamily				11018	11015
Bostrichoidea			Superfamily	Dermestoidea			243790	11018
Bothrideridae			Family				11056	11037
Bothriocephalidae			Family				16209	16185
Bothriocrotoninae			Subfamily				393505	10622
Bothrioplanidae			Family				14243	14242
Bougainvilliidae			Family				10985	10984
Bougainvillioidea			Superfamily				10984	10983
Bourletiellidae			Family				11207	11205
Bovicoliidae			Family				11966	11965
Bovidae			Family				12646	12644
Brachinina			Subtribe				387486	387456
Brachininae			Subfamily				387455	11013
Brachinini			Tribe				387456	387455
Brachionidae			Family				12186	12183
Brachistinae			Subfamily				339986	11276
Brachodidae		1966	Family				4008	4153
Brachodinae			Subfamily				439858	4008
Brachycentridae			Family				12261	12259
Brachycera			Suborder				10878	10877
Brachyceridae			Family				11181	11170
Brachycerinae			Subfamily				186841	11181
Brachycerini			Tribe				186842	186841
Brachychaeteumatidae			Family				11533	11526
Brachychaeteumatidae			Family	Brachychaeteumidae			11534	11533
Brachychthoniidae			Family				15923	15650
Brachychthonoidea			Superfamily				15650	15596
Brachycoeliidae			Family				16285	16269
Brachycyrtinae			Subfamily				335864	11277
Brachyderini			Tribe				254233	251561
Brachyglutini			Tribe				266755	266623
Brachylaimidae			Family				16333	16320
Brachypauropodidae			Family				11628	11626
Brachypterainae			Subfamily				85984	12091
Brachystomellidae			Family				11189	11188
Brachyura			Infraorder				13304	13301
Braconidae			Family				11276	11275
Braconinae			Subfamily				339209	11276
Bradybaenidae			Family				11475	11470
Bradybaeninae			Subfamily				421924	11475
Bradynobaenidae			Family				11355	11354
Bradyporidae			Family				11886	11885
Brahmaeidae		1892	Family				6815	6787
Brahmaeidae		1892	Family	Lemoniidae		1918	449624	6815
Brahmaeidae	Swinhoe	1892	Family	Lemoniidae	Hampson	1918	449624	6815
Branchinectidae			Family				14754	13254
Branchiobdellea			Class				11254	11252
Branchiobdellida			Order				11255	11254
Branchiobdellidae			Family				11256	11255
Branchiopoda			Class				13252	13251
Branchipodidae			Family				14753	13254
Branchiura			Subclass				13265	13264
Braulidae			Family				10891	10878
Brentidae			Family				11177	11170
Brentidae			Family	Brenthidae			11178	11177
Brentinae			Subfamily				101236	11177
Brevibuccidae			Family				11711	12377
Broscina			Subtribe				385468	385467
Broscinae			Subfamily				385466	11013
Broscini			Tribe				385467	385466
Bruchina			Subtribe				243570	243569
Bruchinae			Subfamily				243562	11097
Bruchini			Tribe				243569	243562
Bruchomyiinae			Subfamily				141859	11678
Brunettiini			Tribe				141517	141238
Bryobiidae			Family				15804	15636
Bryobiinae			Subfamily				95453	15807
Bryobiini			Tribe				95454	95453
Bryocorinae			Subfamily				452378	12830
Bryocorini			Tribe				452379	452378
Bryophilinae			Subfamily				448982	8769
Bryozoa			Phylum				15424	54070
Bucculatricidae		1915	Family				1054	1033
Bucephalidae			Family				16334	16320
Bucerotimorphae			Superorder				10831	10713
Buchonomyiinae			Subfamily				409288	11645
Buddelundiellidae			Family				217847	14847
Bufonidae			Family				15545	15543
Bulaeini			Tribe				230496	230368
Bulimininae			Subfamily				425731	11437
Bulininae			Subfamily				430556	11410
Bunocotylidae			Family				16340	16321
Bunonematidae			Family				11717	16853
Bunonematoidea			Superfamily				16853	16851
Bupalini			Tribe				445912	445503
Buprestidae			Family				11145	11144
Buprestinae			Subfamily				101246	11145
Buprestini			Tribe				101585	101246
Buprestoidea			Superfamily				11144	11133
Burhinacarinae			Subfamily				92922	15834
Burhinidae			Family				10778	16760
Burhinoidea			Superfamily				16760	10770
Buthidae			Family				15446	15443
Buthoidea			Superfamily				15443	15442
Byctiscini			Tribe				235220	235197
Byrrhidae			Family				11147	11146
Byrrhinae			Subfamily				246633	11147
Byrrhoidea			Superfamily				11146	11133
Bythinini			Tribe				266846	266623
Byturidae			Family				11053	11037
Caberini			Tribe				445920	445503
Caeciliusetae			Infraorder				12148	12145
Caeciliusetae			Infraorder	Caecilietae			12149	12148
Caeciliusidae			Family				12151	16415
Caeciliusidae			Family	Caeciliidae			12152	12151
Caeciliusinae			Subfamily				169407	12151
Caeciliusini			Tribe				169408	169407
Caeciliusoidea			Superfamily				16415	12148
Caeculidae			Family				15706	15604
Caeculoidea			Superfamily				15604	15597
Caelifera			Suborder				11898	11883
Caenidae			Family				11238	11236
Caenogastropoda			Superorder				11377	11370
Caenoidea			Superfamily				11236	11217
Caenoscelini		1863	Tribe				187487	187781
Calacarini			Tribe				93834	93532
Calamoceratidae			Family				16944	12255
Calanoida			Order				13272	13271
Calathina			Subtribe				378790	378659
Caleremaeidae			Family				15954	15664
Calesinae			Subfamily				68026	11309
Caligidae			Family				14798	13278
Caligonellidae			Family				15794	15633
Caliscelidae			Family				15888	15869
Caliscelinae			Subfamily				239688	15888
Caliscelini			Tribe				239689	239688
Calisiinae			Subfamily				452876	12839
Calleidini			Tribe				378554	378043
Callidosomatinae			Subfamily				91987	15709
Callimorphina			Subtribe				447036	446956
Calliphoridae			Family				10892	10878
Callipodida			Order				11521	11520
Callipodidae			Family				11522	11521
Calliptaminae			Subfamily				402743	11904
Callistini			Tribe				380474	380371
Callomyiinae			Subfamily				64053	10945
Calobatinae			Subfamily				62767	10924
Calohypsibiidae			Family				12693	456384
Calophyidae			Family				12490	12489
Calopodinae			Subfamily				124448	11079
Calopodini			Tribe				124449	124448
Calopterygidae			Family				11834	11833
Calopterygoidea			Superfamily				11833	11832
Calosomatina			Subtribe				386396	386395
Calosotinae			Subfamily				72628	11314
Calpinae			Subfamily				446803	431650
Calpini			Tribe				446804	446803
Calyptomerinae			Subfamily				117941	11137
Calyptostomatidae			Family				15707	15605
Calyptostomatoidea			Superfamily				15605	15597
Camallanidae			Family				17007	16859
Camallanina			Suborder				16858	16857
Camallanoidea			Superfamily				16859	16858
Cambaridae			Family				14871	13303
Cambarincolidae			Family				11257	11255
Camerobiidae			Family				15795	15633
Camillidae			Family				10893	10878
Camisiidae			Family				15939	15656
Campaeini			Tribe				445925	445503
Campanulariida			Suborder				16789	16788
Campanulariidae			Family				16791	16790
Campanularioidea			Superfamily				16790	16789
Campanulinida			Suborder				16785	16784
Campanulinidae			Family				16787	16786
Campanulinoidea			Superfamily				16786	16785
Campichoetidae			Family				10894	10878
Campodeidae			Family				15585	15583
Campodeinae			Subfamily				66659	15585
Campopleginae			Subfamily				335053	11277
Campsomerini			Tribe				164819	164818
Camptorhinini			Tribe				251395	251127
Campydoridae			Family				15035	16813
Campydorina			Suborder				16812	11756
Campydoroidea			Superfamily				16813	16812
Canacidae			Family				10895	10878
Canacinae			Subfamily				130822	10895
Canacini			Tribe				130823	130822
Candonidae			Family				14804	13283
Candoninae			Subfamily				238730	14804
Canestriniidae			Family				15832	15638
Canestrinioidea			Superfamily				15638	15595
Canidae			Family				12634	12633
Caniformia			Suborder				12633	12632
Cantacaderidae			Family				217845	12825
Cantacaderinae			Subfamily				450896	12827
Cantacaderini			Tribe				450897	450896
Cantharidae			Family				11169	11157
Cantharinae			Subfamily				103618	11169
Cantharini			Tribe				103659	103618
Canthocamptidae			Family				14788	13276
Canthyloscelidae			Family				11680	11679
Canthyloscelinae			Subfamily				192856	11680
Canuellidae			Family				14789	13276
Capillariidae			Family				17002	16822
Capitata			Order				16781	10982
Capniidae			Family				12093	12090
Capniinae			Subfamily				86167	12093
Cappaeini			Tribe				454075	454050
Caprimulgi			Suborder				10809	10803
Caprimulgidae			Family				10811	10810
Caprimulgoidea			Superfamily				10810	10809
Capsalidae			Family				16220	16217
Capsalidea			Order				16217	16215
Carabidae			Family				11013	11004
Carabidae			Family	Cicindelidae			243775	11013
Carabidae			Family	Rhysodidae			243776	11013
Carabina			Subtribe				386435	386395
Carabinae			Subfamily				386394	11013
Carabini			Tribe				386395	386394
Caraboacaridae			Family				15786	15631
Carabodidae			Family				15924	15651
Carabodoidea			Superfamily				15651	15596
Caraboidea			Superfamily				11004	11003
Carabonematidae			Family				12380	12377
Caradrinina			Subtribe				447212	447211
Caradrinini			Tribe				447211	447193
Carcharodopharyngidae			Family				14261	14260
Carcinophorinae			Subfamily				347837	11932
Cardiastethini			Tribe				452552	452551
Cardinalidae			Family				16703	16717
Cardiochilinae			Subfamily				342113	11276
Cardioidea			Superfamily				16793	11488
Caridea			Infraorder				13302	13301
Carnidae			Family				10896	10878
Carnivora			Order				12632	12617
Carphaniidae			Family				12685	12682
Carpocorini			Tribe				454078	454050
Carpoglyphidae			Family				15842	15641
Carpomyina			Subtribe				405707	405706
Carpomyini			Tribe				405706	405699
Carpophilinae			Subfamily				377787	11042
Carposinidae		1897	Family				5561	431644
Carposinoidea		1897	Superfamily				431644	7
Carychiidae			Family				54117	11417
Caryedonina			Subtribe				243728	243727
Caryophyllaeidae			Family				16190	16184
Caryophyllidea			Order				16184	16181
Cassidinae			Subfamily				243382	11097
Cassidini			Tribe				243383	243382
Cassymini			Tribe				445945	445503
Castniidae		1828	Family				16712	4153
Castniinae			Subfamily				439950	16712
Castoridae			Family				12651	12649
Catacanderidae			Family				12826	12825
Cataclysmini			Tribe				444473	444452
Catantopinae			Subfamily				402657	11904
Catapiina			Subtribe				246364	246163
Catenotaeniidae			Family				16195	16188
Catenulida			Order				14230	14226
Catenulidae			Family				14231	14230
Cathaemasiidae			Family				54106	16246
Catinellinae			Subfamily				431015	11421
Catocalini			Tribe				446649	446517
Catopina			Subtribe				123057	122874
Caudiferidae			Family				15833	15639
Cebrioninae			Subfamily				236355	11164
Cebrionini			Tribe				236356	236355
Cecidocharini			Tribe				405414	405413
Cecidomyiidae			Family				11667	11665
Cecidomyiinae			Subfamily				302481	11667
Cecidophyinae			Subfamily				94573	15778
Cecidophyini			Tribe				94574	94573
Ceinae			Subfamily				401951	11320
Celaenopsidae			Family				12449	12448
Celaenopsoidea			Superfamily				12448	12445
Cellularia			Subphylum				15403	15402
Cemiostominae			Subfamily				434210	1609
Cenchreini			Tribe				152048	152047
Cenocoeliinae			Subfamily				341097	11276
Centrarchidae			Family				12068	12066
Centrarchidae			Family	sunfishes and freshwater basses			12069	12068
Centropagidae			Family				14780	13272
Centrorhynchidae			Family				15487	15486
Centrotinae			Subfamily				239580	15882
Cephalaspidomorphi			Class				12000	11998
Cephalaspidomorphi			Class	lampreys			12001	12000
Cephalciinae			Subfamily				354244	11286
Cephaliini			Tribe				406011	405847
Cephalobaenida			Order				13268	13267
Cephalobidae			Family				11723	16854
Cephaloboidea			Superfamily				16854	16851
Cephalochlamydidae			Family				54101	16185
Cephalocteinae			Subfamily				453873	12853
Cephalocteini			Tribe				453874	453873
Cephalogonimidae			Family				16288	16269
Cephalopsini			Tribe				140938	140937
Cephalotyphlini			Tribe				262496	262495
Cepheidae			Family				15927	15652
Cephenniini			Tribe				258486	258485
Cepheoidea			Superfamily				15652	15596
Cephidae			Family				11280	11279
Cephoidea			Superfamily				11279	11278
Ceractinomorpha			Subclass				15405	15404
Cerambycidae			Family				11094	11093
Cerambycinae			Subfamily				114456	11094
Ceraphronidae			Family				11305	11304
Ceraphronoidea			Superfamily				11304	11274
Cerastipsocini			Tribe				169583	169582
Ceratanisini			Tribe				280696	280383
Ceratapiini			Tribe				245792	245611
Ceratitidini			Tribe				405769	405768
Ceratocombidae			Family				12792	12791
Ceratocombinae			Subfamily				450302	12792
Ceratocombini			Tribe				450303	450302
Ceratophyllidae			Family				12228	12227
Ceratophyllinae			Subfamily				170546	12228
Ceratophylloidea			Superfamily				12227	12219
Ceratopogonidae			Family				11644	11643
Ceratopogoninae			Subfamily				130834	11644
Ceratopogonini			Tribe				131115	130834
Ceratozetidae			Family				15928	15653
Ceratozetoidea			Superfamily				15653	15596
Cercerini			Tribe				196214	196213
Cercomegistidae			Family				12443	12442
Cercomegistina			Suborder				12442	12417
Cercopagidae			Family				16733	13262
Cercopidae			Family				15874	15870
Cercopithecidae			Family				12631	12630
Cercopoidea			Superfamily				15870	15867
Cerithoidea			Superfamily				11386	11385
Cerocephalinae			Subfamily				401928	11320
Cerococcidae			Family				12499	12496
Cerocomini			Tribe				123754	123685
Ceropalinae			Subfamily				198855	11358
Cerophytidae			Family				11159	11157
Certhiidae			Family				10859	16722
Certhioidea			Superfamily				16722	10848
Cervidae			Family				12647	12644
Cerylidae			Family				10821	10820
Ceryloidea			Superfamily				10820	10819
Cerylonidae			Family				11057	11037
Cerylonidae			Family	Cerylidae			11058	11057
Ceryloninae			Subfamily				115165	11057
Cestoda			Class				16176	16175
Cetoniidae			Family				11132	11115
Cetoniina			Subtribe				247007	246991
Cetoniinae			Subfamily				246990	11132
Cetoniini			Tribe				246991	246990
Ceuthomadarinae			Subfamily				434530	2413
Ceutorhynchinae			Subfamily				255702	11185
Chabertiidae			Family				16906	16895
Chactoidea			Superfamily				15444	15442
Chaetodactylidae			Family				15843	15641
Chaetomalachinae			Subfamily				449886	16936
Chaetonotida			Order				11245	11244
Chaetonotidae			Family				11249	11246
Chaetonotinae			Subfamily				412804	11249
Chaetonotoidea			Class				11244	11241
Chalarinae			Subfamily				141146	10944
Chalcididae			Family				11310	11307
Chalcidinae			Subfamily				68254	11310
Chalcidoidea			Superfamily				11307	11274
Chalcophorini			Tribe				101684	101246
Chalcosiinae			Subfamily				440211	3925
Chamaeleonidae			Family				15568	15561
Chamaemyiidae			Family				10897	10878
Chamaemyiidae			Family	Cremifanniidae			10898	10897
Chamaemyiinae			Subfamily				60434	10897
Chamaemyiini			Tribe				60435	60434
Chamaesomatidae			Family				11535	11526
Chamaesomatidae			Family	Chamaesomidae			11536	11535
Chambersiellidae			Family				11713	12377
Chamobatidae			Family				15929	15653
Chaoboridae			Family				11649	11648
Chappuisiidae			Family				14790	13276
Chapuisididae			Family				15699	15603
Chapuisidinae			Subfamily				174324	15699
Charadracarinae			Subfamily				92069	15739
Charadrii			Suborder				10770	10769
Charadriidae			Family				10775	10774
Charadriiformes			Order				10769	10714
Charadrioidea			Superfamily				10774	10770
Charaxinae			Subfamily				441653	7202
Charaxini			Tribe				441654	441653
Charinidae			Family				10625	10624
Charipinae			Subfamily				80311	11333
Charipini			Tribe				80497	80311
Charmontinae			Subfamily				342109	11276
Charopidae			Family				54118	11449
Charopinae			Subfamily				421991	54118
Chasmatopterinae			Subfamily				257318	11130
Cheiridiidae			Family				15499	16684
Cheiridiinae			Subfamily				395144	15499
Cheiridioidea			Superfamily				16684	15492
Chelariini			Tribe				437837	436897
Chelicerata			Subphylum				10614	2
Cheliferidae			Family				15505	15503
Cheliferinae			Subfamily				395151	15505
Cheliferini			Tribe				395152	395151
Cheliferoidea			Superfamily				15503	15492
Chelodesmidae			Family				11567	11566
Chelonii			Order				15549	15455
Cheloniidae			Family				15555	15553
Cheloninae			Subfamily				341675	11276
Chelonioidea			Superfamily				15553	15550
Chernetidae			Family				15506	15503
Chernetinae			Subfamily				395264	15506
Chernetini			Tribe				395265	395264
Chesiadini			Tribe				444483	444452
Chetostomatina			Subtribe				405725	405724
Chevrolatiini			Tribe				258663	258485
Cheylabididae			Family				15850	15644
Cheyletidae			Family				15769	15627
Cheyletoidea			Superfamily				15627	15600
Chilocorinae		1846	Subfamily				230160	11062
Chilocorini		1846	Tribe				230164	230160
Chilognatha			Subclass				11504	11498
Chilopoda			Class				11598	15590
Chiloxanthinae			Subfamily				450650	12821
Chimabachidae		1870	Family				2235	1642
Chirocephalidae			Family				14755	13254
Chirodiscidae			Family				15860	15645
Chironomidae			Family				11645	11643
Chironominae			Subfamily				406837	11645
Chironomini			Tribe				406844	406837
Chironomoidea			Superfamily				11643	11642
Chiroptera			Order				12623	12617
Chiropteromyzidae			Family				16707	10878
Chiropteromyzini			Tribe				60591	16707
Chitrellinae			Subfamily				396095	15495
Chlaeniina			Subtribe				380373	380372
Chlaeniinae			Subfamily				380371	11013
Chlaeniini			Tribe				380372	380371
Chlidanotinae			Subfamily				439276	4189
Chloephorinae			Subfamily				447137	431659
Chloephorini			Tribe				447138	447137
Chloroperlidae			Family				12097	12095
Chloroperlinae			Subfamily				85948	12097
Chloropidae			Family				10899	10878
Choanolaimidae			Family				11753	16796
Choerocampina			Subtribe				443704	443658
Choerorhinini			Tribe				247798	247743
Cholevina			Subtribe				122875	122874
Cholevinae			Subfamily				121128	11109
Cholevini			Tribe				122874	121128
Chondrinidae			Family				11434	11425
Chondrosteginae			Subfamily				443577	6728
Chondrostegini			Tribe				443578	443577
Chondrostei			Subclass				12009	12006
Chondrulini			Tribe				425368	425367
Chonostropheina			Subtribe				235226	235225
Choraginae			Subfamily				186689	11173
Chordata			Phylum				11996	54070
Chordeumatida			Order				11526	11520
Chordeumatidae			Family				11537	11526
Chordeumatidae			Family	Chordeumidae			11538	11537
Chordodea			Order				15408	11803
Chordodidae			Family				15409	15408
Chordodinae			Subfamily				409687	15409
Choreutidae		1858	Family				5268	5267
Choreutinae			Subfamily				438446	5268
Choreutoidea		1858	Superfamily				5267	7
Chortoglyphidae			Family				15836	15640
Chromadorida			Order				11744	11729
Chromadorida			Order	Desmodorida			11745	11744
Chromadoridae			Family				11746	16796
Chromadorina			Suborder				16795	11744
Chromadoroidea			Superfamily				16796	16795
Chromogeotrupini			Tribe				188648	188472
Chronogastridae			Family				54094	16836
Chrysididae			Family				11327	16677
Chrysidinae			Subfamily				78479	11327
Chrysidini			Tribe				78752	78479
Chrysidoidea			Superfamily				16677	11274
Chrysobothrinae			Subfamily				102993	11145
Chrysobothrini			Tribe				102994	102993
Chrysolampinae			Subfamily				74422	11319
Chrysomelidae			Family				11097	11093
Chrysomelidae			Family	Bruchidae			243772	11097
Chrysomelidae			Family	Megalopodidae			243773	11097
Chrysomelidae			Family	Orsodacnidae			243774	11097
Chrysomelinae			Subfamily				241536	11097
Chrysomeloidea			Superfamily				11093	11025
Chrysopeleiinae			Subfamily				436623	3091
Chrysopidae			Family				11823	11822
Chrysopinae			Subfamily				85264	11823
Chrysopini			Tribe				85269	85264
Chthoniidae			Family				12109	12108
Chthoniinae			Subfamily				395283	12109
Chthoniini			Tribe				395284	395283
Chthonioidea			Superfamily				12108	12107
Chyromyidae			Family				10900	10878
Chyromyidae			Family	Nannodastiidae			10901	10900
Chyzeriidae			Family				15708	15606
Chyzeroidea			Superfamily				15606	15597
Cicadellidae			Family				15880	15872
Cicadellinae			Subfamily				195481	15880
Cicadellini			Tribe				195486	195481
Cicadettini			Tribe				239489	239488
Cicadidae			Family				15877	15871
Cicadinae			Subfamily				239451	15877
Cicadini			Tribe				239452	239451
Cicadoidea			Superfamily				15871	15867
Cicadomorpha			Suborder				15867	12353
Cichlidae			Family				12076	12075
Cichlidae			Family	cichlids			12077	12076
Cicindelina			Subtribe				387291	387290
Cicindelinae			Subfamily				387283	11013
Cicindelini			Tribe				387290	387283
Ciconii			Suborder				10739	10738
Ciconiidae			Family				10743	10740
Ciconiiformes			Order				10738	10714
Ciconiimorphae			Superorder				10714	10713
Ciconioidea			Superfamily				10740	10739
Cidariini			Tribe				444571	444452
Ciidae			Family				11069	11067
Ciidae			Family	Cioidae			243798	11069
Ciidae			Family	Cisidae			11070	11069
Ciliellinae			Subfamily				429249	11478
Cillaeinae			Subfamily				377958	11042
Cimberidinae			Subfamily				258282	11171
Cimberidini			Tribe				258283	258282
Cimbicidae			Family				11293	11290
Cimbicinae			Subfamily				354049	11293
Cimeliidae		1916	Family				305790	7483
Cimeliidae		1916	Family	Axiidae		1919	449616	305790
Cimeliidae	Chrétien	1916	Family	Axiidae	Rebel	1919	449616	305790
Cimicidae			Family				12834	12831
Cimicinae			Subfamily				452691	12834
Cimicoidea			Superfamily				12831	12824
Cimicomorpha			Infraorder				12824	12786
Cinclidae			Family				10851	16723
Cincloidea			Superfamily				16723	10848
Cionini			Tribe				250402	250212
Cirolanidae			Family				14831	13297
Cisticolidae			Family				10866	16724
Cisticoloidea			Superfamily				16724	10848
Cithaeronidae			Family				16927	10636
Citharidae			Family				12085	12084
Cixiidae			Family				15889	15869
Cixiinae			Subfamily				152217	15889
Cixiini			Tribe				152218	152217
Cladocera			Suborder				13259	13257
Cladonematidae			Family				16953	16951
Cladonychiidae			Family				243843	16027
Cladonychiidae			Family	Erebomastridae			243844	243843
Cladorchiidae			Family				16257	16248
Cladurini			Tribe				145837	145836
Clambidae			Family				11137	11134
Clambinae			Subfamily				117907	11137
Clausiliidae			Family				11439	11438
Clausiliinae			Subfamily				422663	11439
Clausiliini			Tribe				422664	422663
Clausilioidea			Superfamily				11438	11419
Clavidae			Family				10987	10986
Clavigerini			Tribe				267248	266623
Clavoidea			Superfamily				10986	10983
Cleonini			Tribe				248516	248053
Cleonyminae			Subfamily				401882	11320
Cleptinae			Subfamily				79228	11327
Cleridae			Family				11033	11029
Cleridae			Family	Cyrynetidae			243793	11033
Cleridae			Family	Korynetidae			243792	11033
Clerinae			Subfamily				187140	11033
Cleroidea			Superfamily				11029	11025
Cletodidae			Family				14791	13276
Clinidiina			Subtribe				385500	385499
Clinostomidae			Family				16323	16317
Clinostomoidea			Infraorder				16317	16245
Clinotanypodini			Tribe				409292	409291
Clivinematini			Tribe				452335	452334
Clivinina			Subtribe				385551	385550
Clivinini			Tribe				385550	385517
Cloacaridae			Family				15770	15627
Clubionidae			Family				10681	10636
Clupeidae			Family				12019	12018
Clupeidae			Family	herrings, shads, sardines and al			12020	12019
Clupeiformes			Order				12018	16347
Clusiidae			Family				10902	10878
Clusiinae			Subfamily				61131	10902
Clusiodinae			Subfamily				61148	10902
Clypeodromini			Tribe				331377	331376
Clytiinae			Subfamily				240606	16791
Clytrini			Tribe				240973	241164
Cnemeplatiini			Tribe				280704	280383
Cnemospathididae			Family				454404	10878
Cneorhinini			Tribe				254881	251561
Cnephasiini			Tribe				439580	439288
Cnidaria			Phylum				10979	54070
Cobitidae			Family				12023	12018
Cobitidae			Family	loaches			12024	12023
Coccidae			Family				12500	12496
Coccidulinae		1846	Subfamily				230501	11062
Coccidulini		1846	Tribe				230521	230501
Coccinellidae			Family				11062	11037
Coccinellinae		1807	Subfamily				230368	11062
Coccinellini		1807	Tribe				230369	230368
Coccoidea			Superfamily				12496	12354
Coccophaginae			Subfamily				67611	11309
Coccyzidae			Family				10801	10800
Coccyzoidea			Superfamily				10800	10797
Cochlicellidae			Family				54120	11470
Cochlicopidae			Family				11423	11422
Cochlicopoidea			Superfamily				11422	11419
Cochliopinae			Subfamily				427175	11497
Cochlodinini			Tribe				423411	423153
Cochlostomatidae			Family				11381	11379
Cochylini			Tribe				439289	439288
Coelogynoporidae			Family				14244	14242
Coelometopinae			Subfamily				282138	11077
Coelometopini			Tribe				282139	282138
Coelopidae			Family				10903	10878
Coelopinae			Subfamily				61170	10903
Coelopini			Tribe				61171	61170
Coenagrionidae			Family				11838	11837
Coenagrionoidea			Superfamily				11837	11832
Coenomyiidae			Family				16685	10878
Coenonymphini			Tribe				441250	441220
Coenosiinae			Subfamily				138630	10928
Coenosiini			Tribe				138781	138630
Coleophoridae		1850	Family				2440	1642
Coleoptera			Order				10993	4
Coletiinae			Subfamily				91657	14054
Coliadinae			Subfamily				440803	6969
Coliadini			Tribe				440804	440803
Collartidini			Tribe				452826	452825
Collembola			Order				11187	11186
Collohmanniidae			Family				15934	15654
Collohmannioidea			Superfamily				15654	15596
Collothecacea			Order				12215	12206
Collothecacea			Order	Paedotrocha			12216	12215
Collothecidae			Family				54116	12215
Collyriclidae			Family				16308	16270
Collyriinae			Subfamily				335047	11277
Colobognatha			Superorder				11511	11504
Colomerini			Tribe				94630	94573
Coloninae			Subfamily				120631	11109
Colotoini			Tribe				445956	445503
Colotrechninae			Subfamily				401877	11320
Colubridae			Family				15575	15573
Colubroidea			Superfamily				15573	15563
Columbi			Suborder				10792	10791
Columbidae			Family				10794	10793
Columbiformes			Order				10791	10790
Columbimorphae			Superorder				10790	10713
Columboidea			Superfamily				10793	10792
Colydiinae			Subfamily				127007	16939
Colymbetinae			Subfamily				119234	11011
Colymbetini			Tribe				119235	119234
Comibaenini			Tribe				445390	445389
Comostolini			Tribe				445411	445389
Conaliini			Tribe				191213	11074
Condicinae			Subfamily				449097	8769
Condicini			Tribe				449098	449097
Conica			Order				16784	16783
Coniopterygidae			Family				11826	11822
Coniopteryginae			Subfamily				85411	11826
Coniopterygini			Tribe				85412	85411
Conocephalidae			Family				11887	11885
Conochilidae			Family				12218	12207
Conoderinae			Subfamily				256898	11185
Conophorini			Tribe				130379	130278
Conopidae			Family				10904	10878
Continenticola		1998	Suborder				456251	14248
Convolutidae			Family				14228	14227
Conwentziini			Tribe				85374	85363
Copelatinae			Subfamily				119229	11011
Copelatini			Tribe				119230	119229
Copepoda			Subclass				13270	13264
Copidognathinae			Subfamily				174525	15765
Coprini			Tribe				192133	191928
Copromorphoidea		1928	Superfamily				5560	7
Copromyzinae			Subfamily				64757	10958
Coprophilini			Tribe				263039	263038
Coptopsyllidae			Family				16051	12224
Coracii			Suborder				10828	10818
Coraciidae			Family				10830	10829
Coraciiformes			Order				10818	10817
Coraciimorphae			Superorder				10817	10713
Coracioidea			Superfamily				10829	10828
Coraebini			Tribe				102405	102140
Corbiculidae			Family				11492	11491
Corbiculoidea			Superfamily				11491	11488
Cordulegastridae			Family				11846	11845
Cordulegastroidea			Superfamily				11845	11840
Corduliidae			Family				11848	11847
Cordylophorinae			Subfamily				240491	10987
Coreidae			Family				12850	12846
Coreinae			Subfamily				453700	12850
Coreini			Tribe				453705	453700
Coreoidea			Superfamily				12846	12837
Corimaliini			Tribe				258078	11180
Corinnidae			Family				10682	10636
Corinnidae			Family	Myrmeciidae			10683	10682
Corinnidae			Family	Myrmeciuminae			10684	10682
Corioxenidae			Family				12668	12667
Corioxeninae			Subfamily				170811	12668
Corixidae			Family				12801	12800
Corixinae			Subfamily				450340	12801
Corixini			Tribe				450345	450340
Corixoidea			Superfamily				12800	12794
Corophiidae			Family				240490	13292
Corsyrini			Tribe				378577	378576
Corticariinae			Subfamily				397711	11065
Cortylina			Subtribe				248992	248991
Cortylini			Tribe				248991	248990
Corvi			Suborder				10843	10842
Corvidae			Family				10847	10844
Corvoidea			Superfamily				10844	10843
Corylophidae			Family				11063	11037
Corylophidae			Family	Orthoperidae			11064	11063
Corylophinae			Subfamily				187387	11063
Corylophini			Tribe				187461	187387
Corymorphidae			Family				16956	16782
Corynidae			Family				16952	16951
Coryninae			Subfamily				354025	11293
Corynoidea			Superfamily				16951	16781
Coryphacini			Tribe				169410	169407
Coryphiina			Subtribe				264371	264333
Coryphiini			Tribe				264333	263922
Coryssomerini			Tribe				256899	256898
Cosmiina			Subtribe				447815	447660
Cosmocercidae			Family				12416	12415
Cosmoceroidea			Superfamily				12415	12414
Cosmochthoniidae			Family				15935	15655
Cosmochthonioidea			Superfamily				15655	15596
Cosmopterigidae		1876	Family				3091	1642
Cosmopteriginae			Subfamily				436663	3091
Cossidae		1815	Family				4154	4153
Cossinae			Subfamily				439901	4154
Cossoidea		1815	Superfamily				4153	7
Cossoidea		1815	Superfamily	Sesioidea			449617	4153
Cossoninae			Subfamily				247743	11185
Cossonini			Tribe				247744	247743
Cossyphini			Tribe				282373	282327
Cossyphodini			Tribe				282384	282327
Cosymbiini			Tribe				443955	443954
Cottidae			Family				12063	12062
Cottidae			Family	sculpins			12064	12063
Cottoidei			Suborder				12062	12061
Crabronidae			Family				11301	11298
Crabroninae			Subfamily				196460	11301
Crabronini			Tribe				196461	196460
Crambidae		1810	Family				16942	5569
Crambinae			Subfamily				443083	16942
Crangonyctidae			Family				14817	13292
Crangonyctidae			Family	Crangonidae			305749	14817
Craspedopomatinae			Subfamily				425300	11380
Craspedosomatidae			Family				11539	11526
Craspedosomatidae			Family	Craspedosomidae			11540	11539
Cratominae			Subfamily				401871	11320
Cremastinae			Subfamily				334948	11277
Cremifaniinae			Subfamily				60587	10897
Crenosomatidae			Family				16900	16894
Cribrochiurini			Tribe				57793	57402
Criconematidae			Family				11694	16918
Criconematina			Suborder				16917	11684
Criconematoidea			Superfamily				16918	16917
Crinopteryginae			Subfamily				432380	424
Criocerinae			Subfamily				243521	11097
Criodrilidae			Family				12329	12327
Criodriloidea			Superfamily				12327	11870
Cristatellidae			Family				15429	15425
Crocinae			Subfamily				85667	11819
Crossotocerini			Tribe				434742	434617
Crotonioidea			Superfamily				15656	15596
Crowsoniellidae			Family				10996	10995
Crustacea			Subphylum				13251	2
Cryphalini			Tribe				249060	248990
Cryptarchinae			Subfamily				377827	11042
Cryptazecinae			Subfamily				425865	11441
Crypticini			Tribe				281995	281994
Cryptinae			Subfamily				333613	11277
Cryptini			Tribe				333614	333613
Cryptobiina			Subtribe				261532	261376
Cryptoblabini			Tribe				441767	441766
Cryptocephalinae			Subfamily				241164	11097
Cryptocephalini			Tribe				241165	241164
Cryptochetidae			Family				10905	10878
Cryptodira			Suborder				15550	15549
Cryptoflatina			Subtribe				152093	152092
Cryptognathidae			Family				15796	15633
Cryptogonimidae			Family				16277	16268
Cryptolechiini			Tribe				435249	434990
Cryptonchoidea			Superfamily				16829	16828
Cryptophagidae			Family				11050	11037
Cryptophaginae		1826	Subfamily				187781	11050
Cryptophagini		1837	Tribe				187782	187781
Cryptophilinae			Subfamily				189864	11051
Cryptopidae			Family				11607	11606
Cryptopidae			Family	Cryptopsidae			11608	11607
Cryptorhynchina			Subtribe				251392	251128
Cryptorhynchinae			Subfamily				251127	11185
Cryptorhynchini			Tribe				251128	251127
Cryptotympanini			Tribe				239444	239443
Crypturgini			Tribe				249262	248990
Ctenacaridae			Family				15943	15657
Ctenacaroidea			Superfamily				15657	15596
Ctenidae			Family				348069	348068
Ctenistini			Tribe				267280	266623
Ctenizidae			Family				10631	10627
Ctenobelbidae			Family				15911	15646
Ctenocalini			Tribe				331380	331376
Ctenolepismatinae			Subfamily				91558	14053
Ctenopelmatinae			Subfamily				332799	11277
Ctenopelmatini			Tribe				332800	332799
Ctenophthalmidae			Family				12226	12224
Ctenophthalminae			Subfamily				170235	12226
Ctenophthalmini			Tribe				170236	170235
Ctenopoda			Infraorder				13260	13259
Ctenostomata			Order				15431	15430
Cucujidae			Family				11047	11037
Cucujiformia			Infraorder				11025	11014
Cucujoidea			Superfamily				11037	11025
Cucujoidea			Superfamily	Clavicornia			243794	11037
Cuculi			Suborder				10797	10796
Cuculidae			Family				10799	10798
Cuculiformes			Order				10796	10795
Cuculimorphae			Superorder				10795	10713
Cucullanidae			Family				16974	16847
Cuculliinae			Subfamily				449288	8769
Cuculoidea			Superfamily				10798	10797
Culicidae			Family				11650	11648
Culicinae			Subfamily				134910	11650
Culicini			Tribe				134979	134910
Culicoidea			Superfamily				11648	11642
Culicoidini			Tribe				130835	130834
Culicomorpha			Infraorder				11642	11630
Culisetini			Tribe				135000	134910
Cunaxidae			Family				15760	15623
Cupedoidea			Superfamily				10995	10994
Curculionidae			Family				11185	11170
Curculionidae			Family	Platypodidae			243771	11185
Curculionidae			Family	Scolytidae			243770	11185
Curculioninae			Subfamily				250212	11185
Curculionini			Tribe				250603	250212
Curculionoidea			Superfamily				11170	11025
Curtonotidae			Family				10906	10878
Cushmanideidae			Family				16741	13282
Cyaneidae			Family				16972	16970
Cyathocotylidae			Family				16327	16319
Cyatholaimidae			Family				11748	16796
Cybaeidae			Family				10673	10636
Cybalomiinae			Subfamily				443056	16942
Cybistrini			Tribe				119193	119178
Cybocephalidae			Family				11043	11037
Cychrini			Tribe				387230	386394
Cyclocoelidae			Family				16324	16318
Cyclocoeloidea			Infraorder				16318	16245
Cyclocypridinae			Subfamily				238918	14804
Cyclominae			Subfamily				256681	11185
Cyclophoridae			Family				11380	11379
Cyclophorinae			Subfamily				425295	11380
Cyclophoroidea			Superfamily				11379	11378
Cyclophyllidea			Order				16188	16181
Cyclopidae			Family				14783	13274
Cyclopinae			Subfamily				237439	14783
Cyclopinidae			Family				14784	13274
Cyclopoida			Order				13274	13273
Cyclosominae			Subfamily				378576	11013
Cyclosomini			Tribe				378605	378576
Cycloterina			Subtribe				257208	257207
Cycloterini			Tribe				257207	257018
Cydnidae			Family				12853	12851
Cydninae			Subfamily				453838	12853
Cydnini			Tribe				453839	453838
Cylapinae			Subfamily				452454	12830
Cylindrocorporidae			Family				217844	217843
Cylindrocorporidea			Superfamily				217843	16851
Cylindromorphini			Tribe				102502	102140
Cylindrotomidae			Family				11633	11632
Cylindrotominae			Subfamily				145494	11633
Cylisticidae			Family				14851	14847
Cylloceriinae			Subfamily				332782	11277
Cymatiainae			Subfamily				450431	12801
Cymbaeremaeidae			Family				15946	15658
Cymbaeremoidea			Superfamily				15658	15596
Cymbionotini			Tribe				385493	385492
Cyminae			Subfamily				453428	12843
Cymindidina			Subtribe				378070	378069
Cymindidini			Tribe				378069	378043
Cymini			Tribe				453429	453428
Cynegetini		1866	Tribe				455538	230131
Cynipidae			Family				11332	11331
Cynipini			Tribe				197316	11332
Cynipoidea			Superfamily				11331	11274
Cyphicerini			Tribe				254786	251561
Cyphoderidae			Family				11199	11196
Cyphophthalmi			Suborder				16022	15591
Cyprettinae			Subfamily				239197	14805
Cypricercinae			Subfamily				239017	14805
Cyprididae			Family				14805	13283
Cypridinae			Subfamily				239190	14805
Cypridocopina			Suborder				13283	13281
Cypridopsinae			Subfamily				239077	14805
Cyprinidae			Family				12021	12018
Cyprinidae			Family	minnows and carps			12022	12021
Cyprinodontidae			Family				12054	12049
Cyprinodontidae			Family	killifishes			12055	12054
Cyprinodontiformes			Order				12049	16347
Cyprinotinae			Subfamily				239165	14805
Cyproidinae			Subfamily				239340	14807
Cyrtacanthacridinae			Subfamily				402650	11904
Cyrtaucheniidae			Family				10630	10627
Cyrtopogonini			Tribe				59974	59973
Cyrtoscydmini			Tribe				258670	258485
Cystidicolidae			Family				16879	16867
Cystoopsidae			Family				17003	16822
Cythercopina			Suborder				13282	13281
Cythereinae			Subfamily				130245	10889
Cytherideidae			Family				14801	13282
Cytheruridae			Family				16742	13282
Cyzicidae			Family				14761	13258
Dacelonidae			Family				10822	16778
Dacelonoidea			Superfamily				16778	10819
Dacinae			Subfamily				405768	10966
Dacini			Tribe				405774	405768
Dacninae			Subfamily				188337	11052
Dactylocheliferini			Tribe				395167	395151
Dactylogyridae			Family				16222	16224
Dactylogyridea			Order				16218	16215
Dactylogyrinea			Suborder				16224	16218
Dactylopiidae			Family				12502	12496
Daesiidae			Family				15508	15450
Dagini			Tribe				137741	137712
Dahlicini			Tribe				432756	432746
Dalyatini			Tribe				385845	385844
Dalyelliida			Suborder				14272	14259
Dalyelliidae			Family				14273	14272
Damaeidae			Family				15948	15659
Damaeoidea			Superfamily				15659	15596
Damaeolidae			Family				15912	15646
Dampfiellidae			Family				54077	15678
Danaceinae			Subfamily				449934	16936
Danainae			Subfamily				441569	7202
Daniconematidae			Family				16991	16860
Daphniidae			Family				14770	13261
Darcythompsoniidae			Family				16736	13276
Darwinulidae			Family				14809	14808
Darwinulocopina			Suborder				14808	13281
Dascillidae			Family				11142	11141
Dascillinae			Subfamily				188131	11142
Dascilloidea			Superfamily				11141	11133
Dasiopinae			Subfamily				62711	10921
Dasycerinae			Subfamily				267973	11113
Dasydytidae			Family				11251	11246
Dasyheleinae			Subfamily				131622	11644
Dasypogoninae			Subfamily				60154	10884
Dasypogonini			Tribe				60155	60154
Dasypsocini			Tribe				169447	169446
Dasytidae			Family				16936	11029
Dasytinae			Subfamily				449632	16936
Daudebardiinae			Subfamily				430320	11458
Davaineidae			Family				16196	16188
Decapoda			Order				13300	13299
Deleasterini			Tribe				263062	263038
Delimini			Tribe				423552	423153
Delomeristini			Tribe				330035	330034
Delphacidae			Family				15890	15869
Delphacinae			Subfamily				152454	15890
Delphacini			Tribe				152470	152454
Deltocephalinae			Subfamily				193569	15880
Deltocephalini			Tribe				193768	193569
Demetriadini			Tribe				378484	378043
Demodicidae			Family				15771	15627
Demospongiae			Class				15404	15403
Dendarini			Tribe				281211	281140
Dendrocoelidae		1892	Family				14250	456254
Dendrocygnidae			Family				10711	16757
Dendrocygnoidea			Superfamily				16757	10709
Dendroleontini			Tribe				85564	85557
Dendrophilinae			Subfamily				119964	11102
Dendrophilini			Tribe				119965	119964
Deocloninae			Subfamily				434255	2937
Deporaina			Subtribe				235232	235225
Deporaini			Tribe				235225	235197
Depressariinae			Subfamily				434990	1832
Depressariini			Tribe				434991	434990
Deraeocorinae			Subfamily				452334	12830
Deraeocorini			Tribe				452342	452334
Derbidae			Family				15891	15869
Derbinae			Subfamily				152047	15891
Derelomini			Tribe				251110	250212
Dericorythinae			Subfamily				402645	11904
Dermanyssidae			Family				12478	12474
Dermanyssina			Suborder				12455	12417
Dermanyssoidea			Superfamily				12474	12455
Dermaptera			Order				11929	4
Dermationidae			Family				15819	15637
Dermestidae			Family				11020	11018
Dermochelyidae			Family				15556	15554
Dermochelyoidea			Superfamily				15554	15550
Dermoglyphidae			Family				15820	15637
Derodontidae			Family				11017	11016
Derodontoidea			Superfamily				11016	11015
Derogenidae			Family				16341	16321
Desmidocercidae			Family				16874	16863
Desmobathrinae			Subfamily				446333	7520
Desmodorida			Order				16797	11729
Desmodoridae			Family				11749	16799
Desmodorina			Suborder				16798	16797
Desmodoroidea			Superfamily				16799	16798
Desmoscolecida			Order				11735	11729
Desmoscolecidae			Family				11736	16802
Desmoscolecina			Suborder				16801	11735
Desmoscolecoidea			Superfamily				16802	16801
Deuterogoniinae			Subfamily				434831	2244
Dexiinae			Subfamily				144287	10964
Diabroticina			Subtribe				242588	242582
Diacritinae			Subfamily				332778	11277
Diadocidiidae			Family				11668	11665
Diamesinae			Subfamily				409142	11645
Diamesini			Tribe				409166	409142
Diaperinae			Subfamily				281994	11077
Diaperini			Tribe				282058	281994
Diaphanocephalidae			Family				16898	16893
Diaphanocephaloidea			Superfamily				16893	12408
Diapriidae			Family				11345	11344
Diaptomidae			Family				14781	13272
Diaptominae			Subfamily				237314	14781
Diaspididae			Family				12503	12496
Diaspidini			Tribe				185988	12503
Diastatidae			Family				10907	10878
Dicaelini			Tribe				380265	380264
Dicercini			Tribe				101721	101246
Dichaetomyiini			Tribe				138961	138946
Dichaeturidae			Family				11247	11246
Dichelesthiidae			Family				14799	13278
Dichomeridinae			Subfamily				436838	3177
Dichotrachelini			Tribe				256682	256681
Diclybothriidae			Family				16231	16229
Diclybothriidea			Order				16229	16227
Dicranolasmatidae			Family				16041	16034
Dicranophoridae			Family				12187	12183
Dicranurini			Tribe				446454	446384
Dicrocoeliidae			Family				16289	16269
Dictynidae			Family				10675	10636
Dictyocaulidae			Family				16910	16896
Dictyopharidae			Family				15892	15869
Dictyopharinae			Subfamily				239653	15892
Dictyoptera			Order				11907	4
Dicyphini			Tribe				452387	452378
Dicyrtomidae			Family				11208	11205
Digamasellidae			Family				12459	12456
Digenea			Subclass				16240	16178
Dignathodontidae			Family				11614	11612
Dignathodontidae			Family	Geophilidae			11615	11614
Dikraneurini			Tribe				194870	194858
Dilaridae			Family				11828	11822
Dilarinae			Subfamily				85449	11828
Dilepididae			Family				16197	16188
Dilobinae			Subfamily				449446	8769
Dilophonotini			Tribe				443629	443628
Dimerini			Tribe				267311	266623
Dinetinae			Subfamily				196457	11301
Dinidoridae			Family				12860	12851
Dinoderinae			Subfamily				101031	11022
Diochini			Tribe				259364	259363
Dioctophymatidae			Family				16997	16815
Dioctophymatoidea			Superfamily				16815	16814
Dioctophymina			Suborder				16814	11756
Dioctriini			Tribe				60029	59973
Dioecocestidae			Family				16198	16188
Diomedeidae			Family				10726	16770
Diomedeoidea			Superfamily				16770	10724
Diomini		2000	Tribe				230200	230191
Diopsidae			Family				10908	10878
Diparinae			Subfamily				401853	11320
Diphasconinae			Subfamily				456390	12696
Diphtherophoridae			Family				11796	16839
Diphtherophorina			Suborder				16838	16837
Diphtherophoroidea			Superfamily				16839	16838
Diphyllobothriidae			Family				16210	16185
Diplazontinae			Subfamily				332667	11277
Diplectanidae			Family				54102	16224
Diplodiscidae			Family				16258	16248
Diplodontinae			Subfamily				173212	15719
Diplogasteroididae			Family				11719	12487
Diplogastridae			Family				12488	12487
Diplogastridae			Family	Diplogasteridae			54096	12488
Diplogastroidea			Superfamily				12487	16851
Diplogastroidea			Superfamily	Diplogasteroidea			54095	12487
Diplogyniidae			Family				12450	12448
Diplolepidini			Tribe				197293	11332
Diplomaragnidae			Family				11541	11526
Diplomaragnidae			Family	Ancestreumatidae			11542	11541
Diplopeltidae			Family				11742	16794
Diplopoda			Class				11498	15590
Diploscapteridae			Family				11715	12377
Diplostomidae			Family				16328	16319
Diplostomoidea			Infraorder				16319	16245
Diplostraca			Order				13257	13255
Diplotesticulata			Subclass				11862	11851
Diplotriaenidae			Family				16875	16864
Diplotriaenoidea			Superfamily				16864	16861
Diplozoidae			Family				16235	16232
Diplura			Order				15583	11186
Dipodidae			Family				12652	12649
Diporodrilinae			Subfamily				178497	11877
Diprionidae			Family				11294	11290
Diprioninae			Subfamily				354112	11294
Diprotodontia			Order				12615	12614
Dipsocoridae			Family				12793	12791
Dipsocoroidea			Superfamily				12791	12790
Dipsocoromorpha			Infraorder				12790	12786
Diptera			Order				10877	4
Diptilomiopidae			Family				15777	15628
Diptilomiopinae			Subfamily				94637	15777
Dipylidiidae			Family				16199	16188
Dirhininae			Subfamily				68236	11310
Dirrhopinae			Subfamily				342106	11276
Discocerinini			Tribe				137888	137836
Discocotylidae			Family				16234	16232
Discocotylinea			Suborder				16232	16230
Discoglossidae			Family				15539	15538
Discoglossoidea			Superfamily				15538	15535
Discoglossoidei			Suborder				15535	15534
Discolaimidae			Family				15033	16805
Discomyzinae			Subfamily				137665	10913
Discomyzini			Tribe				137666	137665
Dismorphiinae			Subfamily				440898	6969
Dithrycini			Tribe				405417	405413
Ditomina			Subtribe				380142	379650
Ditomyiidae			Family				11669	11665
Ditylini			Tribe				124458	124457
Dixidae			Family				11651	11648
Doderiidae			Family				11509	11506
Doderiidae			Family	Gervaisiidae			11510	11509
Dolerocypridinae			Subfamily				239187	14805
Dolicaonina			Subtribe				261554	261376
Dolichina			Subtribe				378660	378659
Dolichocybidae			Family				15787	15631
Dolichocybinae			Subfamily				173009	15787
Dolichoderinae			Subfamily				81147	11356
Dolichodoridae			Family				11691	16922
Dolichodoroidea			Superfamily				16922	16920
Dolichopodainae			Subfamily				402867	11892
Dolichopodidae			Family				10909	10878
Dolichurini			Tribe				67074	11299
Donaciinae			Subfamily				243469	11097
Doratopsyllinae			Subfamily				170221	12226
Doratopsyllini			Tribe				170222	170221
Doraturini			Tribe				193796	193569
Dorcatominae			Subfamily				100606	11024
Dorycephalinae			Subfamily				195606	15880
Doryctinae			Subfamily				339073	11276
Dorydrilidae			Family				12336	12335
Dorylaimida			Order				11775	11729
Dorylaimidae			Family				11778	16805
Dorylaimina			Suborder				16803	11775
Dorylaimoidea			Superfamily				16805	16803
Dorylinae			Subfamily				81550	11356
Dorypetalidae			Family				11525	11521
Dorytomina			Subtribe				250809	250797
Douglasiidae		1876	Family				1038	431643
Doydirhynchini			Tribe				258290	258282
Dracunculidae			Family				16992	16860
Dracunculoidea			Superfamily				16860	16858
Dreissenidae			Family				11496	11495
Dreissenoidea			Superfamily				11495	11488
Drepanepteryginae			Subfamily				85540	11825
Drepanidae		1828	Family				7484	7483
Drepaninae			Subfamily				443430	7484
Drepanoidea		1828	Superfamily				7483	7
Drepanoidea		1828	Superfamily	Axioidea			449615	7483
Drepanoidea		1828	Superfamily	Cimelioidea			449614	7483
Drilidae			Family				11165	11157
Drilonematidae			Family				12386	12385
Drilonematoidea			Superfamily				12385	16851
Dromiini			Tribe				378291	378043
Dromopoda			Subclass				15578	10615
Drosophilidae			Family				10910	10878
Drosophilina			Subtribe				61297	61296
Drosophilinae			Subfamily				61295	10910
Drosophilini			Tribe				61296	61295
Dryadaulinae			Subfamily				433227	458
Dryinidae			Family				11328	16677
Drymini			Tribe				452953	452942
Dryocoetini			Tribe				249345	248990
Dryomyzidae			Family				10911	10878
Dryophilinae			Subfamily				100978	11024
Dryophthoridae			Family				11182	11170
Dryophthorinae			Subfamily				257313	11182
Dryopidae			Family				11151	11146
Dryopidae			Family	Parnidae			11152	11151
Dryotribini			Tribe				247804	247743
Dryptinae			Subfamily				377979	11013
Dryptini			Tribe				377980	377979
Dryxini			Tribe				137662	137555
Dugesiidae		1974	Family				14251	456252
Duiliini			Tribe				152345	152217
Dynastidae			Family				11128	11115
Dynastinae			Subfamily				246911	11128
Dynomiellini			Tribe				130829	130822
Dypterygiini			Tribe				447322	447193
Dyschiriini			Tribe				385682	385517
Dysderidae			Family				10644	10636
Dytiscidae			Family				11011	11004
Dytiscinae			Subfamily				119178	11011
Dytiscini			Tribe				119202	119178
Echimyopodidae			Family				15837	15640
Echiniscidae			Family				12686	12682
Echiniscoidea			Order				12682	12675
Echinophthiriidae			Family				11992	11991
Echinophthirioidea			Superfamily				11991	17008
Echinopsocinae			Subfamily				169268	12131
Echinorhynchida			Order				15480	15466
Echinorhynchidae			Family				15485	15480
Echinostomatidae			Family				16249	16246
Echinostomatoidea			Infraorder				16246	16243
Echinostomida			Order				16243	16240
Ecliminae			Subfamily				130272	10889
Eclytini			Tribe				329397	329396
Ecnomidae			Family				12241	12240
Ecphyadophoridae			Family				11687	16925
Ectaetiinae			Subfamily				193022	11681
Ectinosomatidae			Family				14793	13276
Ectobiinae			Subfamily				402130	11913
Ectobranchia			Order				11399	11398
Ectopsocidae			Family				12157	12155
Eginiini			Tribe				138947	138946
Egnatiinae			Subfamily				402640	11904
Eirenidae			Family				16962	16960
Eirenoidea			Superfamily				16960	16785
Ektaphelenchidae			Family				12399	16844
Elachistidae		1850	Family				1832	1642
Elachistidae		1850	Family	Agonoxenidae		1926	449623	1832
Elachistidae		1850	Family	Depressariidae		1883	449621	1832
Elachistidae		1850	Family	Ethmiidae		1909	449622	1832
Elachistidae	Bruand	1850	Family	Agonoxenidae	Meyrick	1926	449623	1832
Elachistidae	Bruand	1850	Family	Depressariidae	Meyrick	1883	449621	1832
Elachistidae	Bruand	1850	Family	Ethmiidae	Busck	1909	449622	1832
Elachistinae			Subfamily				435281	1832
Elampini			Tribe				78480	78479
Elaphonematidae			Family				11724	16854
Elaphriini			Tribe				447206	447193
Elaphrinae			Subfamily				385857	11013
Elaphrini			Tribe				385858	385857
Elateridae			Family				11164	11157
Elateriformia			Infraorder				11133	11014
Elateroidea			Superfamily				11157	11133
Elateroidea			Superfamily	Cantharoidea			243788	11157
Electrentomoidea			Superfamily				16418	12138
Elenchidae			Family				12670	12667
Elenophorini			Tribe				280711	280383
Elephantomyiini			Tribe				145543	145515
Eleutherengona			Suborder				15600	15594
[truncated: 4,087 more rows]
